# Supplementary material for: Biogenesis of phased siRNAs on membrane-bound polysomes in Arabidopsis
Source: eLife. 2016 Dec 12;5:e22750. doi: 10.7554/eLife.22750 (PMC5207768; doi:10.7554/eLife.22750)
Supplement: Supplementary file 1. — DOI: http://dx.doi.org/10.7554/eLife.22750.015 [file elife-22750-supp1.xlsx]

## Sheet: 21nt
Supplementary File 1. Lists of differential small RNA regions (DSR) in the MBP vs. TP comparison
Notes: DSRs are listed for each sRNA size class in four layers
MBP: membrane-bound polysomes; TP: total polysomes; The three biological replicates for TP and MBP are denoted by numbers. Hyper DSR: MBP>TP; Hypo DSR: MBP<TP
Small RNA abundance is in RPMR (reads per million 45S rRNA fragments)
Window	logFC	logCPM	PValue	FDR	TP-1	TP-2	TP-3	MBP-1	MBP-2	MBP-3	DSR
Chr1-102272-10227100-10227200	2.86912	22.3821	1.3084e-20	9.05515e-17	17.4193	19.4034	14.6405	102.682	172.505	103.178	Hyper
Chr1-104788-10478700-10478800	1.50197	21.5487	7.4258e-09	2.09523e-05	10.8	14.1116	13.8271	37.6814	33.6361	39.0893	Hyper
Chr1-111376-11137500-11137600	2.31902	24.0077	6.93293e-06	0.013746	4.52901	3.88068	2.16896	15.5436	18.7401	19.9992	Hyper
Chr1-165145-16514400-16514500	3.75616	20.045	1.9576e-06	0.00419912	1.04516	0.352789	0	6.59424	11.5324	5.45432	Hyper
Chr1-17274-1727300-1727400	3.84006	21.0095	3.46522e-09	1.02504e-05	1.04516	0.352789	1.08448	8.94932	21.1427	10.4541	Hyper
Chr1-173396-17339500-17339600	2.03687	21.5786	1.87671e-06	0.0040493	6.27094	4.23347	5.4224	23.0798	21.6232	21.8173	Hyper
Chr1-178258-17825700-17825800	3.41931	30.7722	4.9359e-61	2.26312e-56	2147.45	2520.32	1829.79	21930.5	27994.4	19591.5	Hyper
Chr1-185494-18549300-18549400	2.35254	23.2826	1.91588e-26	1.75687e-22	13.2387	12.3476	14.9116	63.1163	72.0774	73.1789	Hyper
Chr1-185495-18549400-18549500	2.5993	25.359	5.38908e-32	6.58908e-28	38.3224	44.8042	39.5835	223.262	260.44	261.808	Hyper
Chr1-185496-18549500-18549600	2.305	26.3129	1.20682e-35	2.10792e-31	57.832	67.7355	68.5934	307.103	340.686	313.169	Hyper
Chr1-185497-18549600-18549700	1.92634	23.2613	2.81419e-09	8.46107e-06	7.66448	9.5253	5.96464	27.319	32.1946	29.5443	Hyper
Chr1-212341-21234000-21234100	4.67828	19.1097	1.50095e-05	0.0282334	0.348386	0	0	7.53627	2.8831	7.72696	Hyper
Chr1-21657-2165600-2165700	3.69607	21.0141	1.51533e-10	5.34448e-07	0.696771	1.05837	1.3556	15.5436	11.5324	17.7266	Hyper
Chr1-225777-22577600-22577700	2.16664	24.8581	6.81861e-15	3.08775e-11	33.445	32.8094	37.9568	120.109	184.999	164.084	Hyper
Chr1-229301-22930000-22930100	2.55664	23.1063	2.95539e-14	1.30607e-10	6.61933	3.88068	4.60904	32.9712	34.1166	23.6354	Hyper
Chr1-233023-23302200-23302300	3.08813	21.8565	5.18176e-07	0.0011954	3.13547	2.11673	4.60904	24.4929	23.5453	38.6348	Hyper
Chr1-233024-23302300-23302400	2.97449	22.4317	1.99412e-05	0.0369418	2.09031	0.705578	0.81336	11.3044	10.0908	9.54507	Hyper
Chr1-233027-23302600-23302700	2.94675	21.856	2.99514e-15	1.40849e-11	4.8774	2.82231	2.7112	22.1378	28.831	31.8169	Hyper
Chr1-233079-23307800-23307900	2.29721	21.2563	2.28277e-05	0.0414517	2.4387	3.1751	2.44008	10.8334	12.4934	17.7266	Hyper
Chr1-233552-23355100-23355200	2.85119	20.1849	4.19279e-09	1.23034e-05	2.4387	1.76394	2.16896	13.6595	18.7401	15.9084	Hyper
Chr1-233895-23389400-23389500	2.09346	22.3566	6.42222e-07	0.0014452	4.18063	3.88068	5.15128	19.7827	18.7401	19.0901	Hyper
Chr1-233897-23389600-23389700	2.42916	21.3661	2.40039e-05	0.0433728	1.74193	2.46952	1.08448	5.18119	8.16877	16.8175	Hyper
Chr1-233898-23389700-23389800	2.10446	21.5254	1.4544e-06	0.00315667	3.13547	4.23347	3.52456	13.1885	14.896	19.9992	Hyper
Chr1-233899-23389800-23389900	2.31777	23.0672	1.20449e-15	5.8908e-12	12.8903	14.4643	16.5383	71.1236	77.8436	71.3607	Hyper
Chr1-233900-23389900-23390000	2.72698	21.9119	1.38136e-05	0.0262532	1.39354	1.05837	2.44008	12.7175	7.68826	14.0903	Hyper
Chr1-233902-23390100-23390200	2.11134	22.7899	4.93655e-09	1.43709e-05	5.22578	6.3502	5.4224	20.2537	31.7141	22.7264	Hyper
Chr1-234135-23413400-23413500	2.02557	23.86	6.119e-11	2.20045e-07	10.8	13.0532	8.40472	43.8046	51.4152	37.2712	Hyper
Chr1-234136-23413500-23413600	2.2924	26.587	1.53561e-16	7.93333e-13	66.89	97.3697	55.5796	325.002	416.127	337.259	Hyper
Chr1-234137-23413600-23413700	2.06881	22.4751	7.14596e-08	0.000182025	3.48386	5.29183	5.15128	16.4856	24.5063	18.6356	Hyper
Chr1-234138-23413700-23413800	3.42943	21.5288	1.31204e-12	5.34733e-09	0.696771	1.41116	2.98232	19.3117	18.7401	20.4537	Hyper
Chr1-234203-23420200-23420300	2.29336	21.2787	1.0978e-05	0.0213055	2.78708	3.88068	1.89784	8.4783	16.3375	18.6356	Hyper
Chr1-234204-23420300-23420400	2.55605	23.1285	3.2047e-31	3.45732e-27	29.6128	18.345	19.2495	122.935	135.506	138.631	Hyper
Chr1-247212-24721100-24721200	2.63311	24.8852	1.2805e-35	2.13496e-31	25.4321	26.8119	25.7564	135.182	188.843	161.812	Hyper
Chr1-247213-24721200-24721300	2.24777	25.6108	6.61553e-17	3.62178e-13	21.5999	25.048	17.8939	88.0802	132.142	87.7237	Hyper
Chr1-247214-24721300-24721400	2.0156	25.6172	2.93539e-19	1.85639e-15	31.3547	31.3982	28.4676	104.566	150.882	114.541	Hyper
Chr1-247215-24721400-24721500	1.84726	24.3906	9.77907e-15	4.37437e-11	33.7934	34.9261	24.4008	88.0802	122.051	125.904	Hyper
Chr1-277133-27713200-27713300	2.06732	33.4774	2.54294e-08	6.66253e-05	20000.8	28257.3	13817.1	48094.6	160941	51127.5	Hyper
Chr1-279-27800-27900	2.64433	21.7586	3.66765e-22	2.6906e-18	10.4516	5.64462	14.0982	69.7105	52.8568	68.1791	Hyper
Chr1-282122-28212100-28212200	5.66044	21.5877	1.38742e-31	1.59033e-27	0.348386	1.76394	0.54224	57.9351	49.0126	45.9072	Hyper
Chr1-294226-29422500-29422600	2.9386	22.5067	9.49461e-31	9.9504e-27	9.40641	5.64462	10.0314	57.4641	60.0645	77.2696	Hyper
Chr1-295253-29525200-29525300	3.17936	22.5784	5.3169e-07	0.00121891	1.39354	1.41116	1.08448	9.89136	20.1817	8.18149	Hyper
Chr1-39461-3946000-3946100	4.19145	19.7089	5.05603e-07	0.00117377	0.696771	0.352789	0	7.53627	7.20774	10.9086	Hyper
Chr1-39464-3946300-3946400	3.61847	20.2573	9.54642e-07	0.00210943	0.696771	0.705578	0.54224	8.4783	10.0908	9.54507	Hyper
Chr1-39614-3961300-3961400	2.6064	23.0914	1.06334e-09	3.42136e-06	4.52901	5.29183	5.4224	29.6741	26.4284	38.6348	Hyper
Chr1-41823-4182200-4182300	3.72138	26.3234	7.90991e-23	5.92116e-19	2.78708	2.82231	6.23576	44.7466	70.1553	45.9072	Hyper
Chr1-51705-5170400-5170500	3.54884	20.8923	9.00858e-08	0.000224787	0.696771	1.41116	0.27112	12.2464	9.61032	9.9996	Hyper
Chr1-53097-5309600-5309700	4.22261	21.5543	4.22519e-11	1.54981e-07	1.04516	0.352789	0.81336	16.0146	18.2596	13.6358	Hyper
Chr1-62209-6220800-6220900	3.21369	33.3823	5.39317e-62	2.82604e-57	4728.99	5966.01	4551.83	41031.2	53664	46756.3	Hyper
Chr1-69269-6926800-6926900	2.39787	26.4829	1.99227e-09	6.14092e-06	11.4967	11.9948	9.4892	49.9278	59.584	65.9064	Hyper
Chr1-790-78900-79000	3.8863	31.6653	1.78273e-51	5.94464e-47	4440.52	2306.53	5021.96	64040.9	48854.1	61143.9	Hyper
Chr1-791-79000-79100	2.81016	25.6087	5.18191e-22	3.72693e-18	14.2838	8.11414	13.8271	95.1454	80.7267	80.4513	Hyper
Chr1-82675-8267400-8267500	3.21869	20.8365	2.69617e-05	0.048242	0	1.41116	0.81336	8.00729	6.72722	9.09054	Hyper
Chr1-95651-9565000-9565100	2.59966	21.3051	1.52731e-12	6.15626e-09	5.57417	1.76394	5.69352	32.5002	20.6622	27.7262	Hyper
Chr2-103-10200-10300	3.09696	21.447	2.05688e-07	0.000499648	1.39354	1.41116	1.08448	13.1885	12.0129	10.9086	Hyper
Chr2-106344-10634300-10634400	2.89642	21.5466	4.57901e-06	0.0091781	2.4387	0.352789	1.3556	13.6595	10.0908	9.54507	Hyper
Chr2-111598-11159700-11159800	2.28998	22.5125	6.41976e-12	2.55954e-08	6.27094	10.9365	9.21808	44.7466	42.7659	43.1801	Hyper
Chr2-117217-11721600-11721700	2.11474	23.2117	2.17447e-07	0.000521306	4.8774	7.76135	4.0668	20.2537	28.3504	24.999	Hyper
Chr2-117218-11721700-11721800	2.37636	22.9913	2.68643e-10	9.20924e-07	3.83224	5.99741	4.0668	19.3117	31.2335	23.1809	Hyper
Chr2-117219-11721800-11721900	1.64947	24.4164	8.98424e-08	0.000224787	9.7548	15.8755	10.0314	35.7973	43.2464	33.635	Hyper
Chr2-117220-11721900-11722000	2.27048	26.9487	1.25413e-33	1.84008e-29	58.1804	71.6161	72.9313	303.335	359.426	316.805	Hyper
Chr2-117221-11722000-11722100	1.80539	25.0613	2.41842e-08	6.38187e-05	10.8	13.0532	6.23576	28.261	44.2075	33.635	Hyper
Chr2-141640-14163900-14164000	6.287	22.3242	5.60623e-09	1.59409e-05	0	0	0	10.3624	6.72722	11.8177	Hyper
Chr2-156119-15611800-15611900	2.53945	22.3458	2.11546e-25	1.80455e-21	10.1032	7.76135	14.3694	66.4134	60.0645	62.7247	Hyper
Chr2-160620-16061900-16062000	2.13632	26.4088	5.3569e-20	3.44723e-16	130.993	203.912	154.538	710.765	581.424	860.874	Hyper
Chr2-165376-16537500-16537600	2.46319	23.6426	3.44669e-18	2.00675e-14	8.70964	6.70299	6.778	50.3988	34.1166	39.5439	Hyper
Chr2-165377-16537600-16537700	1.87723	25.129	9.35335e-17	4.97221e-13	20.2064	20.4618	17.3517	66.4134	75.9215	71.8153	Hyper
Chr2-165378-16537700-16537800	1.78122	29.1655	4.65702e-14	2.03358e-10	222.618	304.104	264.342	784.243	1022.54	913.145	Hyper
Chr2-165379-16537800-16537900	1.70413	29.0658	4.88667e-20	3.25898e-16	258.502	327.388	309.077	853.012	1048.97	1014.96	Hyper
Chr2-165381-16538000-16538100	3.10286	21.1824	3.86404e-07	0.000914411	0.348386	1.76394	1.62672	11.7754	8.64929	14.5449	Hyper
Chr2-165398-16539700-16539800	1.59282	27.0659	5.34892e-20	3.44723e-16	129.251	126.651	132.578	350.437	434.867	387.257	Hyper
Chr2-165399-16539800-16539900	2.29125	28.0146	5.52993e-43	1.44885e-38	198.928	204.97	196.562	878.918	1091.25	970.415	Hyper
Chr2-165400-16539900-16540000	1.59542	25.8037	3.07671e-20	2.08989e-16	70.0255	67.3827	75.9136	166.74	260.92	217.718	Hyper
Chr2-165710-16570900-16571000	1.70756	22.2071	1.13878e-05	0.0219845	5.92255	4.93904	4.60904	10.8334	26.9089	13.6358	Hyper
Chr2-170299-17029800-17029900	2.20397	25.6879	1.438e-18	8.79102e-15	79.0835	126.298	79.4382	362.212	531.451	419.983	Hyper
Chr2-189949-18994800-18994900	3.28552	24.862	1.5979e-09	4.96704e-06	2.09031	5.29183	3.79568	32.0292	46.6101	33.635	Hyper
Chr2-191762-19176100-19176200	1.11377	26.6868	1.98288e-06	0.00422862	39.716	35.6317	40.9391	76.3047	73.519	102.269	Hyper
Chr2-191763-19176200-19176300	4.23399	34.0902	3.69761e-62	2.26048e-57	14263.3	8579.12	16659.5	279859	202406	261061	Hyper
Chr2-193199-19319800-19319900	3.08158	27.3123	2.31863e-42	5.66986e-38	17.7677	13.7588	12.2004	124.348	109.077	139.54	Hyper
Chr2-193200-19319900-19320000	3.51834	27.7109	3.85816e-109	1.41518e-103	218.438	162.283	278.711	2722.95	2133.97	2703.07	Hyper
Chr2-194152-19415100-19415200	2.55249	28.8442	2.9676e-44	8.37325e-40	1124.24	749.323	1196.18	5972.02	5399.08	6639.28	Hyper
Chr2-195208-19520700-19520800	6.58783	24.0758	7.46507e-06	0.0146503	0	0	0	16.9566	18.7401	0	Hyper
Chr2-21849-2184800-2184900	2.82386	21.6452	3.82041e-11	1.41549e-07	1.74193	2.11673	4.60904	19.7827	20.1817	22.2718	Hyper
Chr2-26047-2604600-2604700	2.86582	22.2922	6.99471e-19	4.3486e-15	6.96771	4.93904	4.88016	35.3263	39.4023	49.998	Hyper
Chr2-26049-2604800-2604900	3.0124	22.5407	4.7687e-11	1.73185e-07	2.09031	2.11673	2.7112	22.1378	16.3375	19.9992	Hyper
Chr2-26065-2606400-2606500	2.59968	21.2357	2.12386e-05	0.0387581	1.74193	1.41116	1.08448	7.06525	9.61032	10.9086	Hyper
Chr2-32698-3269700-3269800	4.91501	20.8043	3.53654e-25	2.94821e-21	1.39354	0.705578	0.81336	30.1451	34.1166	34.5441	Hyper
Chr2-32744-3274300-3274400	1.79678	21.9341	1.46429e-07	0.000358069	12.8903	9.17251	13.0138	43.3336	49.0126	30.4533	Hyper
Chr2-33386-3338500-3338600	2.23661	22.5975	2.76564e-05	0.0492448	2.78708	2.46952	2.7112	11.7754	14.896	12.2722	Hyper
Chr2-34179-3417800-3417900	5.1767	19.6988	1.20795e-09	3.81963e-06	0	0.352789	0.27112	10.8334	15.3765	9.54507	Hyper
Chr2-34262-3426100-3426200	3.30188	23.311	1.97644e-37	3.6248e-33	13.587	20.109	16.2672	153.08	189.804	153.176	Hyper
Chr2-34673-3467200-3467300	1.08396	22.475	2.24321e-06	0.0047018	24.0386	21.5201	27.112	55.109	47.0906	52.2706	Hyper
Chr2-41424-4142300-4142400	1.92034	27.602	5.42449e-09	1.55447e-05	9.40641	14.1116	5.15128	21.6668	61.9866	25.908	Hyper
Chr2-41425-4142400-4142500	2.10561	29.6914	1.3569e-24	1.08199e-20	400.992	351.025	343.238	1327.8	1816.35	1570.85	Hyper
Chr2-55901-5590000-5590100	3.22652	21.3952	1.83513e-08	4.91336e-05	0.696771	1.41116	1.89784	13.1885	11.5324	15.9084	Hyper
Chr2-95609-9560800-9560900	2.61728	23.2883	2.95105e-15	1.40578e-11	6.96771	9.17251	7.86248	43.8046	49.4932	55.9068	Hyper
Chr2-98968-9896700-9896800	2.99633	20.2186	1.68615e-05	0.0315553	1.39354	0.705578	0.81336	8.94932	10.0908	6.81791	Hyper
Chr3-134156-13415500-13415600	3.80599	20.0929	3.44636e-06	0.00710185	0.696771	0.352789	0.27112	9.42034	5.28568	8.63601	Hyper
Chr3-141961-14196000-14196100	2.50456	21.0832	1.13852e-09	3.63141e-06	3.48386	2.82231	4.33792	21.1958	17.7791	23.1809	Hyper
Chr3-141973-14197200-14197300	3.99116	23.3794	2.38773e-38	4.6096e-34	6.27094	7.05578	22.7741	188.878	183.077	207.719	Hyper
Chr3-141974-14197300-14197400	2.34908	21.1903	3.63238e-06	0.00740202	3.13547	1.76394	2.7112	14.1305	13.4544	12.7268	Hyper
Chr3-141996-14199500-14199600	2.33509	23.9714	2.17134e-67	1.99113e-62	46.6837	41.2763	38.7702	219.494	204.219	217.264	Hyper
Chr3-141997-14199600-14199700	2.34247	21.5777	1.26638e-09	3.97016e-06	5.22578	3.88068	3.25344	18.3697	24.0258	21.8173	Hyper
Chr3-156778-15677700-15677800	2.07774	22.8625	7.46891e-06	0.0146503	4.8774	2.82231	2.16896	10.3624	21.1427	11.3632	Hyper
Chr3-156780-15677900-15678000	1.48681	22.879	1.76304e-16	8.98178e-13	34.8386	31.0454	38.2279	95.6164	93.2201	103.632	Hyper
Chr3-161585-16158400-16158500	2.39639	22.0188	5.06053e-09	1.46158e-05	3.48386	5.29183	2.98232	15.5436	21.1427	26.8171	Hyper
Chr3-161590-16158900-16159000	2.66651	24.1796	9.82168e-11	3.49768e-07	3.83224	3.1751	2.7112	22.1378	20.6622	20.9082	Hyper
Chr3-161593-16159200-16159300	2.909	22.5541	3.55332e-06	0.00728137	1.39354	1.05837	1.3556	8.94932	13.4544	8.63601	Hyper
Chr3-161594-16159300-16159400	1.77256	23.707	2.30204e-06	0.00479768	5.92255	4.93904	5.96464	18.3697	17.2986	22.7264	Hyper
Chr3-161596-16159500-16159600	3.1574	21.5175	6.60532e-12	2.5775e-08	3.13547	2.11673	2.44008	20.2537	24.9868	26.3626	Hyper
Chr3-161597-16159600-16159700	3.1769	20.5494	6.4211e-06	0.0128004	0.348386	0.705578	1.3556	5.6522	9.61032	9.54507	Hyper
Chr3-161598-16159700-16159800	2.35513	24.6761	1.77783e-26	1.67208e-22	53.9998	44.8042	58.5619	259.059	217.193	330.441	Hyper
Chr3-161602-16160100-16160200	2.93023	24.2317	7.87667e-41	1.80574e-36	42.8514	26.4592	43.9214	243.987	340.686	280.898	Hyper
Chr3-161604-16160300-16160400	2.86361	22.7811	6.62951e-15	3.03965e-11	3.83224	3.88068	5.15128	24.4929	36.0387	35.4531	Hyper
Chr3-161605-16160400-16160500	1.94858	23.2201	4.02417e-18	2.30637e-14	12.5419	13.406	17.3517	54.638	57.6619	55.9068	Hyper
Chr3-161606-16160500-16160600	1.97877	22.257	7.57246e-06	0.0147744	4.18063	3.88068	3.52456	14.6015	14.896	17.272	Hyper
Chr3-161607-16160600-16160700	3.07999	22.5901	8.82917e-13	3.63883e-09	2.4387	1.41116	3.52456	19.3117	24.0258	21.8173	Hyper
Chr3-161608-16160700-16160800	2.12357	22.7528	6.10402e-10	2.01709e-06	4.52901	6.3502	6.778	27.79	24.5063	25.908	Hyper
Chr3-161609-16160800-16160900	2.27281	23.0221	2.0233e-25	1.76703e-21	17.4193	19.7562	14.0982	73.0076	89.8565	86.3601	Hyper
Chr3-161610-16160900-16161000	2.52005	22.9548	4.61344e-21	3.25427e-17	9.40641	7.76135	7.59136	42.8625	50.9347	49.998	Hyper
Chr3-163417-16341600-16341700	2.39736	20.0507	3.34028e-06	0.00692216	2.4387	2.11673	1.89784	10.8334	12.4934	12.2722	Hyper
Chr3-167706-16770500-16770600	3.06989	21.9864	1.15825e-07	0.000285134	0.696771	0.705578	2.7112	9.42034	11.5324	16.363	Hyper
Chr3-171785-17178400-17178500	2.10121	22.6206	3.40879e-10	1.14711e-06	11.4967	5.99741	15.9961	52.2829	49.0126	43.6346	Hyper
Chr3-177422-17742100-17742200	2.98967	21.86	1.32228e-15	6.38179e-12	4.18063	6.3502	3.52456	24.4929	54.2983	35.4531	Hyper
Chr3-187963-18796200-18796300	3.3331	20.8169	6.09657e-10	2.01709e-06	1.39354	1.76394	1.08448	15.5436	19.7012	10.9086	Hyper
Chr3-190735-19073400-19073500	3.683	24.4022	2.20728e-08	5.86692e-05	1.04516	0	1.89784	15.0725	14.896	12.2722	Hyper
Chr3-190736-19073500-19073600	2.26586	25.2145	7.07458e-08	0.000181467	22.6451	52.9183	10.0314	104.095	191.726	117.268	Hyper
Chr3-192127-19212600-19212700	3.96583	20.0004	9.61865e-10	3.12225e-06	0.348386	0.705578	1.08448	12.7175	13.4544	12.7268	Hyper
Chr3-19608-1960700-1960800	2.72211	21.32	4.90387e-16	2.46404e-12	7.3161	4.58625	4.88016	34.3842	30.2725	48.1799	Hyper
Chr3-19640-1963900-1964000	2.16286	23.7118	2.03038e-06	0.00430489	2.09031	6.3502	4.0668	16.0146	24.0258	17.272	Hyper
Chr3-19649-1964800-1964900	2.67582	24.6654	2.06944e-05	0.0381175	1.04516	1.76394	2.98232	12.7175	15.857	10.4541	Hyper
Chr3-19653-1965200-1965300	2.75072	23.4331	1.79797e-11	6.86979e-08	3.83224	5.99741	4.88016	31.5581	34.5972	34.9986	Hyper
Chr3-19654-1965300-1965400	4.02266	22.4648	9.62149e-07	0.00211328	0.696771	0	0.54224	8.94932	10.0908	6.81791	Hyper
Chr3-19668-1966700-1966800	2.90478	22.7793	3.56895e-11	1.33582e-07	3.13547	2.46952	3.25344	18.8407	24.0258	25.908	Hyper
Chr3-19674-1967300-1967400	2.60699	23.8714	2.49334e-11	9.42846e-08	6.27094	7.05578	2.7112	24.0219	44.688	30.9078	Hyper
Chr3-19675-1967400-1967500	1.54973	24.5058	7.62779e-07	0.00170603	14.9806	13.0532	7.32024	32.5002	40.3633	31.3624	Hyper
Chr3-19676-1967500-1967600	2.24746	23.936	2.11616e-07	0.000510666	2.4387	4.93904	3.25344	16.4856	15.857	19.5447	Hyper
Chr3-19677-1967600-1967700	2.83429	25.1129	2.53284e-09	7.74209e-06	2.4387	3.1751	2.7112	15.5436	29.3115	16.8175	Hyper
Chr3-19678-1967700-1967800	2.96659	24.1109	4.53463e-06	0.00913908	1.39354	0.352789	1.89784	7.53627	14.4155	9.09054	Hyper
Chr3-19679-1967800-1967900	2.48748	24.3044	3.9363e-07	0.00092554	2.4387	3.1751	2.98232	14.1305	14.896	20.9082	Hyper
Chr3-19685-1968400-1968500	3.19096	23.0673	2.65474e-07	0.000632315	1.04516	0.705578	2.98232	14.1305	14.4155	17.7266	Hyper
Chr3-19693-1969200-1969300	2.40848	24.3217	6.51953e-12	2.57137e-08	9.7548	6.70299	10.5737	44.2756	49.4932	51.3616	Hyper
Chr3-19694-1969300-1969400	2.52199	25.0376	7.92582e-07	0.00176194	3.83224	2.46952	3.25344	19.3117	18.2596	19.0901	Hyper
Chr3-19697-1969600-1969700	3.02974	23.3977	1.39169e-16	7.29249e-13	3.48386	3.88068	4.0668	30.6161	33.1556	32.2714	Hyper
Chr3-19699-1969800-1969900	2.91374	24.0983	1.35725e-13	5.85698e-10	5.22578	5.29183	3.79568	35.3263	41.8049	33.1805	Hyper
Chr3-206918-20691700-20691800	1.71556	29.9483	1.33142e-08	3.61752e-05	21.5999	19.7562	19.2495	65.9424	64.8697	69.0881	Hyper
Chr3-221229-22122800-22122900	4.0693	24.3461	2.34939e-26	2.10185e-22	1.74193	1.41116	4.88016	52.7539	30.753	57.2704	Hyper
Chr3-234062-23406100-23406200	3.54048	26.5668	3.19305e-33	4.50468e-29	27.1741	21.1673	40.3969	308.987	366.634	360.894	Hyper
Chr3-33664-3366300-3366400	1.93345	26.9864	2.65545e-18	1.57101e-14	133.432	123.829	152.641	488.916	557.399	520.433	Hyper
Chr3-43592-4359100-4359200	2.2716	21.254	1.19432e-06	0.00260761	5.22578	4.58625	2.7112	13.6595	26.4284	21.8173	Hyper
Chr3-44969-4496800-4496900	2.62103	23.2472	1.33042e-23	1.01667e-19	13.587	13.0532	11.6582	78.6598	80.2462	78.6332	Hyper
Chr3-58621-5862000-5862100	2.57525	22.7691	7.57668e-16	3.7556e-12	5.57417	4.23347	7.04912	29.6741	32.1946	40.4529	Hyper
Chr3-58622-5862100-5862200	2.14776	26.1706	1.91938e-40	4.14138e-36	66.89	77.2608	86.2162	292.502	355.101	374.53	Hyper
Chr3-58623-5862200-5862300	2.32107	28.312	1.05319e-53	3.86311e-49	271.741	309.043	286.574	1343.34	1500.17	1492.21	Hyper
Chr3-58624-5862300-5862400	3.12968	25.5376	1.18956e-31	1.40752e-27	11.8451	8.46693	9.76032	70.1815	118.207	77.7241	Hyper
Chr3-62447-6244600-6244700	2.46092	29.547	8.4675e-25	6.90199e-21	1740.53	2049.35	1711.04	9014.79	11260.9	10012.3	Hyper
Chr3-81081-8108000-8108100	2.93597	27.6835	3.69624e-33	5.02144e-29	54.3481	79.0247	45.5482	350.437	604.489	416.801	Hyper
Chr3-82363-8236200-8236300	2.53634	26.6312	4.02489e-24	3.14115e-20	16.0257	20.8145	24.1297	115.399	119.648	120.45	Hyper
Chr3-94178-9417700-9417800	2.96865	24.9299	2.52774e-29	2.5755e-25	86.748	116.42	94.6209	777.178	759.696	796.786	Hyper
Chr4-105787-10578600-10578700	3.66736	29.2386	1.06252e-39	2.16519e-35	1318.29	902.434	1105.09	13698.6	12467.5	16093.9	Hyper
Chr4-105788-10578700-10578800	1.96325	26.1381	2.63202e-10	9.10784e-07	13.9354	18.6978	11.6582	53.6959	69.1943	50.907	Hyper
Chr4-106689-10668800-10668900	3.4713	20.0513	1.1463e-05	0.0220138	0	0.352789	2.16896	12.2464	7.68826	11.8177	Hyper
Chr4-123532-12353100-12353200	2.34569	29.143	2.08912e-34	3.33172e-30	536.165	878.797	601.887	2972.59	3765.8	3514.86	Hyper
Chr4-126252-12625100-12625200	2.70677	23.6994	6.7717e-17	3.65276e-13	5.57417	7.40857	4.60904	37.2103	45.1685	34.5441	Hyper
Chr4-15282-1528100-1528200	2.45068	24.9833	7.24945e-10	2.37421e-06	25.4321	12.7004	13.0138	59.3481	145.116	76.8151	Hyper
Chr4-20737-2073600-2073700	2.2522	22.3074	9.82818e-09	2.73106e-05	6.61933	2.11673	3.52456	16.4856	19.7012	23.6354	Hyper
Chr4-20738-2073700-2073800	2.16203	22.2558	6.82589e-08	0.00017632	4.18063	5.29183	2.7112	19.3117	19.7012	16.8175	Hyper
Chr4-26260-2625900-2626000	2.3215	22.5624	2.29338e-10	8.01158e-07	23.6902	27.8703	22.503	94.6744	180.674	96.3597	Hyper
Chr4-3699-369800-369900	3.53104	28.5534	1.6492e-84	3.02465e-79	317.031	276.586	306.908	3620.24	3172.85	3620.76	Hyper
Chr4-4344-434300-434400	2.20657	20.4876	1.42986e-05	0.0270348	3.83224	2.11673	2.44008	14.1305	9.1298	16.8175	Hyper
Chr4-55611-5561000-5561100	2.32983	21.2688	3.91136e-06	0.00792649	2.09031	2.46952	2.7112	14.1305	13.935	9.9996	Hyper
Chr4-71723-7172200-7172300	2.7996	23.138	2.73736e-10	9.29693e-07	1.04516	4.23347	3.79568	21.1958	19.2206	24.999	Hyper
Chr4-78788-7878700-7878800	2.23452	27.0414	5.01765e-34	7.66869e-30	399.598	408.882	418.338	1693.78	2544.81	1536.3	Hyper
Chr4-78853-7885200-7885300	3.60437	23.5793	6.47032e-27	6.24559e-23	8.36125	5.64462	8.1336	92.3193	71.5969	109.541	Hyper
Chr4-78854-7885300-7885400	3.05816	23.394	4.72078e-13	2.01348e-09	10.8	7.05578	5.69352	63.1163	64.8697	70.9062	Hyper
Chr4-78906-7890500-7890600	2.23554	22.6566	3.17429e-09	9.46615e-06	9.05802	5.64462	8.67584	27.79	43.2464	40.4529	Hyper
Chr4-79074-7907300-7907400	2.98617	23.9794	1.28531e-63	9.42911e-59	18.8128	14.1116	20.0629	156.378	129.259	136.813	Hyper
Chr4-9834-983300-983400	1.86946	21.503	4.96758e-07	0.00116058	5.92255	3.88068	5.69352	20.7247	18.2596	18.6356	Hyper
Chr5-117687-11768600-11768700	2.94466	20.7808	1.69403e-08	4.56891e-05	2.09031	1.76394	1.3556	12.2464	15.3765	14.9994	Hyper
Chr5-136119-13611800-13611900	2.71391	28.1417	2.68091e-28	2.65774e-24	239.689	157.697	316.126	1408.81	1532.85	1741.75	Hyper
Chr5-154320-15431900-15432000	3.50806	20.4606	2.07837e-05	0.0381175	1.04516	0.352789	0.27112	8.4783	5.76619	8.63601	Hyper
Chr5-155559-15555800-15555900	2.42632	21.8964	2.06296e-06	0.00434884	2.09031	2.46952	2.98232	19.3117	11.0519	11.8177	Hyper
Chr5-155560-15555900-15556000	2.11386	21.0718	1.7113e-05	0.0318633	2.78708	2.46952	2.98232	16.0146	8.16877	12.7268	Hyper
Chr5-155564-15556300-15556400	2.22309	21.9476	7.88224e-08	0.000199395	6.27094	5.29183	3.52456	14.1305	24.5063	33.1805	Hyper
Chr5-158917-15891600-15891700	2.69183	21.5986	6.19736e-07	0.00140321	2.4387	1.41116	1.89784	9.42034	12.4934	17.272	Hyper
Chr5-166605-16660400-16660500	2.82746	27.4246	4.43722e-50	1.35632e-45	464.398	498.138	411.289	2796.9	3809.05	3148.05	Hyper
Chr5-167756-16775500-16775600	1.29249	28.1857	1.01028e-07	0.000250386	112.877	55.0351	59.1042	162.501	210.947	183.174	Hyper
Chr5-178337-17833600-17833700	2.95873	21.2114	5.30214e-13	2.22706e-09	4.8774	3.88068	2.98232	22.6088	30.753	40.4529	Hyper
Chr5-183589-18358800-18358900	3.49917	25.9018	4.48964e-17	2.49517e-13	127.161	23.2841	109.261	1285.41	715.488	939.507	Hyper
Chr5-190092-19009100-19009200	2.32383	24.566	5.26563e-15	2.44486e-11	11.8451	7.05578	6.778	39.0944	43.2464	47.7253	Hyper
Chr5-196249-19624800-19624900	4.69279	21.1057	2.82215e-08	7.34163e-05	0.348386	1.05837	0.81336	23.0798	17.2986	26.3626	Hyper
Chr5-223228-22322700-22322800	2.93286	26.1101	3.31924e-68	4.05835e-63	26.8257	35.2789	40.3969	244.929	249.388	290.897	Hyper
Chr5-223229-22322800-22322900	2.57055	24.6411	2.66778e-31	2.96529e-27	46.6837	43.0402	46.0904	227.03	290.712	290.897	Hyper
Chr5-225971-22597000-22597100	2.58564	20.3524	9.95964e-09	2.74678e-05	4.52901	2.46952	1.3556	17.4276	17.7791	16.8175	Hyper
Chr5-243097-24309600-24309700	2.64278	20.5481	1.24939e-05	0.0238686	1.04516	1.41116	1.89784	9.42034	12.0129	7.72696	Hyper
Chr5-249626-24962500-24962600	3.23756	26.4644	1.53557e-32	2.01161e-28	40.4127	17.2867	44.4637	301.451	333.959	331.35	Hyper
Chr5-264116-26411500-26411600	1.93931	21.4329	2.58747e-05	0.046524	4.52901	8.11414	3.25344	16.4856	26.9089	18.6356	Hyper
Chr5-264117-26411600-26411700	2.58158	23.1162	6.14216e-07	0.00139935	4.52901	5.29183	4.88016	33.4422	26.4284	29.9988	Hyper
Chr5-265696-26569500-26569600	3.21474	20.8955	1.92155e-17	1.08435e-13	3.83224	2.82231	2.98232	28.732	37.4803	26.3626	Hyper
Chr5-28388-2838700-2838800	3.04585	27.1138	5.34297e-13	2.22706e-09	11.1483	11.2892	5.96464	89.0222	35.0777	113.177	Hyper
Chr5-2876-287500-287600	2.4794	25.2056	1.00727e-08	2.75722e-05	7.3161	11.2892	7.04912	49.9278	22.5843	72.2698	Hyper
Chr5-33434-3343300-3343400	2.56128	20.6049	9.09921e-09	2.54779e-05	2.09031	3.1751	3.52456	18.3697	14.896	20.4537	Hyper
Chr5-34568-3456700-3456800	2.51018	26.4879	2.3391e-18	1.40654e-14	185.69	111.128	229.096	972.179	938.448	1087.23	Hyper
Chr5-46948-4694700-4694800	3.46659	30.5315	2.63715e-09	7.99431e-06	474.85	138.999	519.195	3131.79	4960.85	4436.64	Hyper
Chr5-77407-7740600-7740700	2.94436	27.9349	4.54471e-57	1.85223e-52	104.864	77.6135	122.275	739.968	642.45	965.87	Hyper
Chr5-79350-7934900-7935000	2.60993	22.2995	1.61885e-11	6.2505e-08	3.48386	3.88068	4.33792	23.5508	21.6232	28.1807	Hyper
Chr5-31111-3111000-3111100	-1.83916	26.5325	1.76471e-32	2.23207e-28	533.727	631.845	585.077	146.486	156.168	186.356	Hypo

## Sheet: 22nt
Supplementary File 1. Lists of differential small RNA regions (DSR) in the MBP vs. TP comparison
Notes: DSRs are listed for each sRNA size class in four layers
MBP: membrane-bound polysomes; TP: total polysomes; The three biological replicates for TP and MBP are denoted by numbers. Hyper DSR: MBP>TP; Hypo DSR: MBP<TP
Small RNA abundance is in RPMR (reads per million 45S rRNA fragments)
Window	logFC	logCPM	PValue	FDR	TP-1	TP-2	TP-3	MBP-1	MBP-2	MBP-3	DSR	MIR
Chr1-104788-10478700-10478800	1.25309	21.4427	5.55658e-07	0.00144719	11.8451	16.2283	16.8094	37.6814	30.2725	39.5439	Hyper	-
Chr1-111376-11137500-11137600	2.56643	29.0749	1.35816e-31	3.25429e-27	683.881	504.488	609.749	2994.25	3955.13	3703.49	Hyper	ath-miR167d
Chr1-130674-13067300-13067400	3.26469	22.5733	1.8804e-13	9.79485e-10	2.78708	2.46952	3.25344	27.319	33.1556	24.5445	Hyper	ath-miR773a
Chr1-155336-15533500-15533600	3.96583	20.2203	8.31626e-07	0.00211986	0.348386	0.352789	0.54224	9.42034	9.1298	6.36338	Hyper	-
Chr1-163597-16359600-16359700	2.49064	21.4176	1.40966e-07	0.00041529	2.78708	3.52789	1.62672	14.6015	15.857	15.9084	Hyper	-
Chr1-163659-16365800-16365900	2.80334	21.6182	3.49696e-06	0.00805682	0.696771	2.11673	1.3556	9.89136	10.0908	11.3632	Hyper	-
Chr1-163852-16385100-16385200	3.22008	19.8868	4.87964e-07	0.00130348	1.39354	0.352789	1.3556	10.3624	13.935	7.72696	Hyper	-
Chr1-165140-16513900-16514000	2.10051	21.5403	3.79277e-07	0.0010486	5.22578	4.23347	4.33792	17.8986	21.1427	21.3628	Hyper	-
Chr1-165142-16514100-16514200	3.27357	20.3872	3.70407e-08	0.000115765	1.39354	1.41116	0.54224	15.0725	10.0908	10.4541	Hyper	-
Chr1-165144-16514300-16514400	5.7084	20.306	4.12622e-06	0.00932723	0	0	0	5.18119	7.68826	6.36338	Hyper	-
Chr1-165145-16514400-16514500	3.9657	20.8137	1.24096e-11	5.57526e-08	1.74193	1.05837	0	12.7175	19.7012	16.8175	Hyper	-
Chr1-165149-16514800-16514900	2.24156	21.6271	1.76383e-12	8.56687e-09	6.96771	6.70299	8.40472	33.9132	43.2464	28.6352	Hyper	-
Chr1-165240-16523900-16524000	1.90259	20.2675	2.49036e-05	0.0475081	5.22578	3.1751	2.44008	10.8334	13.4544	17.272	Hyper	-
Chr1-178258-17825700-17825800	3.50179	25.2454	1.08343e-39	4.86751e-35	58.5288	83.2582	50.6994	704.641	843.786	635.883	Hyper	ath-miR161
Chr1-185494-18549300-18549400	2.33292	21.0419	1.44299e-05	0.0296362	1.39354	3.1751	1.62672	8.94932	11.0519	12.7268	Hyper	-
Chr1-185495-18549400-18549500	2.63413	22.7977	2.58858e-16	1.82427e-12	6.96771	4.58625	5.15128	29.6741	35.0777	40.9074	Hyper	-
Chr1-185496-18549500-18549600	2.9311	23.6171	7.58315e-20	6.98847e-16	6.61933	6.3502	7.32024	49.4568	51.4152	56.3614	Hyper	-
Chr1-217664-21766300-21766400	3.20691	20.3323	2.33548e-07	0.000660952	1.04516	1.41116	0.81336	13.1885	10.0908	9.9996	Hyper	-
Chr1-217850-21784900-21785000	3.02631	20.3173	2.59557e-06	0.00610813	1.04516	1.05837	1.08448	9.42034	11.0519	8.18149	Hyper	-
Chr1-232999-23299800-23299900	2.83368	20.5584	2.58411e-07	0.000725601	1.04516	2.11673	1.89784	11.3044	12.9739	14.0903	Hyper	-
Chr1-233895-23389400-23389500	2.49353	20.4928	1.71132e-05	0.03475	2.09031	1.05837	2.7112	13.6595	11.5324	9.54507	Hyper	-
Chr1-233899-23389800-23389900	2.60661	21.1232	8.67797e-10	3.42747e-06	3.13547	1.76394	4.60904	16.4856	19.7012	23.6354	Hyper	-
Chr1-234204-23420300-23420400	2.07484	21.4575	1.30729e-11	5.80075e-08	10.1032	10.2309	8.40472	32.9712	46.1295	43.1801	Hyper	-
Chr1-247212-24721100-24721200	2.39621	24.0584	2.74549e-18	2.14516e-14	32.3999	27.1647	24.943	128.588	171.064	146.812	Hyper	-
Chr1-247213-24721200-24721300	2.68122	23.1966	1.0934e-11	4.97448e-08	5.22578	5.64462	3.25344	22.6088	42.2854	27.7262	Hyper	-
Chr1-247214-24721300-24721400	2.88905	23.2755	1.60879e-18	1.37673e-14	5.22578	7.05578	5.69352	44.2756	49.0126	42.271	Hyper	-
Chr1-249133-24913200-24913300	3.47627	21.4777	2.38293e-09	8.73943e-06	1.74193	2.82231	0.81336	22.6088	19.2206	21.8173	Hyper	ath-miR157a
Chr1-277133-27713200-27713300	2.10147	23.0111	2.36777e-06	0.00571151	15.329	27.5175	12.7426	46.1597	151.363	42.271	Hyper	ath-miR159a
Chr1-294226-29422500-29422600	3.10482	21.8315	5.62661e-26	7.77805e-22	3.48386	4.23347	8.40472	46.1597	40.8439	54.5432	Hyper	ath-miR775
Chr1-295253-29525200-29525300	3.11737	22.3969	1.86528e-08	6.03973e-05	3.13547	1.76394	0.54224	10.3624	28.831	10.9086	Hyper	ath-miR833a,ath-miR833b
Chr1-41822-4182100-4182200	4.10216	21.8299	3.38841e-21	3.29148e-17	1.04516	1.41116	2.44008	30.1451	25.4673	34.5441	Hyper	ath-miR472
Chr1-62209-6220800-6220900	2.7754	26.8526	4.98767e-31	1.0545e-26	52.6062	77.6135	56.1219	341.016	550.191	386.803	Hyper	ath-miR159b
Chr1-69269-6926800-6926900	3.12721	25.7012	4.94182e-15	3.11609e-11	10.8	10.2309	8.94696	77.7178	98.0253	89.0873	Hyper	-
Chr1-790-78900-79000	2.62825	24.5211	1.82057e-31	4.08965e-27	19.858	28.2231	27.112	155.436	135.506	175.902	Hyper	ath-miR165a
Chr2-111598-11159700-11159800	2.02731	22.3761	7.35068e-07	0.00188711	4.52901	4.23347	4.33792	17.4276	22.5843	14.5449	Hyper	ath-miR825
Chr2-117220-11721900-11722000	2.84542	24.7851	6.85539e-29	1.29681e-24	20.5547	21.5201	18.7073	125.762	155.687	157.721	Hyper	-
Chr2-165376-16537500-16537600	2.70997	22.0063	4.65861e-13	2.39197e-09	2.09031	5.64462	3.52456	22.6088	24.5063	28.6352	Hyper	-
Chr2-165377-16537600-16537700	2.24112	23.7239	2.65994e-15	1.77042e-11	10.8	8.11414	10.0314	40.0364	50.9347	47.2708	Hyper	-
Chr2-165378-16537700-16537800	2.1854	27.1761	7.12531e-25	8.83086e-21	90.9286	95.253	119.022	406.959	468.984	513.616	Hyper	-
Chr2-165379-16537800-16537900	2.2936	25.5214	4.12224e-23	4.63e-19	16.0257	26.4592	19.7918	86.6671	120.129	99.996	Hyper	-
Chr2-165398-16539700-16539800	2.68648	24.2304	8.57492e-37	2.80179e-32	21.2515	21.5201	30.6366	134.24	174.908	165.448	Hyper	-
Chr2-165399-16539800-16539900	2.07822	26.7015	1.3619e-27	2.22494e-23	126.464	133.707	145.32	552.503	557.879	603.157	Hyper	-
Chr2-170299-17029800-17029900	2.11409	26.4426	1.20011e-23	1.39142e-19	88.4899	112.54	98.4166	397.067	439.192	461.345	Hyper	ath-miR319c
Chr2-19-1800-1900	3.49932	22.2981	3.53852e-15	2.31237e-11	6.27094	4.58625	2.98232	51.8119	49.0126	59.543	Hyper	-
Chr2-191763-19176200-19176300	3.87034	28.7866	4.31922e-41	2.21771e-36	263.728	177.806	331.038	4308.39	3104.61	3890.75	Hyper	ath-miR166a
Chr2-193200-19319900-19320000	3.17457	22.0759	1.90208e-41	1.1394e-36	8.70964	5.64462	10.3026	74.4207	73.0384	78.1787	Hyper	ath-miR408
Chr2-194152-19415100-19415200	2.28276	27.1977	1.61216e-26	2.51928e-22	206.941	215.201	262.715	1100.77	986.019	1247.22	Hyper	ath-miR403
Chr2-20-1900-2000	3.15807	19.7599	2.24796e-05	0.0435472	0.696771	0.705578	0.81336	8.4783	3.36361	10.9086	Hyper	-
Chr2-21849-2184800-2184900	2.61737	22.0668	1.95976e-12	9.39161e-09	6.61933	4.58625	5.4224	40.5075	30.2725	33.1805	Hyper	-
Chr2-22230-2222900-2223000	3.0587	21.2671	8.58614e-06	0.018369	1.04516	1.05837	0.81336	10.8334	5.76619	10.4541	Hyper	-
Chr2-25390-2538900-2539000	3.78256	20.7581	2.99794e-06	0.00695165	1.04516	0	0.27112	7.53627	6.72722	8.63601	Hyper	-
Chr2-25393-2539200-2539300	3.45436	21.0369	2.96628e-09	1.06613e-05	1.39354	1.41116	0.81336	11.3044	13.4544	18.6356	Hyper	-
Chr2-26047-2604600-2604700	2.99101	23.3279	9.73502e-28	1.66615e-23	9.7548	8.81972	8.1336	65.0003	66.3112	83.633	Hyper	-
Chr2-26048-2604700-2604800	2.18293	21.6849	1.53589e-05	0.0313651	2.4387	2.46952	2.44008	13.1885	11.0519	10.4541	Hyper	-
Chr2-26049-2604800-2604900	3.10339	23.3526	6.93508e-21	6.55942e-17	2.78708	3.1751	6.50688	33.4422	37.4803	39.0893	Hyper	-
Chr2-26051-2605000-2605100	2.65237	22.4287	4.33081e-12	1.99559e-08	3.48386	3.52789	4.0668	22.6088	24.0258	24.999	Hyper	-
Chr2-26054-2605300-2605400	4.31186	21.4976	4.26689e-07	0.00117068	0.696771	0	0.27112	8.4783	10.0908	7.72696	Hyper	-
Chr2-26058-2605700-2605800	2.73936	22.4476	3.8925e-09	1.37159e-05	2.4387	3.1751	3.52456	15.5436	23.0648	24.5445	Hyper	-
Chr2-26062-2606100-2606200	2.85427	22.7619	5.13416e-15	3.18155e-11	4.52901	3.1751	4.88016	30.1451	25.4673	37.7257	Hyper	-
Chr2-26066-2606500-2606600	2.75999	22.39	3.82976e-17	2.86766e-13	6.27094	2.46952	5.69352	32.5002	28.3504	39.0893	Hyper	-
Chr2-30075-3007400-3007500	3.43376	19.7073	4.896e-07	0.00130348	0.696771	1.05837	0.54224	6.59424	10.0908	11.8177	Hyper	-
Chr2-32541-3254000-3254100	2.92237	20.5296	1.05274e-07	0.00031531	2.4387	0.705578	1.3556	13.6595	12.0129	10.9086	Hyper	-
Chr2-32545-3254400-3254500	2.73204	21.1491	4.3362e-09	1.49856e-05	2.78708	2.46952	1.89784	16.0146	16.8181	16.8175	Hyper	-
Chr2-32698-3269700-3269800	4.67902	20.3533	2.19378e-09	8.12867e-06	0.348386	0.352789	0.27112	11.7754	10.0908	12.2722	Hyper	-
Chr2-32744-3274300-3274400	3.51502	20.8302	4.30357e-14	2.45519e-10	1.04516	1.76394	2.44008	19.3117	26.4284	18.1811	Hyper	-
Chr2-33107-3310600-3310700	2.92605	20.6943	4.72232e-06	0.010608	1.04516	0.705578	1.62672	10.8334	9.1298	8.18149	Hyper	-
Chr2-33368-3336700-3336800	2.95755	20.749	1.39298e-08	4.63574e-05	2.09031	1.76394	1.3556	11.7754	14.4155	16.8175	Hyper	-
Chr2-33386-3338500-3338600	2.75644	21.9417	9.85054e-15	5.90073e-11	5.22578	6.70299	5.4224	40.9785	46.6101	31.8169	Hyper	-
Chr2-33694-3369300-3369400	3.16476	22.0435	6.28085e-06	0.0137649	0.348386	1.41116	1.08448	12.2464	6.24671	9.9996	Hyper	-
Chr2-34117-3411600-3411700	3.14718	20.4554	3.44641e-10	1.42379e-06	1.39354	1.41116	2.7112	18.8407	12.9739	19.9992	Hyper	-
Chr2-34179-3417800-3417900	4.82273	19.3626	1.96425e-06	0.00477015	0.348386	0	0	6.12322	6.24671	7.72696	Hyper	-
Chr2-34262-3426100-3426200	3.91226	22.8421	5.2067e-39	2.0793e-34	9.05802	7.76135	7.86248	107.392	133.583	135.904	Hyper	-
Chr2-34673-3467200-3467300	1.46913	21.9844	1.14345e-06	0.00287394	15.329	9.87809	14.6405	40.0364	42.7659	28.1807	Hyper	-
Chr2-35022-3502100-3502200	2.31296	21.954	2.02489e-05	0.0397693	2.4387	2.11673	2.98232	11.7754	14.896	12.2722	Hyper	-
Chr2-35036-3503500-3503600	2.64988	21.3123	1.23383e-05	0.0256335	1.74193	1.76394	0.81336	11.7754	9.1298	8.18149	Hyper	-
Chr2-69747-6974600-6974700	3.03853	21.5945	1.31353e-09	5.00757e-06	1.04516	2.11673	2.16896	16.0146	9.1298	21.3628	Hyper	-
Chr3-114383-11438200-11438300	2.57597	20.7416	1.96146e-05	0.0391528	1.74193	1.05837	1.62672	10.3624	11.5324	6.36338	Hyper	-
Chr3-122431-12243000-12243100	2.75804	21.2383	1.4256e-07	0.000416571	1.74193	1.76394	1.89784	12.7175	10.0908	15.9084	Hyper	-
Chr3-123876-12387500-12387600	3.15545	19.9032	1.9844e-05	0.0391881	1.74193	0	0.54224	8.00729	5.76619	9.54507	Hyper	-
Chr3-134148-13414700-13414800	2.57789	20.4884	2.49014e-06	0.00596663	2.4387	1.05837	1.89784	8.4783	11.0519	14.5449	Hyper	-
Chr3-134156-13415500-13415600	4.11289	21.5923	2.56821e-22	2.71487e-18	3.13547	0.352789	1.62672	30.6161	23.5453	40.4529	Hyper	-
Chr3-135921-13592000-13592100	4.05667	19.9961	1.36718e-06	0.00336565	0	1.05837	0.54224	9.89136	6.24671	16.363	Hyper	-
Chr3-141958-14195700-14195800	3.20173	22.046	4.60224e-07	0.0012437	4.8774	1.05837	2.16896	16.9566	37.9608	22.7264	Hyper	-
Chr3-141961-14196000-14196100	2.39941	21.1098	1.32359e-09	5.00757e-06	4.52901	3.1751	4.33792	20.2537	23.0648	21.8173	Hyper	-
Chr3-141996-14199500-14199600	2.02541	21.7818	4.96534e-14	2.74558e-10	11.1483	9.17251	8.1336	39.5654	36.5192	40.9074	Hyper	-
Chr3-153042-15304100-15304200	3.68569	20.4835	1.33933e-08	4.49885e-05	1.04516	1.05837	0.54224	17.8986	11.0519	9.54507	Hyper	-
Chr3-156337-15633600-15633700	2.58323	21.5122	1.97171e-05	0.0391528	1.04516	1.76394	1.62672	8.94932	7.68826	11.8177	Hyper	-
Chr3-156340-15633900-15634000	2.36943	21.5958	4.33391e-08	0.000134282	5.22578	3.1751	1.62672	12.7175	20.6622	19.9992	Hyper	-
Chr3-156352-15635100-15635200	2.21352	21.7011	1.64926e-07	0.00047804	2.78708	4.93904	2.7112	15.0725	19.7012	14.9994	Hyper	-
Chr3-156353-15635200-15635300	2.72807	21.5034	1.10136e-05	0.0231489	0.348386	1.76394	1.89784	9.42034	11.5324	7.72696	Hyper	-
Chr3-156878-15687700-15687800	3.10002	20.8678	1.06086e-05	0.0224289	0	1.05837	1.3556	6.12322	11.0519	6.36338	Hyper	-
Chr3-161591-16159000-16159100	3.30904	20.9667	4.4977e-14	2.52585e-10	2.78708	1.76394	1.89784	22.6088	18.7401	25.908	Hyper	-
Chr3-161594-16159300-16159400	1.8497	23.3306	5.80433e-07	0.00150084	4.18063	7.05578	5.4224	20.2537	22.5843	18.1811	Hyper	-
Chr3-161596-16159500-16159600	2.92723	20.9132	2.59761e-06	0.00610813	1.74193	0.352789	1.3556	9.89136	12.0129	6.81791	Hyper	-
Chr3-161597-16159600-16159700	2.9828	21.1112	2.64267e-12	1.24976e-08	2.4387	3.52789	3.79568	32.9712	16.3375	30.4533	Hyper	-
Chr3-161598-16159700-16159800	2.07691	25.5273	9.82592e-19	8.82898e-15	169.315	121.359	201.713	713.591	564.126	800.877	Hyper	-
Chr3-161599-16159800-16159900	3.36181	22.1271	3.98213e-22	4.08926e-18	3.13547	2.82231	4.33792	33.4422	33.1556	42.7255	Hyper	-
Chr3-161601-16160000-16160100	3.84598	22.1893	3.48281e-34	1.04315e-29	2.78708	2.11673	5.4224	51.3408	48.5321	53.6342	Hyper	-
Chr3-161602-16160100-16160200	2.65282	25.3071	5.36188e-43	3.85429e-38	148.412	86.4333	112.515	684.388	771.709	730.425	Hyper	-
Chr3-161604-16160300-16160400	2.41568	23.0487	2.15831e-18	1.80403e-14	11.4967	13.0532	11.6582	51.8119	72.5579	70.4517	Hyper	-
Chr3-161605-16160400-16160500	2.4165	22.6319	7.78574e-14	4.23988e-10	4.18063	6.3502	6.50688	26.848	38.9218	26.8171	Hyper	-
Chr3-161606-16160500-16160600	2.35212	23.3821	9.34989e-08	0.000282395	2.78708	2.82231	5.96464	15.5436	26.9089	18.1811	Hyper	-
Chr3-161607-16160600-16160700	3.07484	22.2484	1.77381e-14	1.04514e-10	3.48386	2.11673	3.25344	19.3117	31.7141	26.3626	Hyper	-
Chr3-161608-16160700-16160800	3.1234	21.0507	3.18533e-08	0.000101315	1.74193	0	2.44008	12.2464	13.4544	13.6358	Hyper	-
Chr3-161609-16160800-16160900	2.31861	21.8624	8.97037e-11	3.79305e-07	4.18063	4.93904	5.15128	24.4929	25.4673	22.7264	Hyper	-
Chr3-161610-16160900-16161000	3.2456	21.1732	2.19076e-10	9.15574e-07	1.74193	0.705578	2.44008	15.0725	15.3765	19.0901	Hyper	-
Chr3-161612-16161100-16161200	3.99577	19.8274	5.82303e-06	0.0128398	0.348386	0.705578	0	6.12322	7.20774	9.09054	Hyper	-
Chr3-177757-17775600-17775700	2.62065	20.819	7.49523e-06	0.0161312	1.04516	2.46952	1.3556	10.8334	11.0519	9.9996	Hyper	-
Chr3-188108-18810700-18810800	1.79755	22.7646	5.99536e-11	2.62784e-07	15.329	15.5227	14.6405	52.2829	49.9737	56.8159	Hyper	-
Chr3-19596-1959500-1959600	3.62881	19.7634	7.02646e-06	0.0152134	1.04516	0.352789	0	10.3624	5.28568	5.90885	Hyper	-
Chr3-19640-1963900-1964000	2.34972	23.3475	1.42429e-18	1.24857e-14	10.1032	8.46693	11.1159	48.9858	54.7788	49.0889	Hyper	-
Chr3-19641-1964000-1964100	3.05451	24.0402	6.06384e-25	7.78371e-21	11.4967	6.70299	6.778	65.0003	72.0774	73.1789	Hyper	-
Chr3-19647-1964600-1964700	2.15303	24.4106	1.60576e-08	5.24669e-05	3.83224	5.64462	4.33792	18.8407	21.6232	22.2718	Hyper	-
Chr3-19649-1964800-1964900	2.8256	25.649	1.19337e-12	5.95718e-09	8.70964	8.81972	8.94696	67.3554	65.3502	57.2704	Hyper	-
Chr3-19653-1965200-1965300	2.90691	23.9985	4.05659e-33	1.12154e-28	10.1032	12.3476	6.778	73.4786	67.2722	80.9058	Hyper	-
Chr3-19654-1965300-1965400	2.55807	23.2657	3.55776e-07	0.000991251	2.78708	3.88068	1.3556	15.0725	15.3765	18.6356	Hyper	-
Chr3-19657-1965600-1965700	2.97129	24.0902	1.02985e-08	3.52518e-05	2.4387	1.05837	3.52456	18.8407	19.7012	19.0901	Hyper	-
Chr3-19664-1966300-1966400	3.21063	24.378	1.74896e-07	0.000502884	0.348386	2.11673	1.3556	19.3117	9.61032	9.54507	Hyper	-
Chr3-19668-1966700-1966800	2.2085	23.4158	3.7763e-16	2.61012e-12	11.1483	10.9365	10.5737	41.4495	49.4932	61.3612	Hyper	-
Chr3-19669-1966800-1966900	3.35067	23.306	3.84733e-12	1.79584e-08	2.4387	1.41116	1.62672	15.0725	19.7012	24.5445	Hyper	-
Chr3-19674-1967300-1967400	2.25755	24.406	1.23162e-12	6.06388e-09	13.9354	11.9948	11.9293	51.3408	71.1164	59.9976	Hyper	-
Chr3-19675-1967400-1967500	1.28783	25.3361	8.4549e-10	3.37647e-06	49.4708	68.0882	49.3438	132.356	147.518	128.177	Hyper	-
Chr3-19676-1967500-1967600	2.49998	25.0503	9.70832e-15	5.90073e-11	4.52901	6.70299	6.50688	35.3263	32.6751	34.0895	Hyper	-
Chr3-19677-1967600-1967700	3.19553	26.4657	2.30071e-18	1.87934e-14	7.66448	9.87809	7.32024	67.3554	98.0253	65.4519	Hyper	-
Chr3-19678-1967700-1967800	2.97456	25.0958	4.10393e-10	1.67616e-06	2.78708	1.05837	4.0668	17.4276	26.4284	20.9082	Hyper	-
Chr3-19679-1967800-1967900	2.25112	25.9423	2.66639e-25	3.54942e-21	23.6902	22.9313	27.6542	85.2541	155.207	114.541	Hyper	-
Chr3-19682-1968100-1968200	3.05825	22.4807	2.35228e-05	0.0452111	1.04516	1.41116	0	8.94932	11.5324	2.72716	Hyper	-
Chr3-19685-1968400-1968500	2.99175	23.3263	1.84551e-09	6.90943e-06	2.09031	1.41116	4.0668	21.6668	21.1427	19.9992	Hyper	-
Chr3-19693-1969200-1969300	2.60314	26.2229	1.11896e-32	2.87267e-28	65.1481	53.6239	63.7132	305.69	404.114	400.893	Hyper	-
Chr3-19694-1969300-1969400	2.62515	25.9814	1.82166e-24	2.18245e-20	21.5999	18.6978	14.9116	94.6744	120.61	127.268	Hyper	-
Chr3-19695-1969400-1969500	2.45704	24.2428	4.4265e-08	0.000135979	3.13547	2.82231	3.25344	12.7175	16.8181	22.7264	Hyper	-
Chr3-19698-1969700-1969800	2.44651	24.1074	2.39918e-08	7.69916e-05	3.83224	3.88068	2.98232	16.9566	22.1037	20.9082	Hyper	-
Chr3-19699-1969800-1969900	2.38581	24.5283	6.17913e-22	6.16911e-18	14.6322	12.3476	15.725	66.8844	78.8046	79.0877	Hyper	-
Chr3-19700-1969900-1970000	2.17146	22.4916	2.49823e-05	0.0475081	2.78708	2.82231	2.98232	11.3044	18.2596	10.4541	Hyper	-
Chr3-206917-20691600-20691700	1.8525	21.615	1.05471e-08	3.57623e-05	6.96771	5.99741	8.67584	23.0798	27.8699	28.1807	Hyper	ath-miR393b
Chr3-33664-3366300-3366400	2.48001	23.9874	3.20389e-69	5.75764e-64	28.5676	27.5175	33.0766	149.783	173.466	175.902	Hyper	ath-miR158a
Chr3-53872-5387100-5387200	4.11278	21.461	7.30983e-38	2.62727e-33	3.13547	3.1751	2.98232	55.58	49.4932	61.8157	Hyper	-
Chr3-58621-5862000-5862100	2.21787	21.4436	7.36212e-10	2.9731e-06	4.18063	4.58625	6.23576	22.1378	24.0258	24.999	Hyper	-
Chr3-58622-5862100-5862200	1.82344	23.194	9.41851e-13	4.76783e-09	12.1935	11.642	10.3026	40.0364	49.0126	32.7259	Hyper	-
Chr3-58623-5862200-5862300	2.3585	25.2438	1.42338e-64	1.70529e-59	90.2319	95.253	91.6386	433.336	493.97	495.435	Hyper	-
Chr3-58624-5862300-5862400	3.29449	24.4256	8.6721e-11	3.71058e-07	2.4387	0.705578	2.44008	18.3697	20.1817	19.5447	Hyper	-
Chr3-62447-6244600-6244700	2.95139	28.2579	1.23276e-28	2.21537e-24	341.418	371.839	369.808	2573.64	2860.51	2945.79	Hyper	ath-miR157c
Chr3-82362-8236100-8236200	1.73806	24.0115	4.78976e-06	0.0106927	7.3161	4.93904	7.86248	24.4929	22.5843	20.9082	Hyper	ath-miR173
Chr3-94178-9417700-9417800	2.9359	19.7726	3.68295e-06	0.00839323	1.04516	1.05837	1.62672	8.94932	13.4544	8.63601	Hyper	-
Chr4-105787-10578600-10578700	3.78381	25.7626	1.3469e-69	4.84097e-64	44.9417	35.2789	43.1081	602.902	515.113	585.431	Hyper	ath-miR168a
Chr4-123532-12353100-12353200	2.41567	26.0853	2.73301e-18	2.14516e-14	10.1032	13.0532	14.9116	65.9424	78.8046	59.9976	Hyper	ath-miR319a
Chr4-15282-1528100-1528200	3.10566	22.5873	3.47274e-09	1.2358e-05	3.83224	2.46952	1.08448	16.4856	32.6751	17.272	Hyper	ath-miR447a
Chr4-16207-1620600-1620700	3.12827	19.6754	4.48784e-07	0.00122197	0	1.41116	1.89784	13.1885	8.64929	9.9996	Hyper	-
Chr4-16580-1657900-1658000	3.11282	20.3359	2.05634e-07	0.000586574	1.74193	1.05837	1.08448	9.89136	12.4934	14.0903	Hyper	-
Chr4-20481-2048000-2048100	2.75055	21.0427	1.40922e-08	4.64675e-05	2.78708	2.11673	1.89784	14.1305	19.7012	14.0903	Hyper	-
Chr4-20736-2073500-2073600	2.54755	21.9049	1.0597e-06	0.00268219	2.09031	1.05837	3.25344	14.1305	10.5714	14.5449	Hyper	-
Chr4-20737-2073600-2073700	2.47219	24.3555	6.04238e-29	1.20651e-24	25.7805	20.4618	22.7741	121.051	125.895	137.722	Hyper	-
Chr4-20738-2073700-2073800	2.76668	23.5986	7.98491e-16	5.41491e-12	5.22578	3.52789	5.4224	37.2103	35.0777	26.3626	Hyper	-
Chr4-20739-2073800-2073900	2.03929	22.2891	1.2367e-06	0.00308673	5.22578	3.1751	3.52456	14.6015	19.2206	16.363	Hyper	-
Chr4-20762-2076100-2076200	2.6749	21.574	1.34513e-05	0.0277851	1.39354	0.705578	2.44008	8.00729	13.4544	9.54507	Hyper	-
Chr4-20772-2077100-2077200	2.2663	20.9857	1.27105e-06	0.00315058	1.74193	4.93904	2.16896	11.3044	16.3375	16.363	Hyper	-
Chr4-20803-2080200-2080300	3.08992	20.5606	1.0553e-05	0.0224289	1.39354	0	1.08448	9.89136	7.20774	6.81791	Hyper	-
Chr4-26260-2625900-2626000	2.27136	22.4692	2.14799e-26	3.21676e-22	36.2321	30.6926	30.0943	138.479	142.713	188.629	Hyper	ath-miR397a
Chr4-28657-2865600-2865700	2.39925	20.7124	1.88254e-06	0.00460281	2.4387	3.52789	1.08448	9.89136	13.4544	15.4539	Hyper	-
Chr4-33238-3323700-3323800	2.85948	20.9163	1.11415e-05	0.0232816	0.348386	0.352789	2.98232	10.8334	9.61032	8.63601	Hyper	-
Chr4-34649-3464800-3464900	3.75672	20.2714	4.26451e-09	1.48809e-05	1.74193	0.352789	0.54224	8.94932	17.2986	14.0903	Hyper	-
Chr4-3699-369800-369900	3.0054	24.1847	4.99723e-26	7.18434e-22	9.7548	10.2309	9.21808	77.7178	73.519	85.9056	Hyper	ath-miR165b
Chr4-55610-5560900-5561000	2.26484	24.0948	3.7318e-17	2.85376e-13	12.8903	9.5253	10.0314	51.8119	52.3762	53.1797	Hyper	-
Chr4-55611-5561000-5561100	3.37242	22.0425	1.97025e-05	0.0391528	0	1.05837	0.81336	6.59424	7.20774	9.09054	Hyper	-
Chr4-78458-7845700-7845800	3.41821	23.8821	9.77669e-14	5.1675e-10	5.22578	2.46952	4.33792	45.6886	46.1295	40.4529	Hyper	ath-miR850
Chr5-107624-10762300-10762400	3.57018	21.725	4.84987e-17	3.55739e-13	2.09031	2.46952	1.62672	26.848	21.6232	29.0897	Hyper	-
Chr5-108182-10818100-10818200	3.92007	20.379	7.33207e-08	0.000223327	0.348386	0.352789	1.08448	9.89136	11.5324	10.9086	Hyper	-
Chr5-108184-10818300-10818400	2.46487	21.2475	2.25359e-05	0.0435472	1.74193	1.76394	1.62672	11.3044	10.0908	8.63601	Hyper	-
Chr5-108198-10819700-10819800	4.1041	20.3687	2.12298e-05	0.0414691	0	0	0.81336	6.59424	5.28568	8.18149	Hyper	-
Chr5-111393-11139200-11139300	3.99691	20.8999	2.86573e-09	1.04039e-05	0	1.41116	0.81336	17.4276	9.61032	14.0903	Hyper	-
Chr5-111450-11144900-11145000	3.82688	19.9422	5.48287e-07	0.00143842	0	0	1.89784	4.71017	14.896	12.2722	Hyper	-
Chr5-117687-11768600-11768700	3.53097	21.7708	5.78699e-17	4.15987e-13	2.4387	1.76394	2.16896	28.261	21.6232	27.7262	Hyper	-
Chr5-122927-12292600-12292700	3.25329	19.8738	6.4235e-06	0.0139922	0	1.76394	0.54224	6.59424	7.68826	10.9086	Hyper	-
Chr5-130184-13018300-13018400	3.67135	20.9319	9.20072e-10	3.59444e-06	0.696771	1.41116	0.81336	10.3624	14.896	16.363	Hyper	-
Chr5-130214-13021300-13021400	3.27542	20.5258	2.60017e-06	0.00610813	1.04516	0	1.62672	8.4783	12.0129	8.63601	Hyper	-
Chr5-153345-15334400-15334500	3.2803	19.9865	5.76372e-06	0.0127875	0.348386	1.05837	0.81336	8.00729	8.64929	8.18149	Hyper	-
Chr5-166605-16660400-16660500	2.90841	22.9576	5.6775e-23	6.18359e-19	7.66448	8.46693	4.88016	59.8191	49.0126	51.3616	Hyper	ath-miR319b
Chr5-167171-16717000-16717100	3.60228	19.8803	3.49749e-08	0.000110268	0.348386	1.05837	1.08448	8.00729	9.61032	16.8175	Hyper	-
Chr5-183589-18358800-18358900	3.40838	23.0804	4.87822e-15	3.11609e-11	5.22578	0.705578	5.15128	56.993	28.831	35.4531	Hyper	ath-miR168b
Chr5-196249-19624800-19624900	3.97206	20.3634	1.88388e-05	0.038039	0.348386	0.705578	0.54224	8.94932	12.9739	8.63601	Hyper	-
Chr5-2100-209900-210000	3.0245	19.6964	2.63734e-06	0.00615522	1.04516	0.352789	1.89784	8.94932	10.0908	10.4541	Hyper	-
Chr5-211616-21161500-21161600	2.75726	20.7516	3.68968e-06	0.00839323	1.04516	1.05837	2.16896	4.71017	16.3375	9.9996	Hyper	ath-miR4245
Chr5-223229-22322800-22322900	3.11731	21.7356	3.44132e-14	1.99495e-10	3.13547	2.11673	5.15128	24.9639	42.2854	25.908	Hyper	-
Chr5-28388-2838700-2838800	4.88204	23.3669	6.03078e-59	5.4189e-54	6.27094	2.82231	3.52456	143.189	101.389	138.176	Hyper	ath-miR166c
Chr5-33434-3343300-3343400	3.27584	20.4806	8.2492e-14	4.42521e-10	3.83224	0.705578	1.89784	20.2537	23.0648	22.2718	Hyper	-
Chr5-46912-4691100-4691200	2.92388	21.5338	6.24924e-11	2.70612e-07	4.52901	1.76394	4.0668	31.5581	24.9868	24.5445	Hyper	ath-miR398b
Chr5-77407-7740600-7740700	3.29271	24.0023	1.26142e-09	4.87499e-06	1.74193	1.41116	1.08448	16.9566	11.0519	16.8175	Hyper	ath-miR162b
Chr5-97529-9752800-9752900	2.26982	22.1422	5.20232e-07	0.00137485	5.57417	2.46952	2.7112	17.8986	15.857	19.5447	Hyper	-
Chr5-31111-3111000-3111100	-1.11756	25.6564	1.25579e-07	0.000373017	63.7546	103.72	50.1572	31.0871	32.1946	36.8167	Hypo	-

## Sheet: 23nt
Supplementary File 1. Lists of differential small RNA regions (DSR) in the MBP vs. TP comparison
Notes: DSRs are listed for each sRNA size class in four layers
MBP: membrane-bound polysomes; TP: total polysomes; The three biological replicates for TP and MBP are denoted by numbers. Hyper DSR: MBP>TP; Hypo DSR: MBP<TP
Small RNA abundance is in RPMR (reads per million 45S rRNA fragments)
Window	logFC	logCPM	PValue	FDR	TP-1	TP-2	TP-3	MBP-1	MBP-2	MBP-3	DSR
Chr1-10092-1009100-1009200	4.7795	21.3881	6.50329e-08	0.00134657	0	0.705578	0.54224	8.94932	12.9739	22.2718	Hyper
Chr1-104788-10478700-10478800	1.5298	21.3819	9.13683e-10	3.09579e-05	14.6322	14.1116	11.1159	40.0364	39.4023	36.3622	Hyper
Chr1-178258-17825700-17825800	2.82321	20.9053	2.61915e-11	1.08464e-06	3.48386	2.46952	2.7112	21.6668	27.3894	14.5449	Hyper
Chr1-248844-24884300-24884400	1.63943	25.3142	9.68307e-07	0.0164043	11.8451	16.2283	13.556	41.4495	49.4932	39.5439	Hyper
Chr1-294226-29422500-29422600	2.87814	21.5916	2.47286e-08	0.000614437	3.13547	0.352789	1.89784	15.0725	10.0908	16.8175	Hyper
Chr1-40585-4058400-4058500	5.93753	19.4957	2.64319e-07	0.00518494	0	0	0	8.4783	9.1298	4.9998	Hyper
Chr2-19-1800-1900	3.26951	23.5354	2.16531e-15	1.34504e-10	11.4967	13.7588	7.04912	113.986	81.6877	119.086	Hyper
Chr2-191763-19176200-19176300	3.05646	21.2227	1.37679e-08	0.000366529	2.78708	0.705578	1.3556	16.0146	12.9739	14.0903	Hyper
Chr2-193200-19319900-19320000	2.30264	21.0052	6.89493e-10	2.5698e-05	3.83224	4.93904	4.88016	24.0219	21.6232	23.1809	Hyper
Chr2-32744-3274300-3274400	3.83382	23.6619	6.77443e-45	1.26244e-39	8.01287	9.5253	11.9293	132.356	152.804	139.994	Hyper
Chr2-33694-3369300-3369400	3.52704	21.1255	3.03998e-06	0.045321	0.696771	0.705578	0.54224	8.94932	11.0519	6.36338	Hyper
Chr2-33972-3397100-3397200	6.20711	20.8675	1.9373e-34	1.80511e-29	0.348386	0.352789	0.54224	38.6234	44.2075	36.3622	Hyper
Chr2-34262-3426100-3426200	2.70765	21.5139	5.42096e-23	4.04087e-18	6.27094	7.40857	7.59136	40.9785	51.4152	48.6344	Hyper
Chr3-141958-14195700-14195800	2.6767	23.4479	5.9793e-07	0.0106121	7.66448	4.93904	5.4224	29.203	48.5321	39.5439	Hyper
Chr3-141973-14197200-14197300	2.64575	22.2859	1.53075e-06	0.0248054	3.13547	1.76394	15.1827	49.4568	42.2854	35.9076	Hyper
Chr3-141996-14199500-14199600	2.13263	21.4265	2.3707e-11	1.08464e-06	8.01287	5.29183	6.50688	28.732	31.2335	28.1807	Hyper
Chr3-19693-1969200-1969300	2.76291	22.2881	2.30625e-09	7.16298e-05	3.83224	2.82231	2.98232	17.4276	19.7012	30.4533	Hyper
Chr3-210770-21076900-21077000	6.07248	19.6512	5.97659e-08	0.00131031	0	0	0	9.42034	8.16877	7.27243	Hyper
Chr3-53872-5387100-5387200	6.34062	22.5985	2.24097e-56	8.35226e-51	1.04516	1.05837	1.3556	101.269	84.0903	124.995	Hyper
Chr4-105787-10578600-10578700	2.55729	23.6346	2.18811e-40	2.71842e-35	21.9483	14.8171	14.3694	105.037	101.869	95.9052	Hyper
Chr5-117687-11768600-11768700	3.2401	21.2844	4.19238e-07	0.00781267	0.348386	1.05837	1.62672	12.2464	9.1298	10.4541	Hyper
Chr5-174985-17498400-17498500	2.29232	22.4143	7.31614e-09	0.000209753	4.8774	3.88068	5.4224	19.7827	21.1427	29.9988	Hyper
Chr5-223229-22322800-22322900	3.54859	21.0348	1.62865e-06	0.0252921	0.696771	0.705578	0.54224	8.94932	10.0908	7.72696	Hyper
Chr2-157223-15722200-15722300	-2.35248	23.6559	2.96502e-08	0.000690679	20.2064	33.8677	26.2986	2.8261	6.24671	6.36338	Hypo
Chr3-141977-14197600-14197700	-1.27407	22.8297	6.07774e-12	3.23603e-07	77.3416	72.3217	62.6287	33.9132	25.4673	28.1807	Hypo

## Sheet: 24nt
Supplementary File 1. Lists of differential small RNA regions (DSR) in the MBP vs. TP comparison
Notes: DSRs are listed for each sRNA size class in four layers
MBP: membrane-bound polysomes; TP: total polysomes; The three biological replicates for TP and MBP are denoted by numbers. Hyper DSR: MBP>TP; Hypo DSR: MBP<TP
Small RNA abundance is in RPMR (reads per million 45S rRNA fragments)
Window	logFC	logCPM	PValue	FDR	TP-1	TP-2	TP-3	MBP-1	MBP-2	MBP-3	DSR
Chr1-10092-1009100-1009200	4.77224	21.6167	2.13851e-06	0.0061625	0.348386	0.352789	0.27112	8.94932	12.4934	14.9994	Hyper
Chr1-104788-10478700-10478800	1.41704	21.2781	3.1425e-07	0.00121497	9.05802	12.7004	12.7426	35.7973	27.8699	29.0897	Hyper
Chr1-108145-10814400-10814500	1.25567	22.9997	8.23708e-09	4.66049e-05	18.116	17.2867	22.503	50.3988	37.4803	50.907	Hyper
Chr1-116623-11662200-11662300	1.5215	24.834	2.02882e-22	9.41272e-18	51.2127	26.4592	45.8193	116.341	122.532	116.359	Hyper
Chr1-117407-11740600-11740700	1.33987	24.9571	2.34182e-05	0.0473789	11.8451	14.8171	16.5383	32.5002	36.5192	40.9074	Hyper
Chr1-117408-11740700-11740800	1.11609	23.775	1.51039e-05	0.0331018	17.4193	21.1673	14.0982	37.2103	36.5192	40.9074	Hyper
Chr1-120412-12041100-12041200	1.76765	23.6437	2.12497e-06	0.00616178	6.61933	4.93904	7.04912	16.0146	26.4284	21.8173	Hyper
Chr1-125304-12530300-12530400	2.35302	23.3116	5.6557e-14	8.19989e-10	7.66448	3.1751	8.1336	34.3842	33.6361	30.4533	Hyper
Chr1-132595-13259400-13259500	2.3559	23.4091	4.90296e-08	0.000227473	2.4387	3.52789	4.0668	22.6088	13.935	16.363	Hyper
Chr1-141661-14166000-14166100	2.30394	21.6349	6.20016e-08	0.000282017	5.22578	2.11673	3.25344	16.9566	17.2986	19.5447	Hyper
Chr1-160256-16025500-16025600	1.74625	21.9528	1.94902e-05	0.0409163	3.48386	5.29183	4.60904	16.9566	12.0129	16.8175	Hyper
Chr1-162478-16247700-16247800	3.40718	21.4959	1.05663e-05	0.0246343	0.348386	1.05837	0.54224	8.00729	6.72722	9.54507	Hyper
Chr1-163659-16365800-16365900	1.51388	23.3746	1.32591e-06	0.00424648	9.7548	7.76135	7.86248	26.848	24.5063	21.8173	Hyper
Chr1-163663-16366200-16366300	1.59452	23.1946	8.79475e-06	0.0210327	5.92255	5.29183	8.40472	20.2537	20.6622	19.0901	Hyper
Chr1-164676-16467500-16467600	1.31196	22.959	8.02909e-06	0.0193011	17.4193	15.5227	12.7426	36.2683	41.8049	35.9076	Hyper
Chr1-165144-16514300-16514400	4.91327	21.3305	1.27849e-05	0.0290762	0	0.705578	0	9.42034	9.1298	13.6358	Hyper
Chr1-165145-16514400-16514500	2.39069	21.1953	5.91826e-06	0.0150043	7.3161	1.76394	0	8.94932	21.6232	18.6356	Hyper
Chr1-165148-16514700-16514800	1.26417	22.5669	2.27936e-06	0.00644825	17.4193	14.4643	12.7426	38.6234	33.6361	35.4531	Hyper
Chr1-165273-16527200-16527300	2.80522	19.9164	2.22535e-06	0.00637316	1.39354	2.11673	0.81336	12.2464	12.4934	7.72696	Hyper
Chr1-166459-16645800-16645900	1.73234	22.506	6.38055e-06	0.0160884	5.92255	3.52789	7.59136	17.8986	17.7791	21.8173	Hyper
Chr1-172293-17229200-17229300	1.74741	22.4421	1.79071e-06	0.00546581	4.8774	6.70299	5.69352	19.3117	17.2986	22.2718	Hyper
Chr1-173822-17382100-17382200	1.19834	24.2764	2.09113e-05	0.0433117	13.2387	15.1699	18.165	36.7393	28.3504	42.271	Hyper
Chr1-174417-17441600-17441700	1.86089	23.5354	3.9974e-21	1.42661e-16	31.3547	25.048	26.2986	91.3773	92.7396	117.268	Hyper
Chr1-174418-17441700-17441800	1.29883	22.7455	1.6777e-06	0.00518913	16.7225	9.17251	12.7426	29.6741	34.1166	31.8169	Hyper
Chr1-175251-17525000-17525100	1.61982	21.857	2.87539e-08	0.000141919	9.05802	8.11414	12.2004	31.5581	32.6751	26.8171	Hyper
Chr1-175609-17560800-17560900	1.53001	24.2567	2.37732e-07	0.000967511	8.36125	9.5253	11.387	28.261	28.3504	28.6352	Hyper
Chr1-176329-17632800-17632900	2.01355	22.3058	1.74431e-10	1.32668e-06	7.3161	7.40857	5.69352	24.4929	33.6361	25.4535	Hyper
Chr1-179791-17979000-17979100	2.20473	23.7237	1.85683e-24	1.07685e-19	25.7805	14.8171	22.503	106.921	81.6877	103.632	Hyper
Chr1-186409-18640800-18640900	2.56745	20.8206	2.25731e-05	0.0461358	0.348386	1.41116	2.98232	9.89136	9.61032	10.4541	Hyper
Chr1-186419-18641800-18641900	2.02889	21.0033	2.0722e-06	0.00612356	4.18063	3.1751	3.79568	16.0146	12.0129	18.6356	Hyper
Chr1-187698-18769700-18769800	1.29846	23.0811	1.23887e-05	0.0283141	13.2387	8.81972	11.9293	33.9132	21.1427	29.0897	Hyper
Chr1-193897-19389600-19389700	2.05474	22.1409	6.66997e-08	0.000300441	4.8774	4.23347	5.4224	20.2537	15.857	25.4535	Hyper
Chr1-197149-19714800-19714900	3.08465	20.6471	1.11312e-06	0.00371536	2.09031	0.352789	1.08448	11.3044	9.61032	11.8177	Hyper
Chr1-199816-19981500-19981600	2.84409	21.4861	1.8748e-09	1.18497e-05	2.09031	2.46952	1.89784	12.2464	18.2596	18.1811	Hyper
Chr1-203675-20367400-20367500	1.85798	23.3571	2.65888e-07	0.00106344	6.61933	3.88068	7.32024	24.4929	20.1817	20.9082	Hyper
Chr1-209703-20970200-20970300	4.6869	20.4246	1.32717e-06	0.00424648	0	0.352789	0.27112	7.53627	10.0908	7.72696	Hyper
Chr1-217106-21710500-21710600	2.02371	24.934	6.05289e-08	0.000278044	6.61933	4.23347	5.15128	20.2537	26.4284	19.5447	Hyper
Chr1-218538-21853700-21853800	1.12862	24.6298	1.10722e-09	7.33849e-06	28.2192	26.4592	29.281	61.2322	60.0645	62.7247	Hyper
Chr1-220252-22025100-22025200	1.81322	22.9246	2.12062e-05	0.0437272	5.22578	4.58625	2.44008	14.1305	14.4155	15.4539	Hyper
Chr1-225422-22542100-22542200	2.77721	22.2262	5.15535e-06	0.0135132	1.74193	1.05837	1.3556	8.4783	7.20774	14.9994	Hyper
Chr1-228907-22890600-22890700	1.09742	25.0362	8.99559e-06	0.0214026	28.2192	32.1038	35.5167	73.0076	62.9476	69.5426	Hyper
Chr1-240828-24082700-24082800	1.11413	24.0281	4.77292e-07	0.00175746	20.9031	21.1673	21.4185	38.6234	53.3373	45.9072	Hyper
Chr1-241014-24101300-24101400	2.38376	22.7405	2.73362e-09	1.6471e-05	4.18063	2.82231	4.88016	24.9639	16.8181	21.8173	Hyper
Chr1-247212-24721100-24721200	1.03256	24.5766	4.71084e-10	3.36246e-06	63.0578	59.2685	47.1749	110.218	102.83	134.085	Hyper
Chr1-247213-24721200-24721300	1.05884	25.8624	1.6987e-09	1.0946e-05	106.606	103.72	88.6563	195.001	211.908	216.355	Hyper
Chr1-248844-24884300-24884400	2.08571	29.9009	2.53508e-25	1.96025e-20	256.76	352.083	279.796	1065.44	1517.95	1189.95	Hyper
Chr1-252661-25266000-25266100	2.01505	23.3476	1.18641e-15	2.29347e-11	13.587	11.9948	14.3694	45.6886	61.0255	55.9068	Hyper
Chr1-265109-26510800-26510900	1.22891	22.1754	1.56708e-06	0.00491249	16.7225	10.5837	15.4538	39.0944	30.2725	31.3624	Hyper
Chr1-282124-28212300-28212400	2.91326	20.0802	1.65471e-06	0.00515237	1.04516	1.05837	1.89784	11.7754	6.72722	14.0903	Hyper
Chr1-39147-3914600-3914700	6.40397	20.2652	1.16048e-16	2.44731e-12	0	0	0.27112	17.8986	18.2596	18.1811	Hyper
Chr1-45835-4583400-4583500	1.51075	23.2274	4.5643e-14	6.831e-10	20.2064	18.6978	25.4853	73.4786	46.6101	64.0883	Hyper
Chr1-53097-5309600-5309700	4.06625	23.0095	7.14934e-09	4.09499e-05	1.04516	0.352789	0.54224	13.1885	12.4934	12.7268	Hyper
Chr1-558-55700-55800	1.43467	22.3199	2.61461e-11	2.47562e-07	17.4193	17.9922	19.7918	45.2176	52.3762	52.2706	Hyper
Chr1-69269-6926800-6926900	3.59398	25.8811	5.0677e-24	2.61241e-19	10.8	6.70299	12.7426	116.812	131.661	120.904	Hyper
Chr1-82675-8267400-8267500	2.20943	23.654	9.61494e-08	0.000420836	8.36125	5.29183	7.86248	29.6741	38.9218	32.2714	Hyper
Chr1-85913-8591200-8591300	1.43844	22.612	6.60045e-06	0.0164639	17.0709	13.7588	10.5737	40.5075	35.0777	37.2712	Hyper
Chr1-86229-8622800-8622900	1.41994	22.0841	5.86687e-06	0.0150043	19.1612	10.5837	14.9116	56.522	24.5063	39.0893	Hyper
Chr1-94324-9432300-9432400	1.70112	21.7731	8.11551e-11	6.60561e-07	9.7548	13.7588	11.387	35.3263	40.3633	38.6348	Hyper
Chr2-103185-10318400-10318500	1.78999	21.6422	3.84191e-06	0.0103032	5.92255	4.23347	5.4224	17.8986	18.2596	18.6356	Hyper
Chr2-106344-10634300-10634400	3.0031	20.6591	8.35372e-09	4.66954e-05	4.18063	0.705578	2.16896	26.3769	10.0908	22.7264	Hyper
Chr2-115447-11544600-11544700	2.44855	23.7416	1.98804e-11	1.94258e-07	4.8774	2.46952	7.59136	36.2683	19.2206	27.7262	Hyper
Chr2-12079-1207800-1207900	1.73871	23.1024	3.48171e-06	0.00944645	4.8774	4.93904	7.04912	22.1378	17.2986	17.7266	Hyper
Chr2-170686-17068500-17068600	2.01942	20.9872	1.54318e-05	0.0334561	3.13547	2.11673	4.0668	16.4856	11.5324	10.9086	Hyper
Chr2-183910-18390900-18391000	1.56497	23.8252	1.51257e-05	0.0331018	6.61933	7.76135	4.88016	16.9566	22.5843	18.1811	Hyper
Chr2-183935-18393400-18393500	1.39562	23.9832	1.23114e-12	1.46458e-08	26.1289	22.5785	27.3831	67.3554	63.9086	69.5426	Hyper
Chr2-183961-18396000-18396100	1.33836	24.5517	5.21495e-10	3.66588e-06	16.7225	20.4618	28.1965	40.9785	65.8307	59.0885	Hyper
Chr2-22845-2284400-2284500	1.35171	23.3659	1.13233e-06	0.00375246	12.8903	9.5253	11.9293	37.2103	27.3894	23.6354	Hyper
Chr2-24790-2478900-2479000	3.09431	20.1173	2.57195e-08	0.000129702	1.04516	2.46952	1.08448	12.7175	13.935	15.4539	Hyper
Chr2-25223-2522200-2522300	1.40441	23.391	9.44875e-11	7.44028e-07	17.4193	15.5227	21.4185	47.1017	44.688	52.7251	Hyper
Chr2-26047-2604600-2604700	1.7362	23.9411	4.90545e-07	0.00179204	5.57417	5.99741	7.59136	19.7827	24.0258	20.9082	Hyper
Chr2-26049-2604800-2604900	1.16854	24.771	5.95878e-12	6.34133e-08	64.7997	47.9793	72.9313	152.609	123.493	141.812	Hyper
Chr2-26062-2606100-2606200	1.02823	23.5301	2.94316e-06	0.00812786	33.0966	26.1064	41.7525	81.9569	46.6101	77.7241	Hyper
Chr2-26065-2606400-2606500	1.44871	24.256	4.5175e-15	8.3836e-11	22.9934	20.109	32.5344	69.7105	69.6748	67.7245	Hyper
Chr2-32541-3254000-3254100	1.42881	22.4986	5.63211e-06	0.0145168	8.70964	8.11414	9.21808	25.4349	22.5843	22.7264	Hyper
Chr2-32744-3274300-3274400	4.07744	22.9347	3.94855e-33	6.10645e-28	4.52901	5.29183	4.60904	68.2975	90.8175	90.4509	Hyper
Chr2-33105-3310400-3310500	1.66088	21.1819	2.4801e-05	0.0495967	4.18063	5.29183	5.69352	16.0146	17.2986	15.4539	Hyper
Chr2-34149-3414800-3414900	4.60497	21.8706	2.52134e-20	7.31111e-16	4.52901	2.11673	2.44008	75.8337	57.6619	96.3597	Hyper
Chr2-34262-3426100-3426200	1.40383	21.1114	2.08179e-05	0.0433116	6.61933	8.46693	9.4892	18.8407	24.9868	21.8173	Hyper
Chr2-34480-3447900-3448000	2.37927	20.0246	8.16394e-08	0.00036073	2.78708	3.88068	2.7112	18.8407	11.5324	19.9992	Hyper
Chr2-35022-3502100-3502200	4.64785	21.3549	4.50355e-11	3.94232e-07	0.696771	1.05837	0.54224	20.7247	24.9868	20.9082	Hyper
Chr2-4231-423000-423100	1.87924	23.6535	5.52939e-13	6.93342e-09	16.0257	15.5227	11.387	52.2829	56.2204	50.4525	Hyper
Chr2-44286-4428500-4428600	1.14786	22.462	9.4617e-11	7.44028e-07	38.6708	22.9313	29.281	66.4134	66.7917	68.6336	Hyper
Chr2-4450-444900-445000	2.21336	23.0256	1.13949e-05	0.0263004	2.4387	0.705578	4.33792	10.3624	12.9739	12.7268	Hyper
Chr2-49636-4963500-4963600	2.14734	22.4891	2.85875e-07	0.001124	3.83224	4.23347	3.52456	18.8407	19.7012	14.0903	Hyper
Chr2-49648-4964700-4964800	1.5263	23.2718	8.82685e-07	0.0030112	12.5419	7.05578	5.69352	22.6088	25.9479	24.999	Hyper
Chr2-55159-5515800-5515900	6.29017	20.1148	2.21111e-07	0.00090783	0	0	0	3.29712	12.4934	13.1813	Hyper
Chr2-64028-6402700-6402800	2.07505	23.5588	4.65216e-10	3.36246e-06	9.40641	3.1751	6.23576	28.261	24.5063	27.7262	Hyper
Chr2-66636-6663500-6663600	1.7309	20.552	1.30629e-06	0.00423814	5.92255	5.29183	7.04912	19.3117	23.5453	18.6356	Hyper
Chr2-67790-6778900-6779000	1.78887	22.4286	2.01784e-09	1.24824e-05	7.3161	8.11414	10.3026	31.0871	27.3894	31.3624	Hyper
Chr2-69693-6969200-6969300	1.61789	23.307	2.72789e-08	0.000136087	10.8	7.40857	13.556	22.6088	37.4803	38.1803	Hyper
Chr2-70807-7080600-7080700	2.43904	22.3391	2.05635e-08	0.000109661	3.83224	3.1751	2.7112	20.7247	16.8181	16.8175	Hyper
Chr2-78898-7889700-7889800	1.3074	23.9169	4.92893e-11	4.23478e-07	25.7805	21.1673	21.1474	52.2829	58.623	58.1795	Hyper
Chr2-79638-7963700-7963800	1.44511	22.6357	2.3573e-05	0.0473789	5.92255	8.46693	7.86248	23.0798	16.3375	21.8173	Hyper
Chr2-8084-808300-808400	2.11523	21.8985	4.984e-06	0.0131382	4.8774	3.1751	2.7112	10.8334	21.1427	15.9084	Hyper
Chr2-91971-9197000-9197100	1.36979	24.6106	5.4117e-22	2.28251e-17	57.1352	62.0908	62.8999	156.378	149.44	165.448	Hyper
Chr2-91972-9197100-9197200	1.67733	22.7423	1.82421e-06	0.00549575	6.61933	4.23347	8.1336	16.4856	26.4284	18.6356	Hyper
Chr2-94969-9496800-9496900	1.2266	25.1797	3.12592e-11	2.84368e-07	61.6642	66.3243	62.0865	140.834	158.57	145.903	Hyper
Chr2-98555-9855400-9855500	1.87639	21.5086	1.75875e-06	0.00540379	3.83224	3.88068	7.04912	15.0725	19.2206	20.9082	Hyper
Chr2-98968-9896700-9896800	1.24852	23.6886	2.24368e-08	0.000116961	29.2644	25.7536	27.9254	64.0583	82.1682	51.3616	Hyper
Chr3-110890-11088900-11089000	2.63539	22.5061	1.22509e-09	8.00537e-06	3.83224	0.705578	4.33792	21.1958	16.8181	19.0901	Hyper
Chr3-111411-11141000-11141100	2.59213	22.3834	5.04807e-07	0.00182973	2.78708	1.05837	2.98232	23.5508	7.68826	11.8177	Hyper
Chr3-114383-11438200-11438300	2.19405	22.5465	3.7043e-11	3.30503e-07	10.1032	2.82231	5.4224	28.261	29.3115	27.7262	Hyper
Chr3-117153-11715200-11715300	2.21503	22.4214	1.7379e-10	1.32668e-06	4.8774	4.93904	6.778	22.6088	31.7141	24.0899	Hyper
Chr3-117442-11744100-11744200	1.66567	21.237	2.21015e-05	0.0453718	4.18063	4.58625	7.04912	13.1885	18.2596	19.5447	Hyper
Chr3-121606-12160500-12160600	2.03196	21.2999	9.07316e-12	9.35445e-08	5.92255	9.17251	8.67584	32.9712	32.6751	32.7259	Hyper
Chr3-122424-12242300-12242400	1.75881	22.9714	6.85392e-06	0.0170047	1.39354	6.3502	7.32024	14.6015	16.8181	20.4537	Hyper
Chr3-122641-12264000-12264100	1.78211	21.4894	1.91289e-06	0.00571906	5.92255	6.70299	5.96464	24.0219	15.3765	25.4535	Hyper
Chr3-135891-13589000-13589100	2.5174	23.8028	1.77361e-07	0.000734704	8.36125	5.64462	5.69352	16.4856	31.7141	66.361	Hyper
Chr3-139359-13935800-13935900	1.06569	22.1405	1.32092e-05	0.0297495	14.9806	17.6394	19.7918	47.5727	30.2725	32.2714	Hyper
Chr3-141918-14191700-14191800	2.81185	21.7125	7.92309e-10	5.40578e-06	4.52901	1.05837	1.62672	18.3697	16.8181	17.7266	Hyper
Chr3-141944-14194300-14194400	2.61863	21.6771	9.57782e-07	0.00324353	1.74193	1.41116	2.7112	13.6595	12.0129	12.2722	Hyper
Chr3-141961-14196000-14196100	1.79291	22.4077	4.43739e-08	0.000207953	6.61933	6.70299	7.86248	24.0219	22.5843	27.7262	Hyper
Chr3-141962-14196100-14196200	2.13652	23.5931	4.83814e-20	1.32039e-15	12.1935	10.9365	15.4538	46.6307	71.1164	53.1797	Hyper
Chr3-141974-14197300-14197400	2.02869	21.1661	3.4459e-06	0.00940428	3.83224	1.41116	5.15128	15.5436	13.935	14.0903	Hyper
Chr3-141996-14199500-14199600	3.14626	22.6398	1.98999e-19	5.12921e-15	9.40641	11.2892	7.86248	85.7251	76.8826	93.178	Hyper
Chr3-142048-14204700-14204800	2.92008	21.0398	1.09823e-06	0.0036922	1.39354	0.705578	1.89784	10.8334	9.61032	12.2722	Hyper
Chr3-142161-14216000-14216100	2.8998	22.204	1.43401e-06	0.00455693	4.52901	0	0	9.42034	8.16877	18.6356	Hyper
Chr3-152255-15225400-15225500	2.008	22.2907	4.87612e-13	6.28411e-09	8.36125	10.2309	11.6582	40.9785	42.2854	39.5439	Hyper
Chr3-154081-15408000-15408100	1.60559	22.8289	3.81692e-06	0.0102957	9.40641	2.82231	7.86248	19.3117	14.4155	28.1807	Hyper
Chr3-156320-15631900-15632000	2.08845	22.4854	2.38973e-08	0.000121837	5.57417	3.52789	5.69352	17.8986	23.0648	23.1809	Hyper
Chr3-156329-15632800-15632900	2.23162	22.6669	2.84428e-07	0.001124	4.18063	2.82231	3.52456	12.2464	15.857	22.7264	Hyper
Chr3-156343-15634200-15634300	1.21286	23.9412	2.54307e-06	0.00715067	34.1418	21.5201	36.8723	81.0149	39.8828	94.0871	Hyper
Chr3-156364-15636300-15636400	1.88143	23.7052	1.47582e-07	0.000628172	7.66448	2.82231	6.50688	24.0219	17.7791	21.8173	Hyper
Chr3-156371-15637000-15637100	1.00342	24.5232	9.55714e-10	6.42615e-06	92.6706	90.6667	102.483	197.827	170.103	205.446	Hyper
Chr3-156389-15638800-15638900	1.67665	23.5704	7.41567e-06	0.0183006	6.27094	4.58625	6.778	20.2537	19.2206	17.7266	Hyper
Chr3-156396-15639500-15639600	1.36231	23.0952	7.33797e-07	0.00257913	15.6774	12.3476	16.8094	35.3263	35.0777	45.4527	Hyper
Chr3-156420-15641900-15642000	1.76378	22.9107	3.0189e-08	0.000147434	8.70964	6.70299	8.1336	24.9639	24.9868	30.9078	Hyper
Chr3-157819-15781800-15781900	1.24174	22.9	6.67194e-16	1.34585e-11	47.3804	39.8651	29.5521	81.9569	96.5837	98.1778	Hyper
Chr3-157970-15796900-15797000	2.41843	22.5204	3.47894e-08	0.000166398	3.13547	4.23347	2.16896	16.9566	20.6622	14.9994	Hyper
Chr3-1591-159000-159100	2.68449	21.0893	2.3483e-08	0.000121055	2.4387	1.05837	3.52456	13.1885	14.896	19.0901	Hyper
Chr3-160562-16056100-16056200	2.52442	22.7976	6.40396e-09	3.7139e-05	3.48386	0.705578	6.50688	24.4929	12.0129	26.8171	Hyper
Chr3-161598-16159700-16159800	1.09453	22.9265	1.73822e-05	0.0373355	18.8128	15.8755	16.2672	37.6814	28.831	42.7255	Hyper
Chr3-161605-16160400-16160500	2.11838	24.2169	4.36727e-37	1.0131e-31	39.3676	34.2205	38.7702	154.023	170.103	164.993	Hyper
Chr3-161607-16160600-16160700	1.5752	23.0348	6.64617e-07	0.00237192	11.1483	8.46693	4.60904	26.848	28.3504	17.7266	Hyper
Chr3-167706-16770500-16770600	1.16617	25.0247	1.89003e-09	1.18497e-05	26.1289	27.8703	22.503	50.3988	57.6619	64.0883	Hyper
Chr3-167877-16787600-16787700	2.25205	22.6346	1.2661e-12	1.46852e-08	4.8774	5.99741	10.3026	34.3842	36.9997	30.9078	Hyper
Chr3-171433-17143200-17143300	3.43586	24.3009	3.30158e-10	2.4706e-06	0	5.29183	5.96464	69.2395	31.7141	24.5445	Hyper
Chr3-172764-17276300-17276400	2.75614	20.9093	7.49257e-07	0.00261367	3.48386	0	5.15128	26.848	8.64929	24.999	Hyper
Chr3-173774-17377300-17377400	2.3237	23.2303	3.70952e-08	0.000175616	3.13547	2.46952	5.15128	19.3117	19.2206	16.8175	Hyper
Chr3-177757-17775600-17775700	1.23087	25.9572	3.97313e-14	6.14446e-10	120.193	136.529	125.8	289.204	295.037	314.078	Hyper
Chr3-182551-18255000-18255100	1.54117	21.7399	4.63719e-07	0.00172114	9.05802	9.5253	11.6582	30.1451	32.6751	25.908	Hyper
Chr3-207275-20727400-20727500	1.28095	23.0071	4.33727e-10	3.1941e-06	33.7934	30.6926	33.3478	81.0149	75.441	81.8149	Hyper
Chr3-220549-22054800-22054900	5.73484	22.5693	7.75663e-18	1.71367e-13	0.348386	0.705578	0	22.6088	24.0258	29.0897	Hyper
Chr3-231571-23157000-23157100	1.18921	23.4169	4.05397e-07	0.00155442	20.5547	11.9948	20.0629	41.9205	31.7141	46.8163	Hyper
Chr3-28086-2808500-2808600	2.6398	21.1936	1.94689e-05	0.0409163	0	1.41116	2.7112	11.3044	8.16877	8.18149	Hyper
Chr3-59550-5954900-5955000	1.36583	23.9706	1.49223e-05	0.0330406	8.36125	8.81972	10.0314	22.6088	24.0258	24.0899	Hyper
Chr3-87529-8752800-8752900	1.41413	23.1489	2.24347e-08	0.000116961	17.7677	9.87809	17.8939	37.2103	37.9608	46.8163	Hyper
Chr3-96925-9692400-9692500	1.96602	22.0148	1.92299e-06	0.00571906	5.57417	1.41116	5.69352	17.8986	16.8181	15.9084	Hyper
Chr3-97815-9781400-9781500	1.24771	23.4018	9.91231e-06	0.023242	11.1483	11.9948	14.3694	34.8553	28.831	25.908	Hyper
Chr4-109930-10992900-10993000	1.15503	23.6631	9.91895e-06	0.023242	19.5096	27.1647	25.2142	48.0437	54.7788	57.7249	Hyper
Chr4-145825-14582400-14582500	1.36113	24.4039	7.76425e-06	0.0188599	20.5547	17.9922	15.9961	39.0944	46.6101	54.9978	Hyper
Chr4-154422-15442100-15442200	2.7495	22.1266	6.39168e-10	4.42601e-06	1.04516	2.11673	5.15128	14.1305	22.1037	21.8173	Hyper
Chr4-168418-16841700-16841800	5.59354	19.5392	7.93314e-06	0.0191697	0	0	0	4.23915	5.76619	7.72696	Hyper
Chr4-17135-1713400-1713500	6.85956	22.4239	1.73553e-05	0.0373355	0	0	0	9.42034	10.5714	23.1809	Hyper
Chr4-17304-1730300-1730400	2.08784	20.3397	3.14105e-06	0.00862303	4.8774	3.88068	1.62672	12.7175	15.3765	17.272	Hyper
Chr4-183952-18395100-18395200	4.26323	21.2207	1.55756e-08	8.50155e-05	0.696771	0	0.54224	9.89136	13.4544	7.27243	Hyper
Chr4-20738-2073700-2073800	1.22408	25.7898	3.45537e-18	8.01562e-14	78.0384	76.908	76.1847	167.682	194.128	178.629	Hyper
Chr4-20752-2075100-2075200	1.18435	23.0609	2.11624e-06	0.00616178	27.1741	23.9896	23.5874	45.2176	61.5061	63.6338	Hyper
Chr4-33238-3323700-3323800	2.11311	22.7962	1.7408e-07	0.00072761	4.8774	2.82231	4.60904	16.4856	22.1037	15.9084	Hyper
Chr4-42202-4220100-4220200	1.85445	22.3211	3.25974e-08	0.000157538	4.8774	7.05578	7.32024	22.1378	22.1037	26.3626	Hyper
Chr4-43815-4381400-4381500	2.91921	20.8041	5.05548e-11	4.26454e-07	3.13547	0.705578	5.4224	23.0798	23.5453	25.908	Hyper
Chr4-55601-5560000-5560100	1.95783	21.3366	1.49553e-05	0.0330406	3.13547	4.93904	2.16896	11.3044	17.2986	12.2722	Hyper
Chr4-55603-5560200-5560300	1.3354	23.1076	6.59725e-07	0.00237192	14.2838	12.3476	14.6405	32.5002	32.6751	39.5439	Hyper
Chr4-55610-5560900-5561000	1.43608	25.567	4.35914e-25	2.88918e-20	77.69	69.8522	71.8468	190.762	224.882	178.629	Hyper
Chr4-66474-6647300-6647400	2.14763	23.7806	9.82195e-15	1.68774e-10	13.587	7.76135	11.1159	41.4495	51.4152	52.2706	Hyper
Chr4-70136-7013500-7013600	2.07999	22.1205	1.54318e-05	0.0334561	1.74193	2.82231	4.33792	11.3044	13.4544	14.0903	Hyper
Chr4-75248-7524700-7524800	1.91221	22.1084	1.81466e-06	0.00549575	3.13547	4.58625	5.96464	16.4856	19.7012	16.363	Hyper
Chr4-75616-7561500-7561600	1.91805	21.2858	1.33479e-05	0.0299168	2.78708	1.76394	7.04912	15.5436	12.9739	16.363	Hyper
Chr4-76119-7611800-7611900	1.29766	22.8809	9.26603e-09	5.11784e-05	17.7677	16.5811	19.7918	44.7466	38.4413	50.4525	Hyper
Chr4-78457-7845600-7845700	2.35627	22.0602	4.9452e-21	1.63881e-16	10.8	16.9339	11.6582	58.8771	72.5579	71.8153	Hyper
Chr4-78830-7882900-7883000	1.27215	24.8428	2.67741e-14	4.28341e-10	238.296	181.333	188.7	492.684	434.386	542.705	Hyper
Chr4-78856-7885500-7885600	3.30452	22.7359	7.17461e-28	6.65734e-23	10.4516	3.88068	5.4224	67.3554	63.4281	67.7245	Hyper
Chr4-78857-7885600-7885700	1.84576	21.7112	5.68849e-15	1.01507e-10	14.2838	15.1699	10.5737	51.8119	39.4023	53.6342	Hyper
Chr4-79448-7944700-7944800	1.19345	24.3224	1.29386e-05	0.0292824	13.2387	9.5253	15.4538	28.732	26.4284	32.7259	Hyper
Chr5-101279-10127800-10127900	1.97706	24.5621	1.63896e-14	2.71571e-10	19.1612	19.7562	21.6896	73.0076	73.519	93.178	Hyper
Chr5-102842-10284100-10284200	1.16729	22.0756	2.6042e-06	0.00727845	19.5096	14.4643	12.2004	32.0292	31.2335	40.9074	Hyper
Chr5-107624-10762300-10762400	2.00549	22.8227	1.19633e-06	0.00393646	3.48386	4.58625	4.60904	17.8986	17.7791	16.363	Hyper
Chr5-107941-10794000-10794100	1.75338	22.2463	5.32854e-09	3.12935e-05	10.1032	8.46693	6.778	26.3769	33.1556	26.8171	Hyper
Chr5-112781-11278000-11278100	2.22646	20.7934	2.25057e-06	0.00640586	3.83224	1.05837	3.52456	11.7754	14.896	14.0903	Hyper
Chr5-117687-11768600-11768700	2.1761	22.5787	2.38184e-09	1.45402e-05	7.66448	3.88068	5.69352	32.5002	23.5453	23.1809	Hyper
Chr5-123740-12373900-12374000	1.60483	21.9417	2.65138e-12	2.92883e-08	16.3741	16.5811	12.4715	44.2756	44.2075	50.4525	Hyper
Chr5-130197-13019600-13019700	3.77612	20.3737	1.56195e-06	0.00491249	0.348386	0	1.08448	7.53627	9.1298	7.72696	Hyper
Chr5-141440-14143900-14144000	2.41331	21.5144	5.37242e-06	0.014003	4.8774	1.76394	0	8.94932	14.4155	13.6358	Hyper
Chr5-141519-14151800-14151900	1.00158	22.3541	1.47377e-07	0.000628172	28.916	28.2231	26.5698	62.1742	48.5321	57.2704	Hyper
Chr5-142469-14246800-14246900	1.246	23.6386	1.49354e-05	0.0330406	12.1935	11.9948	12.7426	30.6161	29.3115	28.1807	Hyper
Chr5-142536-14253500-14253600	2.40347	23.9045	3.34599e-13	4.43536e-09	9.05802	8.46693	11.1159	52.7539	40.8439	59.543	Hyper
Chr5-142889-14288800-14288900	1.92712	23.552	1.13142e-12	1.38138e-08	13.2387	8.46693	12.4715	35.3263	46.6101	49.0889	Hyper
Chr5-146037-14603600-14603700	2.39507	22.6218	1.7901e-11	1.80548e-07	5.57417	4.58625	5.15128	24.0219	24.0258	34.0895	Hyper
Chr5-15163-1516200-1516300	1.45059	23.5319	5.53344e-06	0.0143422	9.05802	8.11414	7.32024	24.0219	24.0258	19.5447	Hyper
Chr5-152593-15259200-15259300	2.00811	21.1486	4.58218e-07	0.00172114	3.83224	4.93904	4.33792	18.8407	17.2986	17.7266	Hyper
Chr5-158411-15841000-15841100	2.57626	22.6188	9.36541e-06	0.0221688	2.4387	0.705578	1.89784	8.4783	13.4544	9.9996	Hyper
Chr5-158889-15888800-15888900	3.8728	21.8918	1.10323e-05	0.0255922	0	0	1.08448	6.12322	6.24671	8.63601	Hyper
Chr5-160100-16009900-16010000	1.31193	22.3883	4.0181e-06	0.0107138	12.1935	8.11414	13.0138	26.3769	26.9089	29.9988	Hyper
Chr5-162595-16259400-16259500	1.44438	21.0664	7.56145e-06	0.0185616	9.40641	7.76135	7.04912	25.4349	20.6622	20.4537	Hyper
Chr5-166500-16649900-16650000	1.82398	22.3995	6.01396e-12	6.34133e-08	8.01287	9.5253	14.3694	39.0944	38.9218	35.9076	Hyper
Chr5-167539-16753800-16753900	1.41513	24.0239	4.63679e-07	0.00172114	13.2387	10.9365	16.2672	31.5581	35.5582	41.362	Hyper
Chr5-177425-17742400-17742500	1.68863	22.8871	6.7989e-07	0.00240791	5.57417	4.23347	13.556	16.4856	27.3894	32.2714	Hyper
Chr5-181327-18132600-18132700	1.23862	23.8855	2.31659e-05	0.0471397	25.7805	25.048	24.1297	30.6161	58.1424	88.6328	Hyper
Chr5-185007-18500600-18500700	1.43925	22.1625	9.95111e-08	0.000431479	13.2387	9.87809	12.2004	28.261	33.1556	34.9986	Hyper
Chr5-198122-19812100-19812200	1.28954	23.4203	2.61882e-07	0.00105652	19.1612	14.8171	19.7918	47.1017	39.8828	44.9982	Hyper
Chr5-199526-19952500-19952600	1.44581	24.8596	1.81005e-21	6.99812e-17	43.5482	37.0428	42.2947	99.8556	119.648	115.904	Hyper
Chr5-202953-20295200-20295300	2.81437	21.0746	6.47563e-06	0.0162399	4.18063	2.11673	4.60904	8.00729	43.2464	27.7262	Hyper
Chr5-223228-22322700-22322800	2.04929	23.8901	1.65289e-08	8.91697e-05	5.92255	6.70299	5.96464	20.2537	27.8699	29.9988	Hyper
Chr5-223229-22322800-22322900	1.92382	23.296	2.62707e-13	3.5848e-09	10.8	10.9365	11.6582	35.7973	44.688	47.2708	Hyper
Chr5-262100-26209900-26210000	4.76056	21.9048	1.88804e-05	0.0400991	0	0.352789	0	10.8334	6.24671	2.27264	Hyper
Chr5-3176-317500-317600	1.80585	23.0315	2.67451e-06	0.00743019	4.52901	4.93904	5.69352	17.4276	19.7012	16.8175	Hyper
Chr5-59776-5977500-5977600	7.65796	22.102	1.89281e-05	0.0400991	0	0	0	0	40.3633	34.9986	Hyper
Chr5-59845-5984400-5984500	6.90679	20.6092	5.8612e-14	8.24034e-10	0	0	0	17.4276	15.3765	11.8177	Hyper
Chr5-86118-8611700-8611800	1.65426	23.3169	2.74294e-11	2.54518e-07	13.9354	8.46693	16.2672	40.9785	36.9997	44.5437	Hyper
Chr5-86674-8667300-8667400	1.06703	23.6929	3.05256e-07	0.00119012	42.503	36.3372	39.3124	90.9063	71.5969	85.4511	Hyper
Chr5-90498-9049700-9049800	1.33026	22.2522	1.76376e-05	0.0377096	10.1032	11.2892	10.8448	23.5508	31.7141	26.3626	Hyper
Chr5-92903-9290200-9290300	2.42942	24.271	9.08731e-48	4.21606e-42	19.858	21.1673	23.5874	112.573	123.493	113.632	Hyper
Chr5-93029-9302800-9302900	1.01687	23.8431	4.39922e-09	2.61669e-05	35.5353	29.6343	35.5167	68.2975	65.8307	69.9972	Hyper
Chr2-157223-15722200-15722300	-2.72079	27.2861	1.42025e-20	4.39283e-16	121.587	139.352	112.244	11.3044	24.9868	19.9992	Hypo
Chr2-96873-9687200-9687300	-2.49525	21.4474	4.11974e-07	0.00156669	14.9806	15.8755	13.2849	1.88407	3.36361	2.27264	Hypo
Chr3-141977-14197600-14197700	-1.56941	23.6145	2.87319e-28	3.33254e-23	131.69	117.831	112.244	36.7393	40.3633	44.5437	Hypo
Chr5-136565-13656400-13656500	-3.47567	22.6045	5.9079e-06	0.0150043	55.0449	46.5681	2.16896	1.88407	5.28568	1.81811	Hypo
Chr5-172302-17230100-17230200	-1.36622	23.5501	1.82387e-12	2.06387e-08	185.69	170.044	214.185	62.1742	76.402	82.2694	Hypo
Chr5-172320-17231900-17232000	-7.90002	22.1409	2.35898e-05	0.0473789	72.8126	9.87809	6.50688	0	0	0	Hypo
