# Supplementary material for: Biogenesis of phased siRNAs on membrane-bound polysomes in Arabidopsis
Source: eLife. 2016 Dec 12;5:e22750. doi: 10.7554/eLife.22750 (PMC5207768; doi:10.7554/eLife.22750)
Supplement: Supplementary file 2. — DOI: http://dx.doi.org/10.7554/eLife.22750.016 [file elife-22750-supp2.xlsx]

## Sheet: miR exp (RPMR) 
Supplementary File 2. A list of 178 miRNAs in 12 sRNA-seq libraries
Notes: Only miRNAs at levels > 1RPMR (reads per million 45S rRNA fragments) in any of the 12 libraries were included.
M, microsome; MBP, membrane-bound polysome; T, total extract; TP, total polysome. The numbers after the underscore indicate biological replicates.
The length of miRNAs is the annotated length.
miRNA ID	length(nt)	M_1	M_2	M_3	MBP_1	MBP_2	MBP_3	T_1	T_2	T_3	TP_1	TP_2	TP_3
ath-miR5027	21	2.08469	2.91857	1.37268	0.471015	0.480564	0.45453	0.473582	1.10678	2.58493	0	0	0
ath-miR156f-3p	21	0.347448	1.25081	2.74536	0	0	0	4.26224	1.66018	2.06795	0.348436	0	0.271201
ath-miR393a-5p	22	1.73724	0	0.343171	2.82609	1.92226	2.27265	1.89433	1.10678	0.516987	0.348436	0.352791	0
ath-miR842	21	1.38979	1.66775	2.74536	2.35508	0	0.90906	0.947165	2.21357	0.516987	0	0.352791	0.271201
ath-miR5656	21	0.694895	0	0	0.94203	8.16959	1.36359	0.947165	0.553392	1.03397	0	0	0
ath-miR8183	21	3.12703	2.08469	0.686341	0.94203	1.44169	1.36359	2.36791	1.10678	0.516987	0.348436	0	0
ath-miR838	21	2.08469	2.08469	0.343171	0.471015	1.44169	0.90906	1.42075	2.76696	0.516987	0.348436	0.705583	1.0848
ath-miR5023	21	2.08469	0.833876	0.343171	1.41305	3.84451	2.72718	0	0.553392	0	1.04531	0.705583	0.813603
ath-miR829-5p	21	1.38979	2.08469	1.02951	0	0.480564	1.36359	4.73582	3.32035	0.516987	0	0.352791	0
ath-miR5020b	21	7.2964	2.50163	1.37268	0.94203	0.961129	0.45453	0.947165	0.553392	0	0.348436	0	0
ath-miR1888a	21	1.04234	0.833876	0.686341	1.41305	1.44169	0.45453	3.78866	2.76696	2.58493	0	0	0.542402
ath-miR5663-3p	21	2.43213	0.416938	0	1.41305	0.961129	1.81812	2.84149	2.21357	3.10192	0	0	0.542402
ath-miR5638b	21	1.38979	1.25081	1.71585	3.76812	4.32508	1.81812	0.473582	0	0.516987	0	0.705583	0.271201
ath-miR399f	21	0.694895	0	1.37268	3.29711	2.88339	3.63624	0.473582	1.66018	1.03397	0.348436	0.352791	1.0848
ath-miR5996	22	2.77958	1.25081	1.02951	0.94203	2.88339	1.36359	0.473582	4.42714	2.06795	0.696872	0	0.271201
ath-miR5663-5p	21	2.77958	0	1.02951	0	0.480564	0	4.26224	4.42714	5.68685	0.696872	0.352791	0
ath-miR5653	24	3.47448	0	0	0	0	0	4.73582	0	4.13589	3.8328	1.41117	2.71201
ath-miR830-5p	22	3.82192	2.50163	2.40219	0.94203	1.92226	2.72718	1.89433	1.66018	1.55096	0.348436	0.705583	0
ath-miR845a	21	2.08469	2.91857	1.71585	1.41305	1.92226	3.18171	1.89433	3.87375	1.03397	0	0.352791	0.271201
ath-miR390b-3p	20	1.38979	0	1.37268	0	0	0	5.20941	8.30089	6.20384	0	0	0
ath-miR852	21	1.38979	1.25081	0.343171	0	0.961129	0.90906	6.63015	7.1941	3.61891	0	0.352791	0
ath-miR5634	21	4.16937	3.75244	3.77488	0	0	0.45453	3.31508	4.42714	4.13589	0	0	0
ath-miR5024-3p	21	3.47448	2.08469	1.02951	2.82609	4.32508	4.99983	2.36791	1.10678	1.03397	0	1.05837	0
ath-miR156a-3p	22	0.694895	2.50163	2.74536	1.41305	2.88339	1.81812	4.26224	4.42714	3.61891	0	0	0.271201
ath-miR160a-5p	21	2.08469	1.66775	2.05902	1.88406	0.961129	3.63624	1.42075	3.87375	4.65288	1.74218	0.705583	0
ath-miR862-5p	21	0.694895	0.833876	1.02951	5.18117	5.76677	4.09077	1.42075	1.10678	3.10192	0	1.05837	0.542402
ath-miR777	22	1.73724	2.50163	1.37268	0.471015	0	0	6.63015	6.08732	8.27179	0.348436	0	0
ath-miR169m	21	10.7709	1.25081	0.343171	0	0	0	8.0509	5.53392	1.55096	0	0.352791	0.813603
ath-miR156e	20	0	8.33876	6.17707	0	0	6.81795	2.36791	3.87375	2.58493	0	0	0
ath-miR158a-5p	21	3.47448	6.25407	6.52024	1.41305	2.88339	1.36359	1.42075	4.98053	2.06795	0.348436	0.352791	0
ath-miR172a	21	2.08469	2.08469	3.43171	0	2.40282	2.72718	6.63015	3.32035	5.68685	0	2.46954	0.813603
ath-miR3434-5p	20	0.347448	0	0	2.82609	5.76677	3.18171	1.42075	1.10678	1.55096	5.92341	5.29187	4.33921
ath-miR398a-3p	21	3.47448	0.833876	0.686341	8.00726	8.65016	6.81795	0.947165	0.553392	1.55096	1.04531	0	0.813603
ath-miR5012	21	1.73724	2.08469	0.686341	5.18117	10.0919	2.72718	2.36791	2.21357	4.65288	1.04531	2.11675	1.62721
ath-miR164b-3p	21	1.73724	1.25081	2.74536	0.471015	3.36395	0.45453	9.94523	8.85428	8.27179	0	0	0
ath-miR169j	21	8.68619	0	1.37268	3.76812	3.84451	7.27248	5.20941	3.32035	0	0.348436	3.17512	1.62721
ath-miR157b-3p	21	0	0	0	0	0	0	0	0	38.774	0	0	0
ath-miR171c-5p	21	3.47448	2.50163	3.08853	2.35508	2.88339	3.63624	5.20941	9.96106	6.20384	0.696872	0	0.542402
ath-miR5642b	20	1.73724	0	1.02951	1.41305	4.80564	0	3.78866	7.74749	0.516987	6.96872	11.9949	2.71201
ath-miR863-3p	21	4.16937	4.16938	3.77488	6.59421	5.28621	6.81795	3.31508	3.87375	4.13589	1.74218	1.41117	0.542402
ath-miR395e	21	3.82192	4.16938	3.43171	11.7754	10.5724	0	1.89433	1.66018	3.61891	0	0	5.42402
ath-miR841b-5p	21	8.68619	8.33876	6.52024	1.88406	0.961129	1.81812	3.78866	6.64071	7.23781	0	0	0.542402
ath-miR4228-3p	21	3.12703	3.33551	3.43171	1.88406	1.44169	4.09077	13.7339	8.85428	6.72083	0	0.352791	0
ath-miR390a-3p	21	3.12703	0.833876	2.05902	0	0.480564	0	15.1546	11.6212	13.9586	0	0	0
ath-miR157a-5p	21	8.33874	2.50163	2.05902	8.94929	4.80564	5.90889	5.68299	2.76696	0	3.13592	3.17512	0.271201
ath-miR395d	21	4.51682	2.50163	0	12.2464	15.3781	0	3.78866	1.66018	0	0	8.81979	0
ath-miR169f-3p	21	3.12703	1.66775	1.02951	0.94203	0.480564	0.90906	14.2075	12.1746	15.5096	0	0	0.271201
ath-miR156b-3p	23	3.47448	5.4202	7.54975	3.76812	2.40282	4.09077	8.99807	7.74749	6.72083	0.348436	0	0
ath-miR172b-3p	21	9.03364	5.83713	4.11805	4.23914	1.44169	8.18154	3.78866	6.64071	3.61891	1.74218	1.05837	1.62721
ath-miR863-5p	21	8.33874	8.33876	5.8339	5.18117	6.24734	3.18171	3.78866	6.08732	3.10192	0.348436	0.352791	1.62721
ath-miR857	21	3.47448	2.50163	2.05902	3.29711	12.4947	7.27248	4.73582	6.08732	7.23781	0	2.46954	0.813603
ath-miR166e-5p	21	1.04234	1.25081	2.05902	3.76812	4.80564	4.5453	11.366	8.30089	9.30576	3.8328	1.76396	1.0848
ath-miR840-5p	22	6.94895	7.50489	7.89292	1.88406	2.40282	1.36359	10.8924	11.0678	7.7548	0.348436	1.05837	0.813603
ath-miR3932b-5p	21	8.33874	7.92183	3.08853	2.82609	1.92226	0.90906	14.6811	9.40767	11.3737	0	0.705583	0.271201
ath-miR447b	22	10.4234	10.4235	0	13.6594	0	14.545	4.26224	6.64071	0	0	1.05837	1.0848
ath-miR396b-3p	21	4.86427	2.50163	3.43171	0.94203	5.28621	3.18171	10.8924	11.6212	13.9586	1.74218	2.82233	1.62721
ath-miR840-3p	21	8.68619	9.58958	6.52024	7.53624	7.20846	7.27248	3.31508	6.08732	1.55096	2.09062	2.11675	1.62721
ath-miR156c-3p	22	3.47448	3.33551	4.46122	5.65218	3.84451	6.36342	13.7339	9.96106	10.8567	1.04531	0.705583	0.813603
ath-miR860	21	4.16937	7.08795	3.43171	1.41305	1.92226	0.90906	13.7339	16.6018	14.4756	0.696872	0.352791	0.542402
ath-miR164a	21	10.7709	8.33876	2.40219	16.4855	20.1837	0	1.89433	3.32035	2.06795	0	0	0
ath-miR391-5p	21	7.64385	2.91857	3.43171	8.47827	4.32508	9.99965	11.8396	4.42714	5.68685	1.74218	2.82233	2.44081
ath-miR403-5p	22	7.2964	4.16938	5.14756	0.471015	6.24734	4.09077	14.2075	13.8348	7.23781	1.04531	2.11675	0.813603
ath-miR169n	21	33.7024	12.9251	11.6678	0	7.68903	0.90906	0	0	1.55096	0.696872	0.352791	0
ath-miR848	22	11.8132	8.33876	6.17707	8.00726	8.16959	10.4542	3.31508	8.30089	4.65288	1.39374	2.11675	1.0848
ath-miR391-3p	21	3.82192	3.75244	8.92243	7.06523	2.40282	2.27265	10.8924	19.9221	13.4417	0.348436	0.705583	1.0848
ath-miR847	21	4.16937	5.00326	7.54975	14.1305	11.053	16.3631	4.73582	6.08732	4.65288	0.696872	0.705583	0.542402
ath-miR167a-3p	21	3.12703	2.50163	4.80439	0.94203	0.961129	0.45453	20.364	22.6891	21.7134	0.696872	0	0
ath-miR160b	21	12.5081	9.58958	6.17707	1.41305	1.44169	3.18171	16.1018	15.495	12.9247	0.348436	1.05837	1.0848
ath-miR833a-5p	22	5.55916	10.4235	8.92243	7.06523	15.3781	8.18154	12.7867	5.53392	8.78877	1.39374	1.76396	0.271201
ath-miR395a	21	6.94895	2.50163	3.77488	21.6667	13.4558	30.4535	1.42075	2.21357	3.10192	5.22654	0	0
ath-miR169a-5p	21	10.076	9.17264	5.14756	2.35508	9.13072	5.90889	18.9433	17.7086	10.3397	0.348436	2.11675	0.542402
ath-miR169a-3p	20	5.55916	5.00326	8.23609	0	0	0	30.7829	24.3493	20.6795	0	0	0
ath-miR5652	21	15.9826	10.8404	7.89292	14.6015	8.16959	8.63607	8.52448	3.87375	11.3737	2.09062	1.41117	2.71201
ath-miR168b-3p	21	5.90661	4.58632	9.95195	0.94203	0.480564	0	21.7848	32.6502	18.6115	0.696872	0.352791	0.542402
ath-miR156g	20	2.77958	4.58632	2.05902	24.0218	16.8198	26.8173	4.26224	3.87375	1.55096	4.18123	3.52791	4.06801
ath-miR395c	21	8.33874	6.67101	5.14756	27.7899	0	31.8171	0	0	5.16987	3.8328	5.29187	5.15282
ath-miR398a-5p	21	13.5505	20.8469	13.7268	7.06523	8.65016	12.2723	7.10374	3.32035	5.16987	4.18123	3.17512	2.98321
ath-miR781a	21	12.5081	9.58958	9.2656	1.88406	1.92226	3.18171	20.8376	19.9221	22.2304	0.348436	0.352791	1.356
ath-miR447a-3p	22	10.7709	13.759	11.6678	11.7754	26.9116	13.6359	3.78866	3.32035	4.13589	2.43905	1.05837	0.813603
ath-miR1886.1	21	11.8132	7.08795	3.77488	22.1377	17.3003	23.181	0	0	1.03397	7.66559	4.2335	8.13603
ath-miR781b	21	11.1183	13.342	10.6383	0.471015	4.32508	2.27265	21.7848	21.5823	23.2644	0.348436	0	0.271201
ath-miR160c-3p	21	5.90661	9.17264	3.77488	0.471015	0.480564	0.45453	30.3093	31.5434	25.8493	0.348436	0.705583	0.542402
ath-miR393a-3p	21	5.90661	5.00326	8.23609	5.65218	4.32508	2.27265	31.2564	26.5628	20.6795	1.74218	2.82233	0.813603
ath-miR156f-5p	20	12.1607	22.5147	24.7083	0	0	6.36342	17.9961	17.1552	11.3737	8.36246	0	4.06801
ath-miR171c-3p	21	12.1607	12.5081	4.46122	32.9711	33.6395	24.0901	3.31508	4.98053	5.16987	5.57498	1.76396	6.50882
ath-miR171b-5p	21	10.076	12.5081	12.3541	8.47827	5.28621	8.63607	34.5715	26.5628	24.8154	1.74218	3.88071	1.62721
ath-miR171a-5p	21	11.1183	14.1759	21.9629	14.6015	10.0919	15.454	22.732	18.8153	20.6795	1.04531	0.352791	2.16961
ath-miR8175	20	9.03364	5.00326	8.92243	3.29711	4.32508	2.27265	33.1508	42.6112	34.6381	6.62028	5.64466	4.88162
ath-miR395f	21	11.1183	7.50489	8.57926	37.2102	0	39.0896	15.1546	15.495	5.68685	8.7109	8.81979	4.88162
ath-miR158b	20	6.6015	10.0065	8.92243	14.1305	21.6254	26.8173	13.7339	24.9027	23.2644	5.57498	5.29187	7.05122
ath-miR861-3p	21	4.86427	6.67101	11.3246	0.471015	0	0.45453	53.5148	47.0384	47.5628	0.696872	0	0.271201
ath-miR5640	21	17.7198	15.8437	11.3246	15.5435	24.5088	27.2718	19.4169	13.2814	19.1285	6.62028	8.81979	8.94963
ath-miR400	21	35.7871	25.8502	19.2176	5.18117	0	18.6357	26.5206	27.1162	25.8493	2.43905	3.88071	1.356
ath-miR170-3p	21	34.7448	31.2704	13.7268	16.4855	26.9116	18.6357	13.7339	12.1746	10.8567	4.8781	8.1142	2.98321
ath-miR173-5p	22	18.4147	20.8469	12.3541	20.2537	19.2226	18.6357	31.2564	22.1357	25.8493	7.31715	3.88071	7.86482
ath-miR869.2	21	35.4397	37.9414	30.8853	9.4203	12.0141	17.2721	24.6263	24.9027	14.4756	2.43905	1.41117	1.62721
ath-miR171b-3p	21	28.8381	24.5994	15.0995	28.7319	26.431	38.1805	16.1018	8.30089	12.4077	5.57498	6.35025	3.25441
ath-miR169h	21	12.8556	19.1792	6.86341	8.47827	14.4169	8.18154	50.1997	47.0384	48.0798	1.04531	1.41117	1.62721
ath-miR170-5p	21	9.72853	17.9283	14.7563	33.9131	30.7561	26.3627	19.8905	21.5823	31.5362	4.18123	4.93908	4.61041
ath-miR858a	21	21.5417	26.2671	19.5607	9.4203	15.3781	12.7268	43.5696	35.4171	26.8833	2.43905	4.93908	2.44081
ath-miR472-5p	21	41.3463	37.5244	30.199	8.47827	9.61129	12.2723	30.3093	30.99	25.8493	1.39374	1.05837	0.813603
ath-miR399b	21	21.5417	54.6189	23.3356	0	19.7031	0	43.5696	19.3687	36.1891	0	13.7589	0
ath-miR394a	20	0	71.2964	9.60878	23.0797	75.9292	20.9084	8.99807	0	14.4756	4.8781	0	4.61041
ath-miR827	21	11.8132	5.00326	8.23609	52.2827	30.7561	56.8162	23.6791	22.1357	31.0192	1.74218	1.41117	4.88162
ath-miR472-3p	22	49.3376	47.9479	34.6602	30.145	24.0282	34.5443	9.47165	11.0678	7.7548	1.04531	1.41117	2.16961
ath-miR159c	21	38.5667	22.0977	19.5607	32.029	46.6147	33.6352	19.8905	18.8153	16.5436	2.09062	5.29187	3.52561
ath-miR395b	21	8.68619	5.4202	8.23609	32.5	159.067	37.2714	0	0	4.13589	7.31715	8.1142	4.88162
ath-miR393b-5p	22	30.5754	22.9316	19.5607	24.0218	29.3144	26.3627	41.2017	33.2035	31.0192	6.62028	6.35025	8.67843
ath-miR5026	21	14.9402	13.342	16.8154	1.88406	2.40282	5.90889	90.9278	83.0089	62.0384	1.74218	3.88071	1.356
ath-miR157a-3p	21	21.1943	42.1108	40.8373	0.94203	0	0	76.2468	80.7953	37.223	0.696872	0	0
ath-miR166b-3p	21	0	12.5081	53.8778	48.0435	10.0919	63.6342	31.73	11.0678	37.74	23.6936	0	14.1024
ath-miR824-5p	21	39.9565	37.1075	25.7378	37.2102	45.173	34.5443	28.8885	30.99	26.3663	5.57498	7.40862	4.61041
ath-miR843	21	31.2703	26.2671	26.7673	24.0218	54.3038	35.4533	42.6224	40.3976	35.6721	4.18123	5.99745	3.25441
ath-miR164b-5p	21	47.2529	60.456	29.1695	50.3986	20.6643	71.3612	11.8396	8.85428	5.68685	7.31715	10.9365	7.05122
ath-miR1886.2	21	51.4222	48.3648	34.6602	44.2754	41.8091	39.5441	26.5206	28.223	23.7814	2.43905	3.52791	6.23762
ath-miR398c-5p	21	34.3973	20.43	40.151	3.76812	6.7279	5.90889	101.82	89.6496	61.5214	2.43905	8.1142	3.79681
ath-miR823	21	42.3886	27.101	18.5312	77.7175	74.4875	78.6336	11.8396	14.3882	11.3737	13.2406	12.7005	11.3904
ath-miR5651	21	35.7871	44.6124	38.7783	52.2827	49.0176	43.6349	33.6243	26.0094	37.223	11.4984	5.99745	16.0009
ath-miR394b-5p	20	72.964	0	27.4536	27.3189	51.4204	55.9072	59.6714	49.2519	37.223	3.13592	20.8147	4.61041
ath-miR160c-5p	21	53.5069	45.0293	44.6122	36.2682	37.484	37.726	48.779	42.6112	44.4609	9.75621	7.05583	5.96642
ath-miR825	21	58.3712	49.6156	22.3061	44.7464	42.2897	42.7258	52.5676	45.9316	49.6307	6.27185	10.9365	9.22083
ath-miR396a-3p	21	40.6514	35.8567	36.7192	16.9565	46.6147	16.8176	81.9298	85.2224	51.6987	6.27185	12.3477	3.79681
ath-miR850	22	40.9988	40.443	40.151	42.3914	35.5618	34.5443	72.4581	78.5817	57.3855	3.48436	2.46954	4.06801
ath-miR157c-3p	21	31.2703	49.6156	76.1839	2.35508	1.44169	0.45453	93.7693	116.766	96.1595	1.39374	2.11675	0.813603
ath-miR166c	21	54.8967	60.873	70.35	81.4856	28.8339	131.814	22.732	39.2909	29.4682	13.2406	6.70304	5.42402
ath-miR399a	21	22.2366	20.8469	19.9039	102.681	172.523	103.633	24.6263	25.4561	20.1625	17.4218	19.4035	14.6448
ath-miR824-3p	21	22.5841	33.3551	54.9073	5.65218	2.40282	3.18171	136.865	173.212	149.926	2.09062	0.352791	1.89841
ath-miR397a	21	55.2442	35.8567	23.6788	95.1451	179.731	96.3603	25.0999	26.0094	18.6115	23.3452	27.8705	22.5097
ath-miR156a-5p	20	38.9141	96.7297	77.8997	63.587	60.0705	102.269	48.779	76.9215	51.6987	0	4.93908	18.4417
ath-miR822-5p	21	78.5232	67.127	42.8963	43.8044	83.1376	51.3619	102.767	89.0962	61.5214	18.1187	34.9264	13.0176
ath-miR166f	21	99.37	60.873	53.1914	133.297	125.908	95.4512	18.9433	48.1451	47.0458	25.0874	0	20.0689
ath-miR841a-5p	21	80.6078	78.3844	80.9882	60.761	61.0317	66.3613	90.9278	125.62	117.873	8.01403	3.52791	4.33921
ath-miR165a-5p	21	53.5069	61.2899	74.1248	78.1885	65.8373	60.907	139.233	148.863	118.39	12.1953	7.05583	12.4752
ath-miR156b-5p	20	52.4646	61.7069	87.5085	124.348	108.608	144.086	72.9317	73.6012	58.4195	29.6171	10.5837	18.7129
ath-miR408-5p	21	138.632	145.511	103.981	120.58	107.646	138.177	43.096	69.1741	55.8346	16.7249	13.7589	11.1192
ath-miR779.2	21	134.81	106.736	65.2024	43.8044	49.4981	55.4526	157.229	172.105	161.3	6.96872	8.46699	7.86482
ath-miR447a.2-3p	21	141.064	163.023	169.869	24.9638	54.3038	27.7263	116.975	101.271	173.708	8.36246	7.05583	3.25441
ath-miR841a-3p	21	74.7012	73.3811	75.4975	85.7248	66.3179	101.815	236.791	201.988	244.018	8.01403	4.58629	7.59362
ath-miR162a-3p	21	83.3874	80.886	112.903	27.3189	27.8727	80.4518	212.165	280.017	184.047	44.5998	21.5203	61.8338
ath-miR846-3p	21	184.495	168.443	97.4604	120.109	185.017	162.722	98.0316	102.931	77.548	33.4499	31.7512	37.6969
ath-miR166e-3p	21	46.2105	73.3811	68.6341	140.834	222.501	172.267	136.865	157.163	138.035	105.925	61.3857	56.9522
ath-miR390b-5p	21	133.072	141.342	181.88	141.776	83.1376	92.7241	119.816	179.299	124.077	129.27	0	159.466
ath-miR156c-5p	20	167.817	175.114	132.807	172.392	185.017	201.811	135.445	147.756	125.111	41.1154	22.2259	37.1545
ath-miR398b-5p	21	113.268	98.3974	64.1729	20.2537	21.6254	10.9087	429.066	437.733	325.702	12.1953	18.6979	10.0344
ath-miR171a-3p	21	348.49	361.902	235.072	110.218	206.643	114.996	89.5071	66.4071	69.7932	21.603	53.2715	15.4584
ath-miR775	20	103.887	130.502	73.4385	385.761	319.575	409.986	71.5109	79.1351	60.4874	53.3107	21.1675	78.9194
ath-miR166a-5p	21	102.15	120.078	127.659	74.4204	71.6041	99.9965	375.551	345.87	406.868	39.0248	34.5736	40.6801
ath-miR399c-3p	21	190.054	119.661	149.622	300.979	328.225	330.443	169.542	175.425	130.281	40.4186	19.7563	44.4769
ath-miR393b-3p	21	251.552	225.564	240.563	65.9421	64.8762	68.634	609.501	562.247	462.703	21.603	19.7563	19.2553
ath-miR168a-3p	21	95.8955	112.99	175.36	50.3986	64.3956	48.6347	676.276	869.379	837.001	13.2406	18.3452	11.1192
ath-miR167b	21	376.981	342.306	212.079	289.203	396.466	375.896	346.662	308.24	294.165	26.8296	27.8705	37.4257
ath-miR167a-5p	21	686.904	515.336	391.558	370.218	574.274	401.804	295.989	348.084	270.384	54.7044	71.9695	48.545
ath-miR161.2	21	714.7	528.678	331.16	197.826	355.137	245.446	656.385	649.683	548.006	42.8576	64.5608	38.7817
ath-miR390a-5p	21	426.318	415.687	270.762	714.059	577.638	844.062	370.815	290.531	316.396	130.663	203.208	150.516
ath-miR319c	21	833.874	700.456	394.303	360.798	530.543	419.531	529.939	470.384	399.114	78.3981	126.299	79.1906
ath-miR168b-5p	21	901.626	943.948	703.843	1314.13	711.235	921.786	116.975	161.591	174.224	113.59	26.1066	117.701
ath-miR162b-3p	21	571.204	603.31	506.177	690.979	599.744	891.333	1183.48	1205.84	1305.39	101.046	72.3222	118.244
ath-miR397b	21	636.524	534.515	469.8	1693.77	2544.59	1536.31	450.85	324.841	382.57	399.656	408.885	418.192
ath-miR408-3p	21	693.505	656.678	760.123	2719.64	2135.15	2702.63	501.05	484.772	456.499	218.121	161.931	278.794
ath-miR163	24	2158	2099.7	1306.45	1059.78	1510.89	1180.41	579.665	593.79	471.492	254.358	350.675	278.794
ath-miR396b-5p	21	1047.55	1067.78	1118.05	1409.28	1533.96	1741.76	2352.76	2483.63	2143.94	239.375	156.992	315.678
ath-miR319b	21	1822.36	1629.81	1365.82	2829.39	3836.34	3157.16	1699.21	1195.33	1333.83	473.524	473.799	417.107
ath-miR165b	21	3948.39	4484.17	3919.69	3673.45	3147.7	3722.6	995.47	1065.28	951.772	341.816	278.705	298.05
ath-miR319a	21	5278.08	5523.6	3393.61	2766.27	3552.81	3316.25	2046.82	1798.53	1722.6	498.96	854.461	564.64
ath-miR167d	22	7698.74	6797.34	4834.93	2994.71	3953.12	3700.33	2392.54	2367.41	2794.83	683.98	504.139	609.117
ath-miR398c-3p	21	5777.01	4378.68	8969.79	3055.48	4963.27	4485.3	2534.61	2245.67	2123.78	460.981	141.117	499.823
ath-miR403-3p	21	4607.15	4287.38	3152.71	5974.83	5398.66	6637.5	4160.89	3885.92	3205.83	1125.1	749.682	1196.27
ath-miR396a-5p	21	1704.23	1383.82	1492.79	1326.85	1815.57	1570.4	22850.4	14140.8	23342.5	400.353	350.322	342.527
ath-miR156d-5p	20	8495.09	7067.52	4929.3	11223.3	10686.3	12078.2	4212.52	4312.03	3844.83	2369.36	1021.33	2530.58
ath-miR168a-5p	21	6131.75	8404.22	6347.97	13661.3	12466.8	16104.9	1985.26	2727.12	4333.9	1331.37	898.56	1095.92
ath-miR157c-5p	21	10279.9	7833.85	5551.47	9011.46	11261.5	10012.4	6674.2	6388.36	5945.35	1737.65	2050.42	1711.55
ath-miR161.1	21	6510.47	5068.3	4383.32	21723.2	27629.1	19342.1	3630.96	2843.33	2692.47	2103.51	2452.25	1788.84
ath-miR398b-3p	21	22575.4	18570.8	16695.6	15361.2	14016.6	14580	12243.5	13653.9	10883.6	1250.19	373.253	1683.07
ath-miR158a-3p	20	19635.7	20160.6	17523	16328.7	18177.3	21277.4	51292.8	45254.2	41980.3	4297.61	4221.86	5060.07
ath-miR165a-3p	21	28477.8	31798.2	34995.5	62910.2	47949.7	59933.8	15655.7	16586.8	16444.8	4321.65	2250.1	4922.84
ath-miR159b-3p	21	62119.8	51098.7	34978.7	41036.3	53653.1	46746.1	28407.4	24751.6	25331.8	4731.41	5965.35	4551.56
ath-miR159a	21	67297.5	55498.2	40062.8	48089.2	160902	51118.2	43742	35857.6	41579.2	20001.3	28251.2	13818.2
ath-miR166a-3p	21	150263	173242	176238	279898	202387	261022	100799	124068	113391	14274.4	8582	16669.9
