# Supplementary material for: Biogenesis of phased siRNAs on membrane-bound polysomes in Arabidopsis
Source: eLife. 2016 Dec 12;5:e22750. doi: 10.7554/eLife.22750 (PMC5207768; doi:10.7554/eLife.22750)
Supplement: Supplementary file 3. — DOI: http://dx.doi.org/10.7554/eLife.22750.017 [file elife-22750-supp3.xlsx]

## Sheet: Table S3.1
Supplementary File 3. Transcript levels in microsome, cytosol, free polysome and membrane-bound polysome fractions as determined by RNA-seq
Notes: Tables 3.1, 3.2, and 3.3 are in three layers. FP: free polysome; MBP: membrane-bound polysome; cytosol: soluble fraction; microsome: membrane fracton
Gene expression values are in FPKM (fragments per kb per million).
Supplementary File 3.1. A list of genes used in the clustering analysis
Gene_ID	FP	MBP	cytosol	Microsome
AT1G01010	5.28675	6.51499	4.59223	4.71138
AT1G01020	8.21021	5.1383	19.8636	7.59697
AT1G01030	7.64707	6.60078	6.883	6.60839
AT1G01040	11.8212	6.92746	10.4741	6.26467
AT1G01050	132.487	101.516	117.964	109.301
AT1G01060	48.6472	33.5046	54.0192	37.7779
AT1G01070	2.54951	9.14113	7.33196	8.73684
AT1G01080	141.21	124.375	119.786	121.911
AT1G01090	196.009	221.597	172.456	208.688
AT1G01100	350.672	242.393	342.263	296.734
AT1G01110	5.78003	5.33027	6.95557	6.51972
AT1G01120	16.2781	66.0583	25.5542	64.8481
AT1G01130	29.1352	14.8004	29.4749	19.317
AT1G01140	59.1328	60.8251	50.2167	57.7504
AT1G01160	92.943	65.6884	76.3359	63.9443
AT1G01170	255.124	141.94	279.396	191.595
AT1G01180	11.3423	24.7007	18.7546	28.1232
AT1G01200	4.20568	2.36517	5.57425	3.13943
AT1G01210	27.3589	10.1611	44.9685	13.9425
AT1G01220	15.7843	14.5162	15.2789	14.4646
AT1G01225	9.87009	7.11373	8.72077	8.26074
AT1G01230	17.268	47.2907	23.9659	52.3395
AT1G01240	45.8736	26.2974	52.4439	32.6722
AT1G01250	5.4908	4.37927	4.31839	4.51556
AT1G01260	11.2416	8.13072	12.1845	7.97787
AT1G01290	38.7226	25.5525	37.9397	26.0002
AT1G01300	17.1541	67.5261	24.8447	69.7867
AT1G01320	84.9431	96.6467	75.4668	84.904
AT1G01340	3.39951	3.37872	3.64318	3.26408
AT1G01350	36.7563	31.1735	36.1738	30.0626
AT1G01360	29.6816	18.2824	24.1864	21.5041
AT1G01370	18.1601	7.73366	19.1326	13.0244
AT1G01380	12.9513	5.52692	13.5013	6.56864
AT1G01390	7.70497	9.83554	6.07421	8.93597
AT1G01420	10.9341	9.00519	11.3933	10.4229
AT1G01430	24.1705	83.421	50.784	84.4921
AT1G01440	23.0571	25.5847	21.7687	20.9058
AT1G01448	13.4216	4.77694	17.0764	6.52479
AT1G01470	167.764	131.633	146.696	140.153
AT1G01490	137.859	96.0812	141.429	109.033
AT1G01500	28.0405	24.7682	26.5666	23.8746
AT1G01510	36.0886	31.5704	40.309	31.7482
AT1G01520	3.11021	3.90036	2.98557	2.7271
AT1G01540	50.8535	66.8728	77.6711	72.4438
AT1G01550	128.411	139.101	125.833	140.631
AT1G01560	2.84337	2.43556	3.9383	2.28205
AT1G01600	1.96544	13.602	3.41437	10.6245
AT1G01610	15.2815	62.9257	27.0898	65.3545
AT1G01620	95.2945	293.322	146.712	291.777
AT1G01630	99.9824	85.4523	87.5877	85.5687
AT1G01640	5.77361	3.36422	6.67393	5.81566
AT1G01650	5.34706	18.9795	9.87697	19.7468
AT1G01680	3.11502	3.36466	3.32226	2.32639
AT1G01690	7.62406	7.76994	7.46833	6.4554
AT1G01700	2.73703	1.98962	2.74493	1.67064
AT1G01710	24.4212	22.8552	23.136	21.466
AT1G01720	56.9345	49.5143	65.4818	50.0103
AT1G01725	36.7129	6.11074	46.4921	16.5907
AT1G01730	52.9734	30.6343	53.5278	39.5984
AT1G01740	7.43554	4.04716	6.92729	5.30204
AT1G01750	6.03845	3.35943	7.30374	4.93084
AT1G01760	3.56823	2.4773	4.68979	2.81577
AT1G01770	13.1093	10.9904	16.5356	9.89684
AT1G01780	34.0717	18.4833	33.5652	18.1879
AT1G01790	57.6657	75.2048	39.7785	57.6333
AT1G01800	94.7922	70.0521	97.6008	76.9387
AT1G01810	5.22215	2.66643	4.88334	1.33913
AT1G01820	102.555	87.1435	93.1787	90.5716
AT1G01830	22.9564	19.674	23.1343	19.7982
AT1G01840	10.1594	5.50611	8.25142	6.82883
AT1G01860	27.5456	22.5041	19.9841	22.1048
AT1G01880	2.90133	2.56094	2.97487	2.59498
AT1G01900	1.80025	9.981	2.93696	9.3584
AT1G01910	63.747	56.6961	57.9459	59.2324
AT1G01920	13.0694	10.5487	15.8956	8.91552
AT1G01930	22.0068	20.7274	18.1423	18.1106
AT1G01940	71.4364	47.6117	70.835	55.5805
AT1G01950	14.2614	16.2834	12.4145	12.9013
AT1G01960	28.8094	31.0943	23.8009	27.4235
AT1G01970	50.159	36.9306	55.9211	42.4179
AT1G01990	39.8274	24.9824	52.9898	31.4105
AT1G02000	6.14743	22.4398	10.8202	20.6046
AT1G02010	7.49635	4.06114	10.8906	4.41935
AT1G02020	17.3905	24.3132	15.5267	18.5114
AT1G02050	18.1071	10.0301	23.7552	10.8489
AT1G02060	5.54089	3.97909	7.23664	4.07111
AT1G02065	12.8019	10.5392	6.77117	9.06003
AT1G02070	3.22908	1.08324	3.62085	1.41362
AT1G02080	16.4115	19.3943	13.2416	13.8608
AT1G02090	99.9815	90.043	73.6522	87.946
AT1G02100	38.5675	28.9676	47.7214	30.0489
AT1G02110	27.3372	24.6549	31.8439	25.5099
AT1G02120	47.7272	46.656	45.757	38.5707
AT1G02130	92.3234	65.2315	81.6286	77.9232
AT1G02140	188.663	135.35	186.618	158.407
AT1G02145	5.34331	10.9587	11.9157	10.2711
AT1G02150	117.104	99.7846	123.55	103.474
AT1G02160	79.0002	33.2965	101.408	46.6203
AT1G02170	79.1483	71.4629	65.4263	66.5119
AT1G02180	4.02157	14.1178	9.08614	15.7155
AT1G02205	10.4094	58.5113	17.7294	48.8456
AT1G02220	2.60391	1.81346	2.15822	1.93006
AT1G02260	5.89038	6.12268	11.1945	7.01836
AT1G02270	30.645	39.9179	32.4702	37.8074
AT1G02280	121.437	89.075	133.552	100.046
AT1G02290	19.9546	13.6654	19.2854	14.4695
AT1G02300	13.2838	10.1787	25.3564	10.326
AT1G02305	21.3406	62.935	45.5147	61.9526
AT1G02330	70.8752	62.7718	55.5041	60.752
AT1G02335	5.87821	24.4587	6.08983	21.4148
AT1G02340	4.53964	2.94317	4.40696	3.8002
AT1G02350	11.2157	3.1465	19.9781	6.40665
AT1G02370	6.58595	9.5223	7.23703	8.2049
AT1G02380	7.42186	7.96923	8.78464	7.8223
AT1G02400	3.66694	2.5805	2.53183	3.82434
AT1G02410	46.4443	35.7992	39.2622	32.9737
AT1G02420	4.94885	5.32056	5.48893	4.30241
AT1G02430	6.32429	4.45162	6.89697	5.1232
AT1G02450	8.07872	2.73192	7.75076	2.96707
AT1G02475	144.509	107.713	112.28	116.187
AT1G02500	239.451	212.12	308.129	232.097
AT1G02560	259.96	238.671	215.096	246.53
AT1G02610	20.7307	17.5447	26.0092	18.7884
AT1G02620	2.67373	0.345456	3.77825	0.599306
AT1G02640	9.42196	32.961	21.692	33.6192
AT1G02650	4.00792	3.68688	5.29248	3.0607
AT1G02660	30.4738	32.0056	39.187	32.0704
AT1G02680	44.7722	24.2294	46.7786	31.2582
AT1G02690	17.1559	19.8801	19.7973	17.5351
AT1G02700	4.38544	2.00944	5.68565	4.1916
AT1G02710	30.486	69.7183	27.1142	55.8559
AT1G02720	12.8259	13.8955	18.6588	13.8717
AT1G02730	10.4879	25.7841	10.5044	22.4298
AT1G02740	20.8368	14.4908	20.9957	14.7233
AT1G02750	32.7704	25.2129	48.1353	30.8014
AT1G02780	441.4	331.511	408.5	391.189
AT1G02800	1.19953	6.07093	2.27559	5.36931
AT1G02816	5.23178	27.3535	11.8533	28.5554
AT1G02820	49.8868	20.2036	58.487	38.3204
AT1G02840	115.417	100.89	111.596	94.657
AT1G02850	7.12908	18.3942	17.1814	18.1626
AT1G02860	16.8797	13.7516	13.9311	14.0811
AT1G02870	70.5082	39.7089	71.3606	57.9378
AT1G02880	25.7577	23.5798	32.0652	22.0977
AT1G02890	32.4662	38.9583	24.6809	31.8111
AT1G02900	5.17574	11.3998	9.54614	11.3905
AT1G02910	82.0953	81.3993	71.8956	78.3337
AT1G02920	70.8982	69.5654	60.0669	63.8706
AT1G02930	105.868	101.863	81.7869	100.65
AT1G02950	22.9947	14.1122	17.4564	17.4676
AT1G02960	12.8905	8.21546	13.9225	7.83039
AT1G02970	3.98457	3.13576	3.04105	3.16206
AT1G02990	10.4789	9.34006	7.49648	8.57173
AT1G03000	20.3452	18.1225	15.2244	15.2493
AT1G03020	18.675	4.6831	11.2749	16.8428
AT1G03030	31.235	30.7006	24.144	26.2221
AT1G03040	75.6878	66.9629	64.6129	62.0373
AT1G03055	24.3929	22.9425	15.41	19.2533
AT1G03060	8.16302	10.4671	6.36604	8.17043
AT1G03080	19.5067	21.4857	15.9154	18.1609
AT1G03090	36.4843	34.4076	34.5516	30.334
AT1G03100	3.51258	3.27024	2.99313	2.77573
AT1G03110	22.7804	22.7575	20.7702	20.3038
AT1G03120	5.89572	2.65765	4.22759	3.98331
AT1G03130	921.243	721.098	782.664	775.905
AT1G03140	75.4789	62.1086	71.7871	62.3112
AT1G03150	63.2507	41.7591	61.0486	49.2716
AT1G03160	39.079	43.1923	37.36	36.4385
AT1G03170	3.28777	2.50387	1.70236	2.32354
AT1G03180	7.02814	5.25672	4.75268	4.48073
AT1G03190	7.91738	8.73065	8.12318	7.90096
AT1G03210	31.0213	23.638	26.9402	20.7991
AT1G03220	21.2323	121.2	37.5074	115.018
AT1G03230	7.87712	61.8095	14.4157	58.1202
AT1G03250	71.9923	65.2954	54.3462	61.7223
AT1G03260	8.96045	13.6403	14.1163	14.4387
AT1G03270	1.66764	4.93456	2.7809	4.60323
AT1G03280	39.7334	29.099	37.8047	31.5299
AT1G03290	22.6213	25.2636	21.3018	22.5202
AT1G03300	8.50989	8.61476	9.23493	6.7866
AT1G03310	33.7947	30.2991	29.5331	29.2273
AT1G03320	3.03059	0.497257	2.5209	0.726878
AT1G03330	95.173	49.7871	99.3018	69.887
AT1G03340	5.26873	3.16063	6.93814	3.53853
AT1G03350	35.9405	49.7011	38.5743	50.0257
AT1G03360	19.3894	18.1471	18.542	18.2213
AT1G03365	12.4272	14.8117	13.6509	13.7527
AT1G03370	8.52304	13.6459	11.0041	12.6176
AT1G03380	19.0417	17.5266	17.4825	17.5361
AT1G03400	44.208	49.873	43.6196	45.2758
AT1G03410	12.4101	6.31533	15.7508	7.60742
AT1G03430	47.3125	32.1149	43.1043	29.819
AT1G03440	12.7083	35.263	18.7421	35.9941
AT1G03457	14.5093	16.0027	16.3593	14.8958
AT1G03470	18.7732	13.8421	20.4337	15.4433
AT1G03475	244.228	263.091	181.417	243.28
AT1G03495	5.21515	3.39814	9.33173	4.31533
AT1G03506	201.216	0	459.665	0
AT1G03510	5.22499	3.85053	4.80893	2.22457
AT1G03520	7.99186	11.8555	14.0443	11.3275
AT1G03530	20.8574	17.8021	17.2539	17.3522
AT1G03540	2.58572	1.85036	3.05943	1.83268
AT1G03550	7.10754	2.05604	9.91912	3.20552
AT1G03560	11.6556	8.25063	12.2201	8.53992
AT1G03580	4.56336	1.70042	6.62814	1.80452
AT1G03590	27.4196	25.5406	28.8065	26.1481
AT1G03600	564.471	430.839	531.004	527.294
AT1G03610	43.3654	34.9029	51.2111	38.5846
AT1G03620	4.57811	2.37324	4.96054	2.10808
AT1G03630	211.75	231.4	180.754	227.057
AT1G03650	11.297	5.29286	14.8078	7.51711
AT1G03660	6.50097	3.42085	7.15376	3.31791
AT1G03680	500.635	403.089	442.51	436.244
AT1G03687	34.8708	27.3088	33.3414	28.2331
AT1G03730	21.2579	18.6297	31.1305	22.615
AT1G03740	25.7314	28.9633	27.843	28.1543
AT1G03750	6.55515	6.88503	5.90479	5.89564
AT1G03760	24.4106	16.5038	20.5189	19.1293
AT1G03770	10.5871	7.74929	7.96783	6.55227
AT1G03780	16.9313	18.0931	12.4212	15.0726
AT1G03800	3.57974	0.919132	3.61583	1.79561
AT1G03820	3.70669	19.6544	7.25936	18.9349
AT1G03830	8.80791	7.99837	7.591	7.63842
AT1G03850	23.9427	12.2986	23.6242	16.8175
AT1G03860	92.4226	87.4566	85.3903	91.5343
AT1G03870	54.773	193.338	84.6134	215.868
AT1G03900	136.141	90.1645	127.707	99.4675
AT1G03905	3.78038	2.73078	3.91927	2.59825
AT1G03910	44.454	45.125	39.9895	41.08
AT1G03930	42.2512	30.5884	39.413	32.9582
AT1G03935	307.503	88.415	1183.85	285.534
AT1G03940	4.60175	3.6105	7.32874	3.70055
AT1G03950	37.1023	40.6477	31.7533	30.1748
AT1G03960	10.3068	7.67558	9.58086	5.64517
AT1G03970	62.001	55.4236	56.6783	54.6457
AT1G04000	57.1175	24.2788	56.7557	33.6662
AT1G04010	3.07314	4.55006	5.23142	3.97796
AT1G04020	6.66809	8.95307	5.81765	8.0568
AT1G04030	5.96221	5.05852	6.9394	4.61777
AT1G04040	50.7151	140.352	89.4874	148.385
AT1G04050	2.47901	2.3971	2.38284	1.62682
AT1G04070	37.6995	15.2329	36.4002	23.0236
AT1G04080	59.4751	64.4379	56.556	56.7579
AT1G04100	13.8751	7.01125	9.59595	8.17832
AT1G04120	5.81527	17.5488	8.53439	14.0246
AT1G04130	16.9816	13.088	14.5154	12.2562
AT1G04140	50.9886	43.8638	49.321	43.5559
AT1G04160	2.4028	3.48876	2.56417	2.39304
AT1G04170	84.4121	88.7246	70.5673	83.871
AT1G04190	57.9002	46.2729	49.4409	48.3229
AT1G04200	16.3765	17.9596	13.2157	14.006
AT1G04210	18.967	17.7407	19.8084	16.3173
AT1G04220	1.82318	4.30429	3.0919	2.98733
AT1G04230	16.6063	14.593	16.6021	16.9187
AT1G04240	52.3456	43.0092	59.5438	51.416
AT1G04250	43.1093	41.4724	33.2452	38.2331
AT1G04260	19.6765	36.3101	33.8038	40.0192
AT1G04270	310.901	231.242	311.395	278.289
AT1G04280	38.8411	33.3223	39.1917	35.4702
AT1G04290	62.5049	29.5564	56.7	42.869
AT1G04295	13.7015	13.9004	22.0212	11.912
AT1G04300	39.3683	35.0699	36.8671	30.7218
AT1G04310	3.48452	6.91723	7.13723	6.54801
AT1G04330	3.93335	1.4054	3.6968	3.60598
AT1G04340	7.71901	36.9999	23.0764	40.1463
AT1G04350	79.7107	57.6284	71.4209	63.9404
AT1G04360	2.18573	4.98467	3.77567	4.65758
AT1G04390	5.05873	3.90146	6.86404	2.773
AT1G04400	103.191	103.531	103.393	102.34
AT1G04410	307.155	312.553	266.104	308.994
AT1G04420	128.128	107.488	146.362	111.78
AT1G04425	27.1952	7.36358	43.9154	8.9398
AT1G04430	24.2312	76.3331	48.3161	78.0124
AT1G04440	55.8352	51.2709	51.2324	46.2703
AT1G04480	215.591	109.808	233.593	166.971
AT1G04510	47.5764	48.7039	39.1462	42.6659
AT1G04520	7.58247	31.1493	15.4571	32.9012
AT1G04530	79.3603	62.2818	62.8412	68.2228
AT1G04550	52.5175	41.6135	45.1872	42.4262
AT1G04555	4.73628	15.2802	13.671	15.335
AT1G04590	37.3993	22.9484	40.1345	27.3495
AT1G04620	50.9345	57.4595	36.4379	48.1542
AT1G04630	121.478	85.9954	117.325	107.903
AT1G04635	10.6135	4.08729	14.9066	6.0138
AT1G04640	89.0537	58.0455	103.395	75.6521
AT1G04680	12.9257	58.7685	28.4099	60.4158
AT1G04690	100.044	100.413	83.5309	101.51
AT1G04710	43.7618	42.2243	32.3674	38.0015
AT1G04730	4.11074	4.29067	3.37188	2.34771
AT1G04750	119.172	97.8939	109.807	105.363
AT1G04760	20.2091	12.9133	13.7808	13.5496
AT1G04770	52.9284	48.205	55.5609	43.4672
AT1G04778	7.53081	4.58443	7.22296	0.713171
AT1G04780	39.1023	31.6317	40.4066	32.2718
AT1G04790	26.4791	22.9837	24.6768	23.7655
AT1G04800	123.68	233.152	100.087	231.084
AT1G04810	24.3735	31.1202	25.7247	25.6917
AT1G04820	190.858	188.631	187.435	189.716
AT1G04830	26.0987	18.7898	22.2599	17.4579
AT1G04850	94.1737	82.49	78.9656	81.5203
AT1G04860	22.5479	19.1279	23.8025	19.4783
AT1G04870	38.025	39.5103	38.5023	35.7634
AT1G04900	9.68051	8.12419	12.2909	9.63626
AT1G04910	13.2226	22.0034	22.6021	21.7784
AT1G04930	12.6403	11.173	10.421	10.6906
AT1G04940	133.144	96.4397	121.98	110.674
AT1G04945	14.8807	8.96818	12.8515	9.98023
AT1G04950	21.3134	20.2918	24.1514	17.1824
AT1G04960	33.9833	30.7751	25.6964	27.9735
AT1G04970	9.84137	32.0422	17.9211	29.2687
AT1G04980	2.9102	15.4133	4.57279	14.0435
AT1G04985	86.9654	55.7184	95.8894	65.3947
AT1G04990	41.6141	29.7649	35.2945	32.4797
AT1G05000	11.2184	11.6594	9.99608	10.0555
AT1G05010	219.813	233.726	196.79	236.529
AT1G05030	13.4268	14.1354	15.2283	14.9491
AT1G05055	19.7462	15.1624	16.4234	15.3663
AT1G05060	37.7839	27.3126	33.9813	38.6578
AT1G05065	35.056	17.4626	37.1339	31.0534
AT1G05070	24.4787	43.0605	51.7445	52.8363
AT1G05120	14.2192	15.7988	8.89899	12.8261
AT1G05135	12.7258	30.9186	13.1372	30.3892
AT1G05140	89.1004	89.9616	85.5535	85.7936
AT1G05150	28.4455	30.1208	26.3254	28.5519
AT1G05160	5.86475	4.44789	9.70278	5.2638
AT1G05170	3.0043	8.5548	6.78843	9.23541
AT1G05180	40.2297	37.282	32.8809	35.0029
AT1G05190	567.594	417.971	526.389	476.742
AT1G05200	17.2276	21.7778	28.6438	21.0015
AT1G05205	109.897	49.1612	97.3713	65.7497
AT1G05210	5.60284	13.6745	9.14739	16.5557
AT1G05230	20.2051	22.5127	19.4665	19.7365
AT1G05270	52.5704	48.5054	49.5761	41.2099
AT1G05300	1.11061	6.43337	2.74177	4.23295
AT1G05310	3.74409	3.57052	7.09465	4.38078
AT1G05320	17.961	22.2851	14.979	18.172
AT1G05340	20.976	8.41036	18.8424	11.5135
AT1G05350	36.8513	37.3594	29.1206	30.6081
AT1G05360	2.82621	6.50299	6.50371	7.53722
AT1G05370	3.31636	4.27332	3.84832	3.48031
AT1G05380	13.5459	13.4573	15.4391	13.3319
AT1G05385	91.0964	53.9436	92.4189	66.7059
AT1G05410	25.5122	16.6562	26.6627	21.368
AT1G05420	9.12658	6.56486	6.18668	8.43576
AT1G05430	58.8002	55.025	57.135	54.6569
AT1G05460	11.4704	13.1498	9.27942	11.2769
AT1G05470	13.7447	11.2593	14.4935	10.9764
AT1G05500	7.68525	30.7177	16.605	27.5468
AT1G05520	29.3298	31.7027	24.8963	27.0507
AT1G05540	18.0576	12.413	18.1205	12.5359
AT1G05560	96.9302	104.044	83.1971	98.2068
AT1G05562	11.1113	8.53625	12.225	13.8552
AT1G05570	4.9494	10.7435	4.69967	7.02818
AT1G05575	37.3783	26.5244	43.062	35.902
AT1G05590	3.53092	20.3346	7.77293	16.4654
AT1G05600	8.51969	6.17069	11.0995	6.54954
AT1G05620	39.8253	29.7311	37.9074	28.9862
AT1G05630	12.5826	12.0921	14.3055	9.73404
AT1G05640	2.74063	3.15206	2.64247	2.83581
AT1G05670	4.57239	3.54888	5.02412	2.6534
AT1G05675	5.83665	5.85012	7.73515	5.4995
AT1G05680	6.76167	9.49587	4.4115	7.08455
AT1G05690	5.73155	3.94063	7.53838	4.66644
AT1G05710	18.6715	9.86141	21.1959	10.5298
AT1G05720	11.7089	34.7201	22.4341	40.1586
AT1G05730	2.2702	1.28236	3.43242	2.58144
AT1G05750	5.22884	3.50883	5.0831	4.04362
AT1G05760	21.7141	8.69316	20.0683	14.3955
AT1G05770	6.15282	1.94557	8.94064	3.17059
AT1G05780	17.6259	9.3106	26.6333	14.3456
AT1G05785	8.71385	11.5183	10.3345	16.1056
AT1G05790	11.911	12.4572	15.307	12.0724
AT1G05805	67.5194	56.1235	65.2207	54.1927
AT1G05810	30.5232	13.6869	49.2316	19.3484
AT1G05830	12.4074	9.40948	12.1584	7.32864
AT1G05835	50.2728	52.7682	94.6537	63.0153
AT1G05840	10.4784	17.8635	17.2952	16.6743
AT1G05850	78.1043	319.358	141.877	330.129
AT1G05860	24.721	23.4436	26.0253	20.8743
AT1G05870	59.1517	38.0244	60.4755	46.3213
AT1G05890	40.1983	31.4501	43.1778	28.473
AT1G05900	23.8126	18.1314	23.1881	20.4343
AT1G05910	9.44047	11.4065	9.6618	10.5244
AT1G05940	12.917	28.1138	16.9504	24.1845
AT1G05950	5.28955	5.0497	6.09401	3.55601
AT1G05960	20.2561	15.6565	25.7913	17.7885
AT1G05970	21.4742	11.3291	21.1619	13.8044
AT1G06000	85.0898	83.5436	72.8699	76.1305
AT1G06002	13.805	11.4128	11.1134	15.764
AT1G06010	24.3499	8.78807	33.4771	15.2948
AT1G06040	186.94	152.113	158.313	161.776
AT1G06050	10.1283	5.87363	11.8402	8.3947
AT1G06060	61.7248	50.7144	50.6917	53.9051
AT1G06070	31.9155	29.9543	24.1378	26.3453
AT1G06080	2.03855	11.5997	5.04089	10.1953
AT1G06100	3.52116	29.9667	7.80576	25.0622
AT1G06110	40.1182	23.2684	50.643	31.9152
AT1G06130	49.7768	43	46.2765	42.7097
AT1G06149	30.5113	21.5244	24.1175	19.6612
AT1G06150	4.5392	5.02584	4.40267	4.93407
AT1G06160	24.083	15.6873	18.9696	17.0738
AT1G06180	28.4096	20.4396	34.4171	19.2398
AT1G06190	147.308	126.02	134.742	124.906
AT1G06200	82.9394	67.1908	85.1637	71.0936
AT1G06210	39.5538	43.8976	35.4833	46.2102
AT1G06220	28.5805	32.6745	22.705	27.0436
AT1G06230	39.0044	37.5604	35.4764	33.1916
AT1G06240	43.6766	27.1678	38.4194	30.4353
AT1G06250	2.60214	0.937386	3.68787	1.39787
AT1G06265	2.41139	1.31498	3.54707	1.2724
AT1G06270	5.73247	3.80984	7.18162	4.84287
AT1G06290	37.0482	45.3378	27.4379	37.5014
AT1G06360	37.8745	99.1054	73.3321	102.067
AT1G06370	8.27591	3.85695	11.157	2.90936
AT1G06380	32.3895	24.3508	30.0232	25.6063
AT1G06390	88.5436	62.615	80.0007	67.4024
AT1G06400	121.03	91.6377	111.444	99.3443
AT1G06410	56.5865	68.0593	45.8028	60.826
AT1G06420	11.7341	8.03922	11.3745	7.23613
AT1G06430	87.7318	106.847	75.8521	100.661
AT1G06440	3.08133	2.37963	3.8363	3.32744
AT1G06450	9.68259	4.94423	12.4503	6.68729
AT1G06460	208.689	189.287	192.055	189.427
AT1G06470	11.522	19.9107	20.1422	20.3757
AT1G06475	12.7909	2.6979	14.0538	8.11638
AT1G06500	63.66	36.1318	64.1692	43.2178
AT1G06510	56.3526	31.5738	60.1969	42.746
AT1G06515	85.7568	39.43	83.2787	53.7687
AT1G06530	155.222	138.144	126.112	129.806
AT1G06550	36.0354	26.4645	36.1562	29.7889
AT1G06560	14.9212	13.509	15.2106	11.0254
AT1G06570	76.2875	76.0036	74.6882	73.3137
AT1G06580	2.3652	1.38638	4.56821	1.70728
AT1G06590	4.63415	4.02915	4.02801	3.07933
AT1G06620	8.26758	8.14524	8.43425	7.00118
AT1G06630	16.7624	13.6901	23.4508	16.7706
AT1G06640	60.7589	44.3683	90.8724	57.8984
AT1G06645	30.4876	19.9819	48.0609	25.2668
AT1G06650	105.038	99.578	95.2386	96.7276
AT1G06660	4.43226	6.07977	4.46365	4.72147
AT1G06670	14.7194	15.6913	15.3735	14.9646
AT1G06680	1422.98	1408.95	1166.18	1375.55
AT1G06690	76.0014	80.2669	57.4727	72.239
AT1G06700	77.882	66.1276	87.2121	65.1843
AT1G06720	17.7022	16.3342	14.6829	12.8496
AT1G06730	21.1495	21.6045	20.5687	21.3045
AT1G06760	226.068	225.779	200.663	235.442
AT1G06770	10.7148	10.5509	10.6468	9.19009
AT1G06780	3.93918	11.1271	8.43366	10.3413
AT1G06790	39.8789	16.1022	39.7466	23.7074
AT1G06800	17.4233	18.414	17.1848	17.8415
AT1G06820	50.9107	57.2003	35.2363	45.9045
AT1G06830	155.214	74.2599	146.17	103.057
AT1G06840	4.63698	8.93486	6.06346	7.41117
AT1G06850	29.4489	21.1797	33.3679	17.9233
AT1G06870	21.1404	20.0674	19.0788	19.1026
AT1G06890	32.1849	66.4875	49.2033	65.1709
AT1G06900	20.4791	20.3781	20.6742	17.693
AT1G06910	8.29905	8.51638	8.30143	7.7571
AT1G06950	66.8201	95.1533	56.8703	85.4023
AT1G06960	38.1577	20.9831	33.6852	24.6528
AT1G06980	11.095	7.11054	11.559	8.31839
AT1G07000	11.5879	9.34657	19.7056	9.07528
AT1G07010	86.3981	74.2021	85.2204	72.3826
AT1G07020	73.4652	47.7628	78.8111	52.3873
AT1G07030	38.7817	20.5183	55.7008	28.9428
AT1G07040	37.6504	28.9155	34.4399	32.339
AT1G07050	130.254	92.3324	120.98	99.1313
AT1G07070	87.0344	51.7813	92.3061	61.7205
AT1G07080	26.572	87.5668	40.3092	94.8755
AT1G07090	50.3542	34.873	45.0085	40.8118
AT1G07110	79.9165	76.9693	72.3736	75.5869
AT1G07119	4.29849	3.21354	5.98967	2.14235
AT1G07128	20.6597	5.94655	29.889	8.59224
AT1G07130	12.3465	5.85378	15.3614	10.8745
AT1G07135	91.4757	170.319	128.659	186.579
AT1G07140	154.562	142.996	159.355	143.75
AT1G07150	11.5823	10.654	12.0897	9.57001
AT1G07170	59.4992	32.2875	83.5049	44.0738
AT1G07180	51.3437	58.515	42.7507	50.7909
AT1G07200	30.4398	27.1566	36.586	26.6811
AT1G07210	73.1956	69.2614	66.2524	71.0414
AT1G07220	6.47908	12.5558	11.6238	13.7652
AT1G07230	4.53877	28.6139	9.88477	29.5201
AT1G07240	43.2298	35.1231	51.4322	35.9758
AT1G07250	54.4084	46.6775	57.7458	48.1322
AT1G07260	5.75174	4.4512	5.58557	4.69934
AT1G07280	109.983	122.011	103.185	109.887
AT1G07300	14.7373	3.83118	17.9897	6.75713
AT1G07310	49.5217	48.9031	37.477	51.2382
AT1G07320	455.699	445.163	430.652	445.341
AT1G07350	39.8206	31.1143	52.4956	36.2988
AT1G07360	53.748	59.2707	40.6872	50.3798
AT1G07370	46.7559	40.8512	36.2199	38.9857
AT1G07380	3.18132	6.92942	5.44664	6.58794
AT1G07400	10.1829	9.4163	8.3534	8.42425
AT1G07410	10.3904	6.86542	9.42958	6.67216
AT1G07420	22.8808	46.1518	33.8227	49.1817
AT1G07440	68.1389	50.6893	78.1946	58.3441
AT1G07450	12.6261	9.58644	8.18012	8.52373
AT1G07470	18.4344	15.2142	15.7472	15.8952
AT1G07480	19.0854	16.5246	18.4648	15.7693
AT1G07485	2.33221	4.7924e-05	1.92519	0.730205
AT1G07490	17.6896	5.0296	17.9528	10.1172
AT1G07510	21.4624	27.557	19.2168	25.3886
AT1G07520	14.1864	8.55724	16.4143	10.2944
AT1G07530	25.726	24.4842	28.7464	25.2496
AT1G07570	24.5919	27.3193	30.3797	28.342
AT1G07590	42.9842	19.0504	48.5923	29.9569
AT1G07600	3200.08	1558.03	3736.19	2029.28
AT1G07610	77.6983	26.3174	87.699	50.1662
AT1G07615	12.1376	9.71764	13.9317	9.68469
AT1G07630	12.9833	14.7046	13.9943	15.3108
AT1G07640	52.4967	32.8949	56.9468	43.3343
AT1G07650	11.0683	26.7224	20.5957	23.787
AT1G07660	64.783	30.7996	70.7614	42.6258
AT1G07670	4.99992	15.3187	9.45052	14.1151
AT1G07700	78.6866	41.2768	85.0233	52.4051
AT1G07705	24.2991	29.3274	19.7133	24.3214
AT1G07720	13.5744	52.511	24.1469	49.8144
AT1G07728	15.3728	7.67443	27.4882	10.3204
AT1G07740	5.29033	3.17981	5.69271	4.23034
AT1G07745	9.89944	4.91705	14.5116	6.43918
AT1G07750	46.1181	43.1122	33.8265	39.7743
AT1G07770	231.176	131.665	290.927	176.279
AT1G07780	8.41231	5.81778	10.2749	7.22586
AT1G07790	154.986	114.254	141.68	132.158
AT1G07810	7.46769	14.3159	11.034	13.1046
AT1G07820	178.971	119.146	174.358	137.605
AT1G07830	41.3974	24.0041	46.1511	32.1732
AT1G07840	39.4846	43.3893	31.7049	37.3639
AT1G07870	11.2122	10.8656	12.3337	10.4272
AT1G07880	10.973	6.62936	11.6883	6.53126
AT1G07890	451.315	408.445	387.729	435.081
AT1G07901	203.371	37.6411	229.829	80.0108
AT1G07910	9.91626	10.2345	8.79658	7.6323
AT1G07920	74.3635	71.3404	73.4895	71.7033
AT1G07930	95.1653	102.569	90.4341	102.237
AT1G07940	50.8797	46.8262	46.6916	51.9724
AT1G07950	43.7624	22.5425	58.7538	30.4053
AT1G07960	27.0247	38.0568	46.9903	42.555
AT1G07970	5.68162	10.8196	9.27183	9.9835
AT1G07980	59.2222	31.5365	43.2732	37.6436
AT1G07985	9.16246	5.34799	8.68701	6.79243
AT1G07990	30.3792	34.7195	25.4196	29.5194
AT1G08000	29.9146	26.3664	24.2477	22.9131
AT1G08005	51.9405	6.28059	34.1906	16.154
AT1G08010	67.0167	63.4835	59.1003	59.7538
AT1G08030	9.6604	13.4191	17.6964	13.8826
AT1G08040	4.84585	30.5301	11.2541	28.1859
AT1G08050	4.40862	6.12016	4.18003	4.31384
AT1G08060	7.41822	9.27397	6.08024	6.75433
AT1G08110	155.688	129.765	141.517	134.889
AT1G08125	50.4593	40.1413	38.6035	36.937
AT1G08130	16.3431	25.6609	11.7156	19.5098
AT1G08160	4.19496	24.7926	5.73738	25.3112
AT1G08165	11.2108	5.23911	25.3339	6.9625
AT1G08180	67.4076	26.342	72.1845	37.7814
AT1G08190	51.2653	44.4187	37.7647	38.5685
AT1G08200	192.077	174.481	168.107	175.513
AT1G08210	12.8363	14.8823	27.9939	17.5068
AT1G08220	10.0476	9.09013	9.26293	11.9023
AT1G08230	18.9059	11.8482	31.372	14.1864
AT1G08250	21.8777	17.3194	22.5768	21.8355
AT1G08260	3.92248	4.0529	2.97325	2.53204
AT1G08270	16.369	4.47911	11.3273	8.31967
AT1G08280	6.87301	8.52078	9.39329	7.33903
AT1G08300	5.79087	2.99419	8.20396	3.43563
AT1G08310	3.68998	2.45478	2.9716	2.44344
AT1G08315	34.6479	32.1285	31.0529	30.6608
AT1G08340	7.97099	4.33462	4.95026	5.50545
AT1G08350	3.36304	6.26774	6.61835	8.03931
AT1G08360	229.643	158.789	252.512	198.82
AT1G08370	63.8316	61.6542	46.475	55.5613
AT1G08380	2001.42	1154.31	1588.63	1552.43
AT1G08390	26.8865	12.9275	40.8127	18.2942
AT1G08400	4.35376	4.51118	5.26113	3.58301
AT1G08410	20.4569	20.1557	18.4112	19.0332
AT1G08420	40.1049	41.8059	31.7906	33.6271
AT1G08450	23.7884	79.0359	38.8625	71.8502
AT1G08460	39.38	26.6242	44.9936	33.0076
AT1G08465	45.3587	41.9516	39.2168	41.4169
AT1G08470	5.7907	34.9873	15.5486	33.4793
AT1G08480	161.605	93.6762	146.239	122.98
AT1G08490	60.0785	53.8045	52.914	57.1869
AT1G08500	2.71337	5.8177	5.27272	5.37391
AT1G08510	50.5808	85.2954	66.8746	81.0207
AT1G08520	143.451	153.991	112.255	142.559
AT1G08530	56.658	42.7873	40.0408	40.0006
AT1G08540	130.316	129.828	101.004	126.947
AT1G08550	135.435	125.799	149.018	128.29
AT1G08560	79.6098	75.1249	60.9646	75.6516
AT1G08570	132.598	117.354	123.15	120.139
AT1G08580	110.687	57.7586	112.051	79.8418
AT1G08590	2.52103	1.67762	3.78511	2.04736
AT1G08600	11.4923	11.9198	8.69036	9.4042
AT1G08610	11.8047	12.3528	9.99362	9.84711
AT1G08620	13.7475	14.4182	14.2121	11.984
AT1G08630	6.22587	6.06899	3.78363	5.79104
AT1G08640	144.572	119.989	118.179	119.246
AT1G08650	76.9331	62.1849	78.4287	60.8618
AT1G08660	11.1949	24.5868	31.9344	25.6696
AT1G08680	26.1321	29.1903	19.9046	24.7179
AT1G08700	13.7197	17.5426	29.2279	21.448
AT1G08710	24.0898	16.5715	26.7772	15.7673
AT1G08720	12.7508	14.5246	11.1344	11.6701
AT1G08750	3.11481	12.1977	6.84657	12.4261
AT1G08760	16.472	16.2689	17.4535	14.576
AT1G08770	25.1179	24.6676	35.583	33.2987
AT1G08780	94.7065	52.1007	81.7851	65.4769
AT1G08800	3.99814	8.64221	5.39215	8.59716
AT1G08810	62.2712	50.9026	68.9995	47.7095
AT1G08820	48.6556	50.3928	39.1301	43.0446
AT1G08830	59.175	36.4304	58.4961	42.2139
AT1G08840	2.65704	1.73216	2.06975	1.54017
AT1G08845	38.138	25.1509	34.8185	26.0757
AT1G08880	176.004	131.121	176.136	158.307
AT1G08890	3.2039	12.1202	9.68331	9.27098
AT1G08900	4.73851	10.3545	13.4256	12.6315
AT1G08910	11.9794	7.17056	17.4271	9.93872
AT1G08920	3.40615	8.94636	9.82393	8.83807
AT1G08930	47.8007	93.7594	91.0964	95.7739
AT1G08940	19.8006	15.4002	17.6895	13.4479
AT1G08960	3.25089	9.70135	6.95163	9.84959
AT1G08970	107.6	90.4683	94.2019	97.2134
AT1G08980	126.136	103.292	127.567	112.897
AT1G09000	3.99006	3.80091	2.18252	2.65588
AT1G09010	35.0891	37.8027	37.0411	35.4917
AT1G09020	48.6285	42.5756	38.8354	39.5306
AT1G09040	3.41682	4.04815	3.69223	3.15791
AT1G09050	3.33794	2.42757	4.01615	2.56531
AT1G09060	27.0551	27.2863	20.7906	20.6558
AT1G09070	225.298	227.851	204.041	230.317
AT1G09100	34.2878	32.4127	24.9179	30.1724
AT1G09130	277.944	253.1	230.345	246.262
AT1G09140	48.8769	38.5238	54.8146	37.6389
AT1G09150	103.26	66.7908	88.7998	75.5943
AT1G09160	41.1323	35.9563	39.923	33.7585
AT1G09190	8.90137	6.32602	8.51166	7.60841
AT1G09195	5.21223	3.92135	6.38672	3.45759
AT1G09200	337.073	246.681	306.043	291.451
AT1G09210	26.1019	107.711	53.9719	101.092
AT1G09220	3.27832	2.11191	2.86979	2.5692
AT1G09230	23.5507	16.129	20.2997	14.4756
AT1G09240	12.8406	11.0451	8.73639	11.9451
AT1G09250	87.9043	65.0191	83.9891	75.3747
AT1G09270	39.9935	51.1652	35.8325	43.2076
AT1G09280	16.2447	12.1802	21.172	13.1497
AT1G09290	25.921	16.9542	29.5769	20.8715
AT1G09300	7.72014	7.60073	8.17505	7.0504
AT1G09310	824.397	686.737	630.135	684.862
AT1G09320	12.229	10.6707	11.5271	10.5118
AT1G09330	19.7974	61.4471	35.7804	68.9906
AT1G09340	527.174	551.041	438.074	515.677
AT1G09390	5.53617	32.9938	8.85328	27.5364
AT1G09415	84.2424	40.8679	117.481	56.5943
AT1G09420	7.44925	6.33122	8.35242	6.37569
AT1G09421	11.6483	4.56065	9.17362	4.93953
AT1G09430	71.1768	76.5805	62.8689	68.2658
AT1G09440	4.74872	13.6335	8.59043	11.7577
AT1G09450	5.0863	4.92522	2.81113	4.92855
AT1G09460	3.23649	12.3941	4.4761	10.0362
AT1G09470	17.7106	12.1802	16.5638	12.0507
AT1G09480	2.79355	2.79212	2.24856	2.2002
AT1G09490	43.1836	45.8277	46.7055	47.9542
AT1G09500	13.8458	12.2259	13.7183	12.5016
AT1G09520	31.6924	20.2899	35.2762	30.95
AT1G09530	19.8454	16.5467	22.285	17.4615
AT1G09560	15.7363	70.8494	22.1231	74.1378
AT1G09570	44.442	46.2168	39.3848	43.3316
AT1G09575	10.2297	9.58138	14.4581	9.55735
AT1G09580	8.65413	29.6748	13.5473	30.6934
AT1G09590	271.625	175.901	247.774	227.43
AT1G09620	52.0874	59.4786	52.1469	54.5327
AT1G09630	50.8788	33.9267	39.2826	41.4615
AT1G09640	171.158	169.095	173.344	165.759
AT1G09645	59.2131	45.3036	74.969	53.717
AT1G09660	70.5953	40.0106	82.5909	47.8271
AT1G09680	3.52758	2.05243	3.59903	2.35451
AT1G09690	256.145	164.586	262.224	202.955
AT1G09700	13.5531	12.0247	13.0617	10.8131
AT1G09710	5.90975	5.04178	9.70537	5.94659
AT1G09730	19.8169	16.6454	20.442	16.1104
AT1G09740	24.2904	15.5124	19.5641	23.5941
AT1G09750	37.364	253.518	62.8996	235.897
AT1G09760	92.4963	67.3503	90.6443	73.7056
AT1G09770	70.949	71.7211	67.2481	63.2779
AT1G09780	121.973	131.17	104.256	126.891
AT1G09794	44.608	17.106	39.5159	21.464
AT1G09795	141.473	115.473	126.325	120.579
AT1G09800	7.74194	6.31305	6.99619	6.1716
AT1G09810	20.0364	21.3812	19.9957	19.1057
AT1G09812	10.5573	11.4988	16.6962	10.742
AT1G09815	112.842	69.6255	91.6881	89.0171
AT1G09820	7.91099	6.17661	5.56116	5.72191
AT1G09830	47.2531	54.1491	35.8002	48.2729
AT1G09840	61.7468	39.8824	57.606	42.9131
AT1G09850	6.67897	35.1905	12.6784	35.0721
AT1G09870	4.03714	24.8445	10.8386	26.4081
AT1G09890	3.56523	3.22559	2.18647	2.33088
AT1G09900	38.3095	37.9985	32.3081	32.4557
AT1G09910	12.5275	11.7354	9.56336	12.5374
AT1G09920	81.7856	65.7968	73.3267	64.5974
AT1G09932	9.66964	5.9635	6.81179	5.13396
AT1G09940	29.1394	24.6273	37.7065	25.1945
AT1G09950	2.33363	1.93312	2.79375	1.89922
AT1G09960	1.68968	6.2665	2.53849	5.67259
AT1G09970	28.9779	66.9775	41.9777	66.0117
AT1G09980	20.9976	12.7855	21.0165	14.4275
AT1G09995	8.06209	2.18998	13.1726	5.1602
AT1G10000	3.4757	1.72751	5.05953	2.86418
AT1G10020	51.1969	34.3164	63.0549	43.1716
AT1G10030	17.8389	17.4996	29.5065	21.6337
AT1G10040	3.56028	1.7289	2.91671	2.72713
AT1G10050	3.6245	4.16137	3.94435	4.16504
AT1G10060	31.0532	29.1844	29.7825	27.016
AT1G10070	10.5688	12.16	13.6328	12.5776
AT1G10090	5.35367	13.2611	9.59977	13.1731
AT1G10095	4.40117	3.30605	5.79822	4.19462
AT1G10120	32.8047	25.5932	27.2453	25.2837
AT1G10130	7.21763	11.7351	11.0792	10.2403
AT1G10140	39.8182	29.3275	34.2943	31.209
AT1G10150	26.1966	21.1822	28.4814	24.2286
AT1G10155	8.38515	6.00068	6.37786	7.87724
AT1G10170	25.0973	23.3913	22.9619	20.2216
AT1G10180	21.4179	22.7705	20.1653	21.565
AT1G10200	140.797	123.3	128.551	120.206
AT1G10210	10.0272	7.92616	11.6923	9.6378
AT1G10230	47.8433	25.6006	50.2394	32.9551
AT1G10240	10.7176	8.25979	11.4011	9.33454
AT1G10270	10.2161	14.8357	6.89186	12.4079
AT1G10280	3.13305	4.30552	6.43637	5.54364
AT1G10290	42.6656	52.6093	36.1358	43.5274
AT1G10310	91.4318	52.1293	86.8909	64.5272
AT1G10320	14.1584	8.21658	11.2121	7.72656
AT1G10330	2.50202	1.33814	2.14537	1.57197
AT1G10340	2.05721	2.50908	2.59535	2.68403
AT1G10350	26.6148	30.1269	25.8899	26.0291
AT1G10360	107.332	73.1026	124.625	85.8181
AT1G10370	41.4465	38.4407	35.1627	39.1105
AT1G10380	3.52408	17.991	6.22213	16.7794
AT1G10390	45.1086	51.9424	38.7362	47.2208
AT1G10410	32.2975	24.9775	35.6113	25.0148
AT1G10430	52.7823	39.4983	54.6138	38.19
AT1G10450	9.66145	10.9941	8.81265	7.26619
AT1G10470	107.982	71.8157	127.969	83.28
AT1G10490	9.52311	10.7804	8.90675	7.19165
AT1G10500	181.722	133.062	166.008	153.714
AT1G10510	50.8758	60.1838	37.4857	47.4167
AT1G10522	103.362	63.7321	108.48	71.6303
AT1G10550	2.32705	4.88006	3.44896	5.70559
AT1G10570	11.2854	9.99834	10.199	8.38336
AT1G10580	41.5429	46.4708	29.3484	40.0963
AT1G10585	6.77583	3.72739	7.32815	2.99867
AT1G10590	172.835	122.846	169.109	139.487
AT1G10600	32.2325	12.2244	53.4781	20.1359
AT1G10610	4.82652	3.48272	7.66593	2.50928
AT1G10630	102.625	80.9601	96.6042	94.1602
AT1G10640	4.45221	19.2109	7.93363	19.4005
AT1G10650	26.556	23.7487	30.7445	24.9744
AT1G10657	40.302	21.3073	49.0043	26.1373
AT1G10660	24.7596	16.8296	45.8009	22.7259
AT1G10670	172.209	162.988	149.318	154.437
AT1G10682	103.62	33.4111	137.123	64.9954
AT1G10690	20.1998	13.1889	18.0635	15.0855
AT1G10700	35.7222	34.0016	33.1175	32.2687
AT1G10720	25.5006	19.7005	27.8495	22.0028
AT1G10730	13.2456	10.5305	11.5724	9.01308
AT1G10740	28.8777	44.1479	57.496	44.3432
AT1G10750	1.95192	3.53858	3.44327	3.28329
AT1G10760	75.7289	79.4357	67.1636	67.165
AT1G10780	12.9671	9.83357	14.9624	10.7652
AT1G10820	29.8671	22.892	30.4535	20.5792
AT1G10830	66.6139	80.4917	55.6566	74.3841
AT1G10840	127.076	112.177	125.981	112.016
AT1G10850	14.8524	19.1188	21.1165	19.3506
AT1G10865	75.4987	29.0184	111.639	48.2678
AT1G10870	16.1008	15.8624	16.4529	13.9602
AT1G10890	47.3734	29.967	56.2453	27.7286
AT1G10900	27.8082	21.5662	21.4895	18.1032
AT1G10910	44.8448	41.816	43.0894	37.8174
AT1G10920	7.63412	4.28508	9.84405	4.50315
AT1G10930	10.3621	11.1876	6.48376	7.89378
AT1G10940	71.8993	68.2176	61.3641	62.9253
AT1G10950	25.4274	62.6258	43.2577	58.6443
AT1G10960	515.472	402.123	443.24	488.218
AT1G10970	3.78473	5.50801	8.02844	5.21258
AT1G10990	30.0486	22.5077	31.9164	26.704
AT1G11000	2.79683	5.55467	5.72436	6.3878
AT1G11020	13.0681	16.8898	16.652	18.3089
AT1G11050	12.8796	26.2386	19.3702	24.7904
AT1G11055	25.4275	4.24505	24.8034	29.1969
AT1G11060	8.87916	8.08168	9.20264	8.59469
AT1G11080	3.05007	10.3366	7.10094	8.69686
AT1G11090	30.303	23.2438	25.9043	26.0902
AT1G11112	8.78372	4.31636	9.62224	5.84367
AT1G11120	11.2353	17.1179	12.8119	15.7695
AT1G11125	0.593702	2.34222	3.6017	2.46572
AT1G11130	3.22978	15.5848	4.03292	12.4317
AT1G11150	6.6755	3.69306	8.8455	4.2097
AT1G11170	2.20173	3.42601	2.8403	3.01896
AT1G11175	20.4041	7.29751	72.6162	15.707
AT1G11180	11.4953	19.2275	20.275	20.6519
AT1G11185	2.42533	1.33433	5.14822	1.23821
AT1G11200	3.39481	24.0728	6.5201	22.8759
AT1G11210	15.7769	25.3826	21.4458	25.415
AT1G11220	4.93979	8.06969	7.15249	6.75364
AT1G11240	111.801	79.4498	93.1221	72.2322
AT1G11260	42.2854	147.353	87.3686	146.319
AT1G11270	7.11765	4.80598	8.71629	5.31568
AT1G11280	6.23947	20.8106	10.0039	17.9753
AT1G11290	7.8909	6.5135	8.72754	5.89557
AT1G11300	1.9646	3.83749	3.52545	3.04947
AT1G11310	27.1459	79.52	52.2634	72.8566
AT1G11320	8.7335	8.03838	8.65743	7.82339
AT1G11330	5.17106	15.2853	8.9919	11.8831
AT1G11340	1.52356	3.55301	2.8977	2.69152
AT1G11350	11.9368	26.2186	18.3002	22.2672
AT1G11360	48.6022	38.0741	47.771	42.0512
AT1G11380	23.7317	25.2877	31.43	28.7256
AT1G11390	12.6255	10.0246	15.2053	10.4444
AT1G11400	46.5805	29.471	66.0502	39.2166
AT1G11410	3.74085	15.0745	5.97019	13.838
AT1G11420	4.44998	3.4073	4.18544	3.64182
AT1G11430	236.514	213.353	189.248	217.901
AT1G11440	27.175	23.1676	24.5994	23.2063
AT1G11450	1.17136	4.59171	4.86848	3.90694
AT1G11475	102.022	49.656	101.263	71.7249
AT1G11480	61.19	47.2443	60.4003	50.8849
AT1G11520	6.90905	8.59227	5.32106	4.39289
AT1G11530	128.024	71.3152	124.011	93.476
AT1G11545	20.801	42.9863	51.707	49.5042
AT1G11570	11.412	3.48301	14.3756	8.87357
AT1G11580	9.97056	27.4666	16.0639	24.3868
AT1G11592	28.9358	11.5047	24.6106	14.7247
AT1G11600	3.35848	23.5479	6.61063	21.5979
AT1G11630	19.6233	12.9059	20.8879	13.2673
AT1G11650	232.813	231.096	206.253	219.426
AT1G11660	26.7591	31.8556	24.3105	24.6251
AT1G11670	3.08736	14.1899	5.80148	12.3255
AT1G11680	24.7211	78.2979	45.0624	77.3036
AT1G11700	45.109	34.1283	38.29	37.6863
AT1G11720	24.3178	25.7865	20.1344	20.4703
AT1G11740	3.05306	1.79595	3.90811	1.93489
AT1G11750	188.079	166.663	145.811	162.498
AT1G11755	9.82433	17.2895	15.9317	16.8913
AT1G11760	25.6689	13.7011	28.6343	20.5649
AT1G11780	16.7146	11.0824	16.9325	12.0583
AT1G11790	40.9613	33.7587	33.5324	32.6231
AT1G11800	13.7073	13.5205	13.1945	12.9233
AT1G11820	26.5538	38.3869	32.2758	42.2161
AT1G11840	224.665	208.997	192.856	209.854
AT1G11850	54.3476	50.3451	51.996	70.2934
AT1G11860	567.818	550.444	502.133	549.734
AT1G11870	48.8625	49.3181	41.8926	44.6008
AT1G11880	1.90494	4.88088	3.77314	4.03659
AT1G11890	89.2914	73.3017	71.6322	74.1659
AT1G11900	8.68877	6.44687	8.6758	5.54966
AT1G11905	6.82191	22.4116	12.4405	18.619
AT1G11910	35.5273	180.887	65.8941	175.656
AT1G11930	88.7331	62.2518	82.1798	69.5304
AT1G11940	2.83566	5.81115	4.57933	5.23428
AT1G11950	4.27143	4.96782	3.99994	3.58588
AT1G11960	2.23262	6.83101	5.68524	5.58354
AT1G12000	47.3462	55.3038	36.6842	55.8275
AT1G12010	8.66245	8.61657	9.56328	8.73805
AT1G12020	64.1165	43.5958	68.9238	53.0319
AT1G12030	9.35956	7.16293	7.11024	7.03954
AT1G12050	46.3912	54.7204	43.1414	48.4471
AT1G12060	47.3558	30.3501	41.1349	29.5652
AT1G12080	155.071	102.77	138.224	117.96
AT1G12090	202.432	495.016	258.366	550.269
AT1G12100	9.29806	3.4446	12.5438	5.75215
AT1G12110	14.2857	69.4437	25.2491	65.4666
AT1G12120	56.724	42.3301	80.6626	45.7358
AT1G12140	34.7768	39.2749	28.5942	36.9853
AT1G12200	17.8183	20.9971	14.8269	17.7589
AT1G12210	2.63961	3.08989	2.68223	2.30705
AT1G12220	6.21685	5.04689	6.26885	4.91691
AT1G12230	109.536	111.715	83.9619	110.072
AT1G12240	33.4454	100.482	70.5832	100.105
AT1G12244	38.3745	32.1599	36.6286	37.8941
AT1G12250	138.747	127.98	117.058	130.482
AT1G12260	5.68332	5.38917	5.10129	5.8639
AT1G12270	67.1171	79.6556	52.4818	70.9932
AT1G12280	6.83333	5.08593	8.32929	6.00684
AT1G12300	2.30969	2.33392	3.07354	2.45082
AT1G12310	130.441	91.6273	115.155	110.269
AT1G12320	39.6636	25.9442	37.8832	30.4907
AT1G12330	50.6995	49.3866	50.05	47.8433
AT1G12350	27.7972	22.4389	28.6269	20.8206
AT1G12360	35.3104	36.9866	29.1022	30.3318
AT1G12370	6.03763	6.30932	6.75174	7.03086
AT1G12380	8.29206	7.45867	9.20308	6.37544
AT1G12390	6.3126	11.5825	20.0285	13.8281
AT1G12400	32.5877	13.857	36.0194	17.4919
AT1G12410	222.301	189.468	196.776	195.046
AT1G12420	9.81444	8.10499	10.6905	7.97101
AT1G12430	24.3479	28.5766	20.0476	20.1399
AT1G12440	165.814	119.074	177.165	137.847
AT1G12450	6.24818	15.4711	13.0596	15.5702
AT1G12460	4.822	7.16463	8.04122	8.33111
AT1G12470	20.8816	27.4299	15.6276	22.0319
AT1G12480	4.08492	6.18527	7.67984	6.30805
AT1G12500	40.0679	75.5046	67.377	69.1789
AT1G12520	30.7151	16.2952	47.4339	20.1446
AT1G12530	85.9386	63.7882	68.0687	60.5388
AT1G12550	19.6933	13.7158	18.1119	16.7682
AT1G12580	57.1785	46.5129	64.5683	51.4901
AT1G12620	7.34461	5.38088	9.18678	5.30704
AT1G12630	4.99126	2.3332	4.31443	2.56565
AT1G12640	6.74852	23.2552	16.073	21.1756
AT1G12650	45.2433	37.864	45.2968	40.5597
AT1G12680	34.8741	20.7132	34.5731	24.9397
AT1G12700	4.7878	4.06128	4.3618	3.87079
AT1G12710	20.3692	8.6928	40.5246	15.4608
AT1G12730	4.44197	6.81825	9.77472	6.97211
AT1G12750	13.9135	6.55589	22.9943	8.83781
AT1G12760	28.4108	55.4968	37.3651	52.4674
AT1G12770	84.4288	83.5899	79.8452	79.536
AT1G12775	4.70639	5.10276	4.53784	4.07582
AT1G12780	78.6103	90.1671	72.2268	84.0234
AT1G12790	7.51667	5.79905	10.9036	5.03704
AT1G12800	102.463	95.279	93.1857	92.7357
AT1G12810	78.8707	48.8584	66.5565	57.5117
AT1G12820	51.3298	44.9993	58.6716	43.8139
AT1G12830	66.462	49.1487	57.5608	51.7929
AT1G12840	102.844	95.3982	91.8789	99.5768
AT1G12845	34.412	34.3257	55.122	41.3814
AT1G12850	40.7717	25.4819	49.7268	35.739
AT1G12860	57.2741	58.0986	51.6809	54.7207
AT1G12880	12.6129	5.76953	13.7386	5.15431
AT1G12900	521.259	437.199	528.813	492.37
AT1G12910	38.7738	30.2823	55.4085	36.2816
AT1G12920	83.5436	74.5901	87.0307	68.965
AT1G12930	10.8454	9.68122	10.6044	7.62253
AT1G12970	18.5686	19.6642	18.0648	15.9744
AT1G12990	14.9391	23.0739	24.5603	22.3644
AT1G13000	6.82251	22.6493	15.6692	19.9881
AT1G13020	43.1271	45.9132	33.2284	40.8059
AT1G13030	10.1294	11.2918	8.12517	10.1705
AT1G13040	3.15183	1.82433	4.16041	1.49009
AT1G13050	9.73511	6.28327	9.28751	5.50816
AT1G13060	173.032	154.3	144.816	158.863
AT1G13080	3.77514	18.6155	11.5735	18.3999
AT1G13090	29.6183	54.7019	46.8429	51.6843
AT1G13100	5.03435	17.3121	11.9024	16.8177
AT1G13110	25.9046	109.862	61.1294	101.829
AT1G13120	17.3844	16.7572	15.0891	13.688
AT1G13145	6.09744	2.7545	15.393	5.62825
AT1G13160	18.4599	22.8734	16.6226	20.0161
AT1G13170	23.1956	22.5044	20.8989	22.6197
AT1G13180	11.7035	11.7018	7.75954	10.2499
AT1G13190	41.2275	44.1072	36.2807	38.0646
AT1G13195	12.5828	12.5311	11.39	12.6971
AT1G13210	8.59938	23.3272	14.149	18.6796
AT1G13220	15.5832	11.4707	13.5903	13.3293
AT1G13245	211.818	108.265	245.648	144.404
AT1G13250	12.2771	42.1098	18.5792	37.5356
AT1G13260	123.449	111.307	121.253	116.375
AT1G13270	133.369	130.227	105.747	121.834
AT1G13280	75.5682	68.8767	64.4964	64.4662
AT1G13300	4.28064	4.1842	4.42219	3.84303
AT1G13320	46.3752	51.07	37.0041	46.4139
AT1G13330	8.7593	6.47481	5.8603	7.57224
AT1G13340	6.36112	6.40691	8.53575	6.27105
AT1G13350	25.4702	15.1613	30.146	13.0706
AT1G13360	116.885	84.0825	129.692	93.563
AT1G13370	3.33568	2.4791	3.3382	1.52231
AT1G13380	32.0526	50.9624	55.0534	58.9812
AT1G13390	40.008	30.8201	71.5404	34.8407
AT1G13410	2.94129	1.63649	2.46915	2.18021
AT1G13420	5.94896	5.26001	4.33293	4.97425
AT1G13440	381.615	391.621	348.828	389.419
AT1G13448	4.89441	0.831259	11.8528	3.40578
AT1G13450	35.1001	27.5002	42.2073	27.3736
AT1G13460	13.4662	9.32605	17.2825	10.4613
AT1G13470	3.60676	3.34818	2.89185	2.77187
AT1G13560	16.0904	48.3679	25.9265	52.4377
AT1G13570	14.6705	8.23334	19.648	8.95318
AT1G13580	2.90489	7.28297	7.46443	5.91436
AT1G13600	12.7448	6.37191	8.28016	7.01026
AT1G13609	84.2182	37.3406	211.091	66.8492
AT1G13630	2.88089	2.54486	3.39927	2.04795
AT1G13640	44.3005	29.8285	58.8325	35.2904
AT1G13650	26.5348	18.5019	33.0345	19.3771
AT1G13670	30.0209	19.2874	32.6359	19.3616
AT1G13690	59.0351	49.3125	53.6278	51.3643
AT1G13700	36.0487	29.627	47.0012	30.5732
AT1G13710	1.60375	10.8874	3.89095	10.3405
AT1G13730	40.9216	42.8228	34.5315	37.6907
AT1G13740	25.9366	17.5164	26.9232	18.3202
AT1G13750	0.92173	6.43234	2.48992	5.6209
AT1G13770	6.89672	10.4463	9.26162	8.32809
AT1G13780	9.69626	6.31675	11.4835	6.52017
AT1G13790	8.96183	9.41682	8.36077	8.18865
AT1G13810	10.0597	8.81295	10.5393	11.199
AT1G13820	70.5905	47.2331	89.6682	56.6022
AT1G13860	4.96732	10.4055	8.91552	9.21233
AT1G13870	36.3545	32.4805	35.8827	31.5038
AT1G13880	29.5401	31.4105	33.0389	29.6313
AT1G13900	2.07472	17.0645	4.11577	15.8424
AT1G13910	3.25643	4.62363	6.18259	4.34033
AT1G13920	13.9757	7.17961	13.6806	9.33343
AT1G13930	615.074	459.894	530.853	539.894
AT1G13940	11.5167	10.851	13.3962	9.31172
AT1G13950	35.6328	17.3745	35.0753	21.9639
AT1G13960	33.1126	28.6461	32.8038	26.1676
AT1G13980	16.3544	15.98	18.2618	13.5019
AT1G13990	85.9522	77.8864	63.7854	68.8159
AT1G14000	56.354	65.5211	43.6271	60.8245
AT1G14010	25.9902	56.1469	41.9346	66.6737
AT1G14020	7.81129	12.773	12.9801	15.0899
AT1G14030	52.1169	46.0967	52.9586	42.988
AT1G14040	3.17492	3.47038	3.68679	3.08071
AT1G14060	44.2212	39.0561	43.1862	44.9449
AT1G14070	3.00503	2.67678	6.10195	3.23461
AT1G14090	4.1328	2.52879	4.35323	2.38604
AT1G14120	12.532	11.9497	11.2035	10.8584
AT1G14130	16.4084	14.7458	17.8388	13.8008
AT1G14140	29.9373	17.8178	33.817	22.5898
AT1G14150	347.064	248.623	291.209	279.526
AT1G14170	9.53193	10.6377	12.8076	12.0465
AT1G14180	9.64856	8.85891	12.8684	9.49965
AT1G14200	51.4488	36.9742	54.5492	41.8421
AT1G14205	36.1231	21.6607	38.2818	24.6628
AT1G14210	18.583	34.9187	28.5768	41.8888
AT1G14230	7.47826	7.05034	13.7723	10.0578
AT1G14250	3.99865	24.76	10.0863	23.4256
AT1G14270	102.446	101.138	82.6255	100.357
AT1G14280	63.9876	62.1777	58.8512	59.8434
AT1G14290	46.6495	53.9778	69.7646	59.265
AT1G14300	26.1077	19.9701	24.0369	22.2612
AT1G14310	57.8473	51.4347	49.1686	50.259
AT1G14320	389.142	301.18	363.571	338.225
AT1G14330	12.9309	10.5642	15.4326	11.6523
AT1G14340	31.9298	27.4615	35.7258	29.9673
AT1G14345	270.21	218.523	259.499	245.594
AT1G14350	21.7346	17.537	20.5777	17.7355
AT1G14360	9.96683	29.4193	24.3716	31.1848
AT1G14370	9.9645	14.1377	15.2472	14.6022
AT1G14380	26.2762	32.3126	24.7936	31.9152
AT1G14400	180.635	108.064	191.507	147.385
AT1G14410	76.4056	70.1727	70.2195	69.7082
AT1G14430	4.02546	12.7668	4.65593	11.5451
AT1G14440	50.7763	44.7997	43.989	42.8659
AT1G14450	115.061	50.792	128.456	74.0755
AT1G14460	13.0794	11.5919	10.7261	9.78227
AT1G14470	2.34246	1.2507	2.1444	0.85013
AT1G14480	4.10034	4.24296	6.44062	3.14769
AT1G14490	7.38606	5.4583	7.94989	5.39649
AT1G14510	79.5645	61.7949	74.5335	69.9053
AT1G14520	11.8051	6.13531	15.6802	7.1403
AT1G14530	3.58059	10.3332	6.86955	8.66555
AT1G14560	15.924	9.20186	18.5977	12.7328
AT1G14570	50.7866	49.3544	43.8814	50.1414
AT1G14580	33.0151	35.4226	27.8603	30.9952
AT1G14590	6.51603	8.61832	16.2225	10.7072
AT1G14600	9.66619	9.04446	12.9681	7.41231
AT1G14610	41.7173	49.0671	35.0483	41.2078
AT1G14620	46.1276	32.2295	52.6545	34.7068
AT1G14630	18.5984	10.1456	19.1271	14.7257
AT1G14640	2.4032	0.997482	2.93267	0.829906
AT1G14650	48.501	46.7228	43.0712	47.4902
AT1G14660	2.16636	3.0354	4.27323	2.37766
AT1G14670	21.5793	55.9882	36.7881	60.124
AT1G14680	6.97147	5.19753	6.42866	5.30058
AT1G14685	65.5601	44.2462	87.09	53.8709
AT1G14687	21.4783	11.2429	22.9853	12.2935
AT1G14690	32.4708	28.0175	31.9809	27.1398
AT1G14700	27.8711	51.9236	46.5049	51.4853
AT1G14710	68.519	67.2629	66.7762	63.5035
AT1G14720	24.4257	95.3086	54.3171	91.9294
AT1G14730	1.36494	6.10613	3.06605	5.65308
AT1G14740	54.2073	49.2937	60.8795	47.5368
AT1G14760	9.01816	3.60711	9.38955	3.33235
AT1G14770	8.75457	6.51665	13.0869	6.50463
AT1G14790	6.31286	5.71986	5.47692	4.75678
AT1G14810	94.3918	100.369	79.3381	98.2364
AT1G14820	53.93	34.4823	55.7686	40.2976
AT1G14830	51.046	65.0374	44.5038	56.9809
AT1G14840	37.8882	39.3968	34.5001	34.3743
AT1G14850	15.3478	14.4525	12.7399	13.1453
AT1G14860	3.37834	1.46027	3.91314	2.99562
AT1G14870	26.8809	16.061	19.8869	16.3433
AT1G14880	35.8299	26.615	31.3935	29.8244
AT1G14890	12.8331	50.6352	24.3824	47.9251
AT1G14900	88.2195	72.505	73.8199	74.5772
AT1G14910	33.0657	31.407	29.0471	32.5692
AT1G14920	33.8529	35.7491	40.201	38.7451
AT1G14960	10.8126	6.58729	6.53936	7.42682
AT1G14970	3.7234	2.10927	9.10828	3.31966
AT1G14980	240.313	147.528	221.166	178.678
AT1G14990	64.6308	33.4317	61.7594	45.0529
AT1G15000	18.4782	26.7621	36.9606	29.2977
AT1G15010	45.5325	21.9822	35.4272	23.9998
AT1G15020	7.43204	13.8927	19.7383	16.0624
AT1G15030	52.5371	50.3831	48.3795	42.084
AT1G15040	4.38152	4.90635	2.33346	3.62016
AT1G15060	23.4868	23.4507	19.8454	19.7262
AT1G15080	2.7192	8.51477	4.13451	8.99992
AT1G15100	15.6245	18.9959	29.4717	23.5183
AT1G15110	4.31524	10.2925	6.96208	6.75073
AT1G15120	234.024	111.339	243.501	157.998
AT1G15125	198.679	175.481	193.783	182.355
AT1G15130	43.9742	51.2697	34.334	42.9643
AT1G15140	194.009	177.684	152.101	174.682
AT1G15160	5.71835	3.59995	5.75662	3.1376
AT1G15165	6.0757	3.16825	10.4539	3.33814
AT1G15170	5.91417	10.1817	9.63187	7.87158
AT1G15175	8.54534	2.37363	18.4354	3.82174
AT1G15180	28.0369	40.8567	41.728	37.7619
AT1G15200	58.8196	45.7141	49.5111	42.2796
AT1G15215	17.7505	11.8444	14.8404	11.4812
AT1G15220	13.7411	7.14235	12.5455	9.9884
AT1G15230	69.2173	29.6346	69.7464	41.5309
AT1G15240	12.0068	11.9029	13.2528	11.0546
AT1G15250	104.363	48.1817	100.127	64.1279
AT1G15260	122.685	78.4126	119.98	95.945
AT1G15270	301.98	155.832	312.264	217.115
AT1G15280	50.1705	50.5075	44.428	43.3804
AT1G15290	41.5371	41.2612	43.389	36.6425
AT1G15310	8.44951	7.14157	6.94102	7.12829
AT1G15340	169.344	189.153	123.085	165.29
AT1G15350	47.2254	21.1004	82.5876	35.293
AT1G15370	147.606	102.598	128.717	118.614
AT1G15380	5.9734	3.98405	5.39381	2.66812
AT1G15390	53.1631	36.2276	70.651	48.3742
AT1G15400	151.014	96.3851	168.349	120.161
AT1G15405	4.5503	1.80472	80.9106	17.3883
AT1G15410	26.0918	21.1705	27.37	21.1325
AT1G15415	2.92377	0	7.97806	1.6419
AT1G15420	38.3443	32.2988	38.3218	36.3955
AT1G15430	24.5436	18.7223	29.8402	22.3057
AT1G15440	19.6027	21.8123	17.6701	20.089
AT1G15470	29.1303	27.6439	25.2604	26.7517
AT1G15480	12.2331	12.7466	13.3729	9.84089
AT1G15490	6.63904	5.76738	8.64075	6.23224
AT1G15500	106.766	88.6159	143.035	97.4421
AT1G15510	9.65387	9.20313	10.7952	9.05616
AT1G15530	8.27004	22.4355	11.9267	20.4274
AT1G15550	22.9879	25.0299	21.2597	26.0753
AT1G15570	23.2223	18.307	25.5393	16.5179
AT1G15580	3.49374	0.90018	3.3611	2.73085
AT1G15660	18.9649	19.4705	13.424	16.0017
AT1G15670	24.3964	22.9625	26.0017	25.0304
AT1G15690	77.0858	226.914	137.921	216.72
AT1G15700	11.4873	10.5176	13.2663	11.2002
AT1G15710	37.0683	41.6068	33.6313	39.9319
AT1G15720	6.54285	5.73248	6.92302	6.10766
AT1G15730	94.9651	103.908	65.6135	93.7572
AT1G15740	45.1591	45.8996	45.4224	41.7454
AT1G15750	58.0483	59.2481	51.9739	51.8342
AT1G15760	6.00586	1.36375	5.47964	4.71873
AT1G15780	16.199	24.9379	10.712	18.5107
AT1G15790	14.5692	13.5956	6.33191	11.4806
AT1G15800	20.5801	14.7925	23.5682	16.3135
AT1G15810	46.3063	42.556	36.2826	41.9124
AT1G15820	1134.93	1037.13	964.523	1112.1
AT1G15825	34.8642	20.0472	39.5642	19.9106
AT1G15830	16.7942	8.51097	18.3266	9.05648
AT1G15860	79.1021	60.2795	72.9333	62.1069
AT1G15870	7.70322	7.06583	8.10009	5.55511
AT1G15880	59.4386	34.2179	77.9477	41.3834
AT1G15885	18.6251	8.65495	41.9988	14.7919
AT1G15890	2.78068	2.95622	3.47	2.85204
AT1G15900	9.58907	2.21083	11.9118	7.60851
AT1G15910	18.0228	19.7032	17.9336	16.6782
AT1G15920	20.8132	10.463	34.1567	15.8383
AT1G15930	214.12	139.553	249.091	169.324
AT1G15940	20.3227	20.2068	18.599	17.6403
AT1G15950	93.3044	93.3291	90.2485	99.6293
AT1G15960	3.6957	3.06461	11.2776	3.3002
AT1G15970	28.1918	21.8077	28.2086	25.3499
AT1G15980	204.43	229.311	155.872	212.124
AT1G16000	88.0715	44.8809	92.6835	68.3167
AT1G16010	49.2819	30.1408	53.1854	34.7867
AT1G16020	24.8252	20.9055	23.6551	20.8782
AT1G16030	7.25379	4.46081	8.2853	5.21044
AT1G16040	6.49519	13.1442	12.9817	16.0867
AT1G16060	8.4781	4.58083	14.6608	6.65652
AT1G16070	6.43396	6.68693	5.46786	6.70349
AT1G16080	146.743	140.919	122.253	135.816
AT1G16090	3.18558	3.0587	7.00631	2.11148
AT1G16110	3.23329	4.47215	6.07674	4.80126
AT1G16170	89.7093	47.0224	117.638	59.1238
AT1G16180	10.5494	88.0948	25.9063	87.1254
AT1G16190	41.1526	39.4571	33.5527	34.1743
AT1G16210	140.58	134.446	108.137	131.149
AT1G16220	4.78264	4.00165	8.25592	5.14891
AT1G16240	112.3	81.7625	108.092	89.9261
AT1G16250	9.86711	9.0347	15.8727	9.19145
AT1G16260	6.39067	10.1253	16.6881	12.4934
AT1G16270	14.8454	17.3112	10.6462	14.263
AT1G16280	25.0305	23.034	19.3602	20.7854
AT1G16300	9.55101	7.94607	9.24249	7.73384
AT1G16320	115.143	76.0825	118.087	89.4243
AT1G16330	3.6445	4.21452	2.26483	2.92122
AT1G16340	37.2624	25.8455	38.7499	27.0536
AT1G16350	75.9548	75.453	61.3982	71.4674
AT1G16390	8.038	22.0334	12.8572	21.7299
AT1G16400	1.97194	6.32843	3.64725	5.99908
AT1G16410	14.9345	83.7843	26.6529	83.2792
AT1G16430	27.4123	9.05691	34.4552	12.3476
AT1G16445	24.7672	14.0658	16.5323	14.9447
AT1G16460	76.0439	62.9828	69.0293	60.6143
AT1G16470	114.046	109.047	88.3633	108.701
AT1G16489	8.6204	1.45634	7.17681	6.46409
AT1G16490	3.4461	1.34537	4.6361	2.38476
AT1G16500	37.2477	17.9532	38.8477	26.2583
AT1G16510	26.0155	13.5303	21.7696	17.5035
AT1G16515	25.0507	12.974	26.3534	12.4423
AT1G16520	46.1089	36.9908	40.7765	36.2816
AT1G16530	6.21414	3.76563	6.72865	3.13352
AT1G16540	4.99111	3.97838	6.22594	3.3928
AT1G16550	4.85712	3.9203	5.32608	4.20882
AT1G16560	15.0923	46.7491	28.9235	51.5052
AT1G16570	6.98003	11.0013	12.0665	11.2054
AT1G16590	16.4902	8.24557	12.8227	9.76988
AT1G16610	84.6611	77.5039	62.3632	70.6473
AT1G16630	3.60432	8.9089	3.88137	6.92225
AT1G16640	14.1861	7.57691	12.7343	10.474
AT1G16650	8.44987	6.93022	11.9938	6.64094
AT1G16670	20.479	19.7261	17.3326	17.4478
AT1G16680	18.496	22.5954	19.3078	21.1882
AT1G16690	15.0361	9.92276	12.9232	11.1737
AT1G16700	85.3823	73.37	79.6033	78.0379
AT1G16710	9.43548	10.611	8.56985	8.78952
AT1G16720	172.179	169.353	145.823	156.621
AT1G16730	10.976	5.11492	15.0106	7.27045
AT1G16740	152.895	96.4737	142.423	118.298
AT1G16750	14.4198	13.8151	16.7529	15.1667
AT1G16780	6.52273	10.669	8.52775	9.01779
AT1G16790	73.8041	50.6272	65.6763	61.1688
AT1G16800	2.52772	2.57611	2.26322	2.10937
AT1G16810	181.823	109.974	160.5	135.721
AT1G16820	5.20337	0.804163	8.39139	4.33933
AT1G16825	9.04823	9.67259	15.0145	9.2929
AT1G16830	2.22734	1.44657	2.76478	2.47864
AT1G16840	110.168	82.724	101.824	94.6318
AT1G16850	3.05838	10.0517	5.20214	9.75066
AT1G16858	20.9692	33.7606	26.2895	31.7122
AT1G16870	32.5665	34.4699	28.5239	32.6945
AT1G16880	412.567	354.51	375.801	357.767
AT1G16890	157.701	114.67	138.649	127.033
AT1G16900	2.94935	13.5955	5.90036	13.4757
AT1G16916	22.4309	5.91818	41.2176	15.9305
AT1G16920	76.6384	50.1316	93.8559	57.7479
AT1G16930	4.25123	2.64578	5.58368	4.22294
AT1G16960	44.8752	24.9241	51.171	36.3442
AT1G16970	10.357	9.20923	8.02282	8.989
AT1G17020	3.73647	3.34338	1.65667	2.98134
AT1G17040	5.55484	6.28	6.62254	5.74396
AT1G17050	50.4121	57.7843	47.6389	53.5554
AT1G17060	1.86704	4.02616	3.99216	5.54403
AT1G17070	8.48096	10.5747	6.87499	9.31123
AT1G17080	109.582	78.5236	92.8548	93.5145
AT1G17090	16.3631	5.99266	29.8385	10.4618
AT1G17100	84.4744	139.677	138.798	166.158
AT1G17110	24.6653	25.8992	25.1032	24.4797
AT1G17120	10.3227	14.7551	18.3604	17.0066
AT1G17130	82.1535	66.0021	65.7871	68.8456
AT1G17140	64.8995	62.8257	67.8137	58.1211
AT1G17145	13.229	13.3229	20.1285	13.9982
AT1G17147	44.7368	21.8997	42.779	33.0904
AT1G17160	52.6042	54.5594	44.3575	50.2102
AT1G17170	26.8066	18.6495	20.4306	20.5381
AT1G17180	4.10674	3.59957	3.97754	3.94835
AT1G17190	27.4939	24.7836	18.794	28.023
AT1G17200	61.9976	77.9081	84.8553	91.0488
AT1G17210	32.1341	32.1365	33.6927	30.3111
AT1G17220	120.537	133.278	97.0614	119.494
AT1G17230	3.25324	6.11302	4.13617	5.15143
AT1G17255	2.40031	0.80957	3.00835	1.18868
AT1G17270	2.52881	4.68472	4.1633	4.98169
AT1G17280	71.3508	64.1112	57.1488	62.7318
AT1G17290	89.7889	105.115	79.3507	98.5076
AT1G17330	41.2675	33.384	34.1868	30.541
AT1G17340	17.0352	19.2245	18.1281	17.7818
AT1G17345	8.39485	4.60277	8.07108	6.10794
AT1G17350	26.5438	22.8598	21.5717	21.4939
AT1G17360	21.781	23.7096	22.177	22.2048
AT1G17370	74.519	77.1399	74.7447	76.1756
AT1G17380	8.00247	6.7026	7.68253	5.74812
AT1G17410	5.25567	5.61968	17.2701	5.83625
AT1G17420	11.3272	13.422	14.7643	11.849
AT1G17430	5.76491	23.9242	8.68728	22.9174
AT1G17440	33.7212	43.8553	25.1694	38.687
AT1G17450	4.38391	5.69121	4.0952	4.43279
AT1G17455	19.1657	7.43174	38.8507	16.2991
AT1G17460	7.75519	7.19062	6.76424	5.84968
AT1G17470	77.1076	66.8175	92.6617	65.4317
AT1G17480	4.68454	7.77095	6.28631	5.72156
AT1G17490	99.1878	47.6152	86.6542	60.0532
AT1G17500	4.45809	9.83318	5.99082	7.9847
AT1G17510	23.9705	10.5808	26.6966	20.2785
AT1G17520	27.6518	20.4839	29.0092	20.3464
AT1G17530	58.9554	43.019	80.271	59.4896
AT1G17550	38.3238	28.8172	40.136	27.0913
AT1G17560	31.5914	29.9686	24.5506	29.0043
AT1G17580	10.9262	12.5495	9.33537	9.42651
AT1G17590	10.4619	4.42141	9.6096	5.20396
AT1G17600	3.10865	2.97548	3.73254	2.65604
AT1G17610	5.94515	6.64903	7.64321	6.52492
AT1G17620	36.7341	115.018	51.0605	108.268
AT1G17630	2.98961	2.11051	2.33426	2.07922
AT1G17640	14.2524	16.6091	12.122	13.5913
AT1G17650	106.094	103.862	90.1514	107.104
AT1G17665	14.1588	30.9017	27.9903	25.7587
AT1G17680	15.1389	15.6188	12.4829	11.463
AT1G17690	15.398	17.5012	10.6465	12.3167
AT1G17700	12.7093	19.1062	12.285	17.6172
AT1G17710	10.1393	11.076	7.259	8.4304
AT1G17720	52.7766	47.2716	49.5539	43.5419
AT1G17730	89.8353	78.298	69.6853	77.8626
AT1G17745	18.5317	24.2053	14.4361	19.9489
AT1G17760	18.9183	18.5472	14.3862	15.2471
AT1G17780	27.3723	16.3804	31.4804	18.4946
AT1G17790	14.4464	13.4369	12.6966	12.3785
AT1G17820	5.01499	8.54832	10.3631	8.91439
AT1G17830	3.32223	2.73282	4.63518	2.42845
AT1G17840	34.9625	72.0154	37.5433	63.3624
AT1G17850	31.4811	20.1423	29.736	21.5132
AT1G17860	2.77375	28.6528	10.0932	28.9802
AT1G17870	3.46541	3.21213	4.84863	3.21342
AT1G17880	338.544	253.38	313.186	283.92
AT1G17890	46.8801	51.7849	40.0694	50.3849
AT1G17920	5.6052	4.9603	5.65856	4.42454
AT1G17930	11.1626	11.1472	13.2626	10.2137
AT1G17940	14.7008	15.2493	16.7992	14.1241
AT1G17970	23.4859	18.893	21.8398	21.8613
AT1G17980	19.4683	22.4735	16.3266	19.5351
AT1G18030	16.7301	11.5147	15.7514	12.9361
AT1G18040	19.4854	14.9179	18.1615	14.7215
AT1G18060	146.368	83.7157	169.296	112.547
AT1G18070	78.5375	83.4507	64.1068	74.511
AT1G18075	32.7716	3.50118	153.984	25.1868
AT1G18080	280.507	265.124	260.741	275.761
AT1G18090	8.46126	11.1371	9.71769	10.4455
AT1G18100	3.45263	0.939891	2.19169	1.09232
AT1G18150	51.6106	39.8149	49.2452	40.7304
AT1G18160	21.1749	17.3329	16.9543	14.9424
AT1G18170	129.486	114.667	114.554	124.483
AT1G18180	2.18011	10.1989	2.63144	8.77694
AT1G18190	21.3317	17.077	17.7405	15.3902
AT1G18200	3.17838	0.757335	5.04219	1.14497
AT1G18210	203.676	151.312	180.949	182.631
AT1G18250	10.5305	60.4432	17.6699	66.3826
AT1G18260	7.80986	35.6868	14.9635	33.2164
AT1G18265	7.00928	8.6163	12.9202	10.8554
AT1G18270	11.3262	15.4949	9.39808	11.1157
AT1G18300	46.6584	37.1553	64.3661	40.4272
AT1G18320	5.21797	1.33624	4.89462	2.99009
AT1G18330	5.72616	3.78893	11.0705	5.57451
AT1G18335	12.8584	7.52329	15.5525	8.62205
AT1G18340	14.366	11.1585	15.8735	10.2947
AT1G18360	45.4333	30.9619	42.4702	35.3241
AT1G18370	15.6174	22.0196	11.9108	15.9909
AT1G18382	5.998	7.45718	1.956	0.590377
AT1G18390	2.28439	6.5094	4.78863	6.57479
AT1G18400	42.9245	35.9665	28.624	34.402
AT1G18415	5.18001	2.0457	6.16403	3.27936
AT1G18440	45.013	39.7396	38.967	38.3404
AT1G18450	42.0849	40.5353	35.5586	34.831
AT1G18460	16.0264	33.4063	28.0533	31.8344
AT1G18470	8.35487	28.7963	17.1776	29.8554
AT1G18480	33.7245	24.9795	31.7811	28.6685
AT1G18485	15.9706	12.208	16.5467	12.1152
AT1G18490	22.1899	18.6188	20.403	19.5929
AT1G18500	81.2525	105.781	59.4358	94.8349
AT1G18540	454.976	326.711	430.155	378.8
AT1G18550	8.90417	12.0479	8.10257	9.21388
AT1G18560	4.19225	4.38541	4.48993	4.16565
AT1G18570	40.8036	25.1396	48.047	32.2107
AT1G18580	7.19914	18.0422	11.796	17.5164
AT1G18590	27.3269	30.2629	22.7453	30.2056
AT1G18600	29.5101	32.4702	28.6012	32.7536
AT1G18610	14.8048	10.5742	16.9641	10.2443
AT1G18620	40.8721	37.1247	43.2696	34.5919
AT1G18630	52.4638	29.6485	40.063	32.0377
AT1G18640	62.6566	50.804	63.9226	52.3329
AT1G18650	36.5608	84.8873	52.6567	81.8852
AT1G18660	38.0321	37.8902	34.0041	33.493
AT1G18670	10.8046	10.2628	13.0315	9.28307
AT1G18680	14.3919	6.8477	28.3081	13.6203
AT1G18690	3.79802	3.89087	6.32662	3.89784
AT1G18700	10.7375	29.3296	21.5982	25.1233
AT1G18710	17.433	11.4967	24.2694	13.642
AT1G18720	41.2471	113.752	52.4282	122.365
AT1G18730	398.225	279.243	357.63	318.14
AT1G18735	3.36628	0.350188	13.4443	3.24349
AT1G18740	36.4463	34.0423	37.5623	37.8547
AT1G18750	8.99461	5.38802	8.66536	5.29437
AT1G18773	5.12694	1.71502	12.1139	3.26055
AT1G18800	76.3215	61.6644	62.776	59.1117
AT1G18810	26.6438	31.8073	23.172	30.7646
AT1G18835	8.11214	7.91178	14.9417	8.66555
AT1G18840	29.3277	28.6122	24.2632	28.643
AT1G18850	15.9498	15.9725	17.783	18.291
AT1G18870	7.22926	8.02753	4.81838	5.77737
AT1G18890	23.0362	28.9398	23.4601	26.9249
AT1G18900	10.6711	9.30117	10.4557	7.61128
AT1G18910	3.09487	1.69717	3.06093	1.88782
AT1G18950	24.051	26.816	24.1727	22.4969
AT1G19000	207.926	188.497	206.127	191.805
AT1G19010	19.1761	11.1901	20.177	14.8672
AT1G19020	109.433	53.511	102.799	77.0554
AT1G19025	3.45178	2.71066	3.67691	1.52859
AT1G19050	49.6697	37.6484	47.6941	38.4629
AT1G19070	3.81489	2.62138	11.4452	2.69984
AT1G19080	10.7076	6.31258	8.93827	5.43988
AT1G19100	7.37313	6.92959	4.96064	4.25261
AT1G19110	33.2489	31.5193	32.6728	29.97
AT1G19120	64.102	33.2213	67.9382	41.8259
AT1G19130	85.9535	64.4754	82.2458	67.0599
AT1G19140	31.8308	26.1472	27.8718	26.1167
AT1G19150	229.974	178.272	218.81	204.024
AT1G19170	4.24717	12.6254	7.28624	11.6501
AT1G19180	44.0534	39.4748	36.2578	38.6974
AT1G19200	11.4637	9.13272	8.98793	8.0728
AT1G19220	4.67163	5.96004	3.72479	5.42825
AT1G19240	52.3327	19.1128	60.3677	29.3953
AT1G19270	9.56703	8.07215	12.542	7.50935
AT1G19290	5.17454	4.05137	5.7344	4.14898
AT1G19300	5.69984	18.2434	10.9952	18.3091
AT1G19310	40.4907	21.9348	38.9522	27.5579
AT1G19330	20.7505	11.1618	26.0384	15.3029
AT1G19340	3.08119	1.8431	4.51403	2.23255
AT1G19350	195.002	133.661	200.887	159.071
AT1G19360	4.70722	27.9156	12.0943	28.0489
AT1G19370	8.48623	20.8137	17.1708	20.8916
AT1G19380	21.7304	42.6539	41.7004	55.2495
AT1G19394	4.8747	0	9.12244	0.875031
AT1G19396	22.3311	11.3665	37.9934	9.63792
AT1G19397	3.50159	1.5533	11.1873	1.08065
AT1G19400	97.3063	64.0852	99.3911	75.1011
AT1G19430	3.68646	19.5851	4.60828	17.4121
AT1G19440	4.33857	17.0965	9.47188	17.7752
AT1G19450	12.5699	31.3786	15.425	30.8452
AT1G19480	13.545	15.7161	12.8423	13.6904
AT1G19485	11.678	6.42849	14.1257	7.07289
AT1G19490	3.04494	2.02042	3.99103	3.00835
AT1G19510	9.28259	5.58478	11.8291	7.03831
AT1G19520	25.0461	30.2836	23.1846	27.1546
AT1G19530	17.2694	8.56235	17.6292	10.1676
AT1G19540	10.7171	6.13611	11.1171	5.95342
AT1G19570	229.254	185.953	199.137	201.515
AT1G19580	46.2818	46.8413	42.3545	50.1019
AT1G19600	50.188	32.3997	67.0581	41.7853
AT1G19610	9.55155	3.6443	9.54778	5.85463
AT1G19620	1.97449	5.8755	6.07181	5.42239
AT1G19640	4.23139	4.7572	3.43641	2.86471
AT1G19650	12.0812	10.4619	14.9734	10.7565
AT1G19660	176.087	187.556	144.944	164.755
AT1G19670	104.622	101.808	118.294	98.9343
AT1G19680	20.8917	12.686	38.3509	19.272
AT1G19690	29.2868	27.629	30.2532	24.4941
AT1G19700	29.743	33.6975	30.4807	30.4431
AT1G19710	4.79726	10.4719	11.7305	11.9847
AT1G19715	55.0919	45.9245	58.281	41.1067
AT1G19720	27.9181	29.2717	30.4649	24.3875
AT1G19730	47.0288	19.1241	48.5877	26.7496
AT1G19740	177.392	187.193	143.873	180.707
AT1G19770	77.434	208.92	96.0991	203.326
AT1G19800	60.8698	53.1158	58.088	54.6443
AT1G19830	7.14413	3.18938	8.16322	5.12924
AT1G19835	36.8308	39.7381	33.972	38.358
AT1G19840	7.14259	4.6844	8.85444	6.161
AT1G19850	13.7978	15.3665	10.6578	12.7665
AT1G19860	24.0336	18.2816	24.6942	17.9281
AT1G19870	34.2845	46.2629	38.8401	41.7201
AT1G19880	52.7988	54.8791	46.4963	46.8885
AT1G19910	101.229	108.091	166.012	135.503
AT1G19920	77.5057	75.8529	72.0499	75.9875
AT1G19950	6.76373	24.3104	9.10286	22.1845
AT1G19960	154.771	64.2872	191.597	102.739
AT1G19970	5.85265	11.0682	11.3656	9.15613
AT1G19980	10.2254	9.4946	11.1552	8.47099
AT1G19990	42.282	32.9563	40.0682	37.0464
AT1G20010	216.36	202.966	223.022	208.496
AT1G20020	535.36	573.816	416.267	518.892
AT1G20030	7.37105	16.7015	12.7427	18.8496
AT1G20050	39.8194	57.3123	79.1437	63.8542
AT1G20060	2.87096	2.46629	2.28276	2.12123
AT1G20070	17.6339	14.2293	20.4283	13.7239
AT1G20090	104.845	68.5357	111.457	84.9422
AT1G20100	50.2987	28.8342	84.9238	36.0423
AT1G20110	54.3724	61.1493	38.5096	56.6326
AT1G20140	64.9325	46.5483	49.3855	47.8116
AT1G20190	19.5222	64.1747	47.1214	67.9605
AT1G20200	55.3237	71.0794	50.3676	61.1825
AT1G20220	110.111	103.84	86.5739	89.6866
AT1G20225	17.1848	54.4115	27.2379	62.9347
AT1G20230	3.10353	3.85374	3.38923	2.557
AT1G20260	137.369	140.647	113.508	136.99
AT1G20270	4.22387	21.238	8.20479	16.8942
AT1G20300	15.0916	16.5865	14.4343	15.8
AT1G20330	28.2217	131.903	54.923	129.558
AT1G20340	1810.69	1527.13	1358.74	1670.81
AT1G20350	2.82681	2.65149	4.54482	2.70446
AT1G20370	16.9548	18.391	13.9971	16.3127
AT1G20380	6.51217	4.69001	5.90837	4.71262
AT1G20390	8.71689	3.32217	7.75801	3.2148
AT1G20410	21.4681	19.2665	16.9266	15.9315
AT1G20430	51.3141	19.7824	84.3068	33.2123
AT1G20440	293.258	312.428	233.129	277.925
AT1G20450	182.167	180.86	146.469	169.418
AT1G20460	36.4983	23.2811	49.9264	24.3423
AT1G20470	37.8384	21.686	33.9815	23.9244
AT1G20480	4.34852	4.96955	5.40723	3.78363
AT1G20490	5.45141	3.56583	12.1231	4.1868
AT1G20510	49.2104	55.3547	54.0891	50.2273
AT1G20515	2.50264	0.351868	3.89986	0.958512
AT1G20540	29.3462	16.4536	29.6337	15.0383
AT1G20550	2.23947	4.62317	4.65414	4.26888
AT1G20560	30.6973	28.598	34.9	27.207
AT1G20575	54.4143	42.6569	43.0936	46.6368
AT1G20580	163.416	114.518	156.544	129.2
AT1G20610	8.9452	7.51385	10.387	6.42105
AT1G20620	476.22	490.768	423.816	488.577
AT1G20630	64.2843	77.1572	46.4137	71.1939
AT1G20640	18.4524	15.5957	19.9687	16.5622
AT1G20650	36.077	24.872	42.8158	28.1721
AT1G20670	21.2747	20.3522	22.0232	19.229
AT1G20693	281.699	230.167	253.007	232.097
AT1G20696	252.28	205.189	222.317	215.563
AT1G20760	32.5316	33.1175	26.7747	29.9853
AT1G20770	53.5515	39.3182	50.1744	41.923
AT1G20780	21.9217	18.516	23.1872	18.7845
AT1G20810	145.244	109.933	126.241	110.681
AT1G20816	34.4053	20.8919	39.0764	28.7751
AT1G20823	11.8992	35.9934	14.7118	34.6612
AT1G20830	56.6295	46.5741	48.2063	45.1802
AT1G20840	17.8328	42.5333	27.7189	41.2801
AT1G20850	6.45859	46.5774	9.09453	41.6052
AT1G20870	7.03938	6.46449	6.90087	5.78093
AT1G20880	14.2701	9.57746	12.0401	9.0799
AT1G20890	11.6512	17.4655	18.9865	18.8084
AT1G20900	7.54265	5.16099	8.0225	6.29496
AT1G20910	22.3361	24.3917	20.4258	20.4449
AT1G20920	21.3716	15.7002	20.0798	12.7856
AT1G20930	23.1554	21.1229	20.4872	21.5899
AT1G20950	35.0422	46.2414	28.3451	39.6561
AT1G20960	29.9729	38.7384	21.5773	31.5428
AT1G20970	35.3401	40.4172	30.9859	32.6361
AT1G20980	27.6043	29.0273	26.8487	25.4957
AT1G20990	3.53502	2.31739	2.3155	2.9726
AT1G21000	45.7991	39.0823	52.0162	43.9558
AT1G21010	24.5907	22.5679	25.2151	24.5679
AT1G21050	69.5695	59.193	63.1883	56.443
AT1G21060	27.8322	18.1851	29.8808	21.1351
AT1G21065	187.736	121.637	180.529	157.647
AT1G21070	5.84284	11.2341	9.85809	13.7075
AT1G21080	63.1069	64.5719	50.1331	60.9987
AT1G21090	4.05938	21.5409	6.68149	17.4756
AT1G21100	12.0919	16.5812	12.3005	13.938
AT1G21110	4.65812	5.1997	3.83981	4.16699
AT1G21120	2.79977	3.57033	2.53604	3.56915
AT1G21130	197.179	201.698	199.806	209.536
AT1G21140	6.75252	5.89951	7.64413	6.38425
AT1G21150	6.48545	5.45556	7.58038	5.49231
AT1G21160	16.4732	11.2269	13.887	8.5214
AT1G21170	10.2297	10.3435	8.4392	9.43676
AT1G21190	84.2528	33.3948	91.0953	57.0156
AT1G21200	10.8642	11.0658	10.4195	11.4975
AT1G21250	5.88002	24.7129	10.9201	24.62
AT1G21270	9.70621	32.7866	21.6502	31.7356
AT1G21280	26.6001	27.1511	24.3834	27.6064
AT1G21310	7.16667	63.1402	7.58957	46.1788
AT1G21326	5.02454	3.28869	3.71126	4.12287
AT1G21350	87.0789	66.9688	81.3001	63.8286
AT1G21370	6.21702	13.2886	12.3448	12.2971
AT1G21380	45.0865	47.6009	43.8103	44.7064
AT1G21390	11.8548	9.19773	14.2967	10.1556
AT1G21400	25.3216	28.1026	26.0813	29.0009
AT1G21410	20.9965	19.6431	19.621	19.0176
AT1G21440	89.7904	83.4917	80.1454	80.8684
AT1G21450	31.2027	31.1941	35.1098	29.3567
AT1G21460	6.7922	49.1984	15.9352	43.5163
AT1G21480	6.89383	15.1805	12.5805	16.3332
AT1G21500	524.298	336.531	511.287	398.241
AT1G21520	36.4069	11.2474	36.4857	17.5994
AT1G21525	6.57952	1.45307	8.47648	3.4107
AT1G21540	13.585	17.7318	11.3855	14.6287
AT1G21550	11.4928	9.50109	10.8274	9.17739
AT1G21560	31.3932	18.7058	31.5651	17.7513
AT1G21580	14.3785	13.2041	9.64763	10.48
AT1G21590	26.4668	22.5921	28.2522	22.6533
AT1G21600	132.733	111.632	133.14	120.495
AT1G21610	25.896	22.4043	25.1961	21.2091
AT1G21630	35.1877	39.892	29.1911	35.7976
AT1G21640	36.72	42.7578	31.0338	39.8446
AT1G21650	10.7225	14.2728	6.92471	10.5106
AT1G21651	7.03851	6.46333	6.70515	5.33679
AT1G21660	43.6688	42.229	35.8782	39.5237
AT1G21670	6.80284	40.4321	10.6581	36.3276
AT1G21680	39.0842	105.943	67.1344	96.8783
AT1G21690	46.9025	39.9832	43.4878	38.7766
AT1G21695	3.08289	1.51155	5.7905	1.86909
AT1G21700	24.0917	26.8962	18.8383	23.2828
AT1G21710	21.9638	14.0883	33.4843	19.2794
AT1G21720	148.794	125.797	119.166	127.76
AT1G21730	12.5165	15.4788	9.91955	11.0057
AT1G21740	6.67852	4.37216	6.78241	4.43699
AT1G21750	19.1216	91.5678	37.0704	82.0107
AT1G21760	44.8149	34.3392	37.9961	33.414
AT1G21770	157.96	72.624	183.097	107.14
AT1G21780	36.1075	26.6544	49.4636	26.3115
AT1G21790	5.6354	12.1856	13.2191	15.8644
AT1G21810	6.14079	5.87131	6.25213	6.19272
AT1G21830	84.5257	55.8847	84.8136	63.7373
AT1G21840	4.80711	2.24716	7.48851	3.65289
AT1G21880	9.20942	54.0387	13.5042	49.2546
AT1G21900	7.99654	30.5513	16.0399	33.4951
AT1G21910	43.8468	37.4216	35.7484	34.7568
AT1G21920	23.4773	25.5298	41.5876	28.8125
AT1G21930	123.845	61.321	135.815	86.3649
AT1G21980	24.9095	20.3948	23.4203	19.6322
AT1G22020	25.1463	22.0614	24.4762	20.1751
AT1G22030	8.71012	8.19885	10.8974	7.18969
AT1G22040	11.1993	9.8171	15.323	12.0073
AT1G22050	28.8232	12.3511	33.2388	20.8415
AT1G22060	11.6462	14.2129	9.5401	12.3038
AT1G22065	12.2621	4.46827	8.7219	4.25071
AT1G22070	46.5201	32.2116	47.5283	36.2563
AT1G22140	93.858	42.5508	100.373	54.0728
AT1G22160	35.4989	18.4988	46.6946	22.0577
AT1G22170	17.6318	19.1261	15.7406	17.562
AT1G22180	13.7355	10.5204	22.5731	11.5768
AT1G22190	47.9203	32.9364	113.105	42.619
AT1G22200	10.7815	35.6289	23.5363	32.6308
AT1G22220	5.13846	3.51024	5.73251	4.18522
AT1G22230	4.84164	5.37612	3.70436	4.1619
AT1G22250	38.6156	22.216	43.5024	33.1925
AT1G22270	80.1226	39.7681	84.711	57.5761
AT1G22280	55.7014	46.2717	47.0065	44.0569
AT1G22300	207.44	189.696	171.577	191.152
AT1G22310	14.2014	9.06313	17.2644	8.73329
AT1G22330	58.2144	51.4346	56.8115	47.4471
AT1G22350	14.1293	8.92301	18.3344	9.47879
AT1G22360	63.4524	71.8432	53.6002	66.5676
AT1G22370	23.8165	16.243	28.6356	20.1233
AT1G22380	2.63421	3.54084	3.51656	3.24841
AT1G22400	49.1501	56.2921	45.5135	50.714
AT1G22403	17.9418	6.23028	21.5206	9.73049
AT1G22410	87.7465	119.6	77.8091	111.318
AT1G22430	67.7107	57.8546	87.9492	58.6738
AT1G22450	101.835	80.0645	100.269	91.0166
AT1G22470	17.6726	12.516	19.185	15.0585
AT1G22490	6.5411	4.72809	7.1413	4.55914
AT1G22500	5.85732	10.6824	11.3973	13.2973
AT1G22510	24.802	16.1431	26.2303	19.4842
AT1G22520	107.866	46.8638	87.809	70.9101
AT1G22530	99.4795	122.347	86.4286	117.786
AT1G22540	10.5183	19.1067	12.7025	17.7958
AT1G22550	4.77685	12.4045	9.88608	10.6429
AT1G22570	9.66624	23.2396	20.313	22.092
AT1G22590	116.547	76.5339	102.317	90.5457
AT1G22610	31.9301	40.3554	30.7274	35.0261
AT1G22620	16.8708	19.8726	16.4478	17.6171
AT1G22630	233.432	119.815	256.029	152.061
AT1G22640	33.1472	25.5086	42.1845	31.9083
AT1G22650	15.5993	11.4174	14.9254	12.3728
AT1G22660	15.1905	17.9258	10.8855	15.7728
AT1G22690	182.899	214.633	208.906	265.561
AT1G22700	168.956	165.822	137.882	163.084
AT1G22710	21.1278	82.1093	32.268	81.0514
AT1G22730	22.7984	15.6622	31.1152	18.0184
AT1G22740	74.4926	63.6214	65.9279	58.5689
AT1G22750	10.8537	52.4178	22.2985	47.5223
AT1G22770	24.3235	29.6079	18.7824	24.2319
AT1G22780	237.538	165.21	246.04	194.743
AT1G22790	46.3297	20.8318	51.6	26.1849
AT1G22800	22.1144	17.1649	21.906	16.7375
AT1G22830	4.37802	2.9175	5.2034	3.08242
AT1G22840	201.026	125.23	207.956	162.786
AT1G22850	145.867	107.126	148.875	116.527
AT1G22860	9.50466	10.2721	7.99134	7.8134
AT1G22870	7.77253	8.90006	9.15494	7.84162
AT1G22880	9.51543	5.22263	18.6456	7.23972
AT1G22882	14.061	26.6956	18.2989	25.383
AT1G22885	97.2572	59.19	108.768	89.2437
AT1G22890	125.642	83.8541	169.577	114.985
AT1G22900	2.50329	13.0433	4.90435	15.8123
AT1G22910	33.2675	33.6681	38.8076	33.345
AT1G22920	55.6387	54.3495	46.1048	52.2329
AT1G22930	32.4709	42.5088	30.8377	34.674
AT1G22940	27.1311	27.6873	27.22	25.2457
AT1G22950	27.8784	23.8422	21.771	22.2068
AT1G22960	4.11031	3.8356	6.32796	3.10729
AT1G22970	25.7325	23.5354	29.1297	23.643
AT1G22985	25.1525	17.2834	22.4647	17.8382
AT1G23000	16.3176	15.1945	22.4418	15.6381
AT1G23010	1.36914	3.46267	2.45231	3.99647
AT1G23020	16.6377	27.0631	27.4078	27.2796
AT1G23030	28.1716	21.7299	41.3863	25.9487
AT1G23040	17.1923	22.0006	14.5369	22.456
AT1G23050	32.3117	19.1621	41.2732	27.7357
AT1G23060	2.68622	2.4655	4.05792	2.52007
AT1G23080	21.1406	92.323	37.2416	83.9053
AT1G23090	14.1133	35.1804	21.7041	34.1751
AT1G23100	49.1735	21.886	53.0301	34.8411
AT1G23110	12.7301	6.28955	14.2641	6.92295
AT1G23120	3.44026	0.696728	4.94689	1.36138
AT1G23130	536.239	446.483	494.92	470.44
AT1G23140	22.4145	13.449	18.2647	16.8743
AT1G23149	9.10479	3.81135	11.8152	4.48407
AT1G23170	10.0665	12.6627	9.90765	10.2519
AT1G23180	18.7734	23.8736	15.1975	22.8572
AT1G23190	57.0801	76.6793	42.7925	67.0558
AT1G23205	15.5362	62.5775	21.6028	67.472
AT1G23220	66.5875	27.0932	73.7147	42.6189
AT1G23230	11.14	14.3735	9.02592	10.78
AT1G23260	134.311	103.699	110.17	101.075
AT1G23280	67.2782	58.3902	51.9093	55.6058
AT1G23290	322.88	191.62	338.224	264.048
AT1G23310	475.381	435.564	479.981	430.49
AT1G23330	10.9954	16.3015	11.5504	14.2654
AT1G23340	3.36581	7.11421	3.96453	6.06995
AT1G23360	55.8873	37.0277	59.8948	40.2846
AT1G23380	10.4383	8.46627	9.88992	8.67976
AT1G23390	256.38	233.317	246.592	235.133
AT1G23400	88.7736	98.2351	78.9007	94.9822
AT1G23410	67.4807	31.8816	61.6225	43.0583
AT1G23440	88.2717	78.4233	71.918	76.122
AT1G23460	2.69235	10.1149	3.83139	7.66724
AT1G23465	2.88518	2.47882	4.49926	2.45929
AT1G23470	2.70715	1.0069	2.89223	1.41114
AT1G23480	10.2197	21.6866	23.3232	24.2442
AT1G23490	269.64	230.792	248.395	232.139
AT1G23530	2.14638	5.31217	3.43021	6.85266
AT1G23550	8.78388	7.49122	6.83862	6.35919
AT1G23710	76.5634	64.644	77.76	65.7067
AT1G23730	20.7933	16.0311	16.4879	14.3907
AT1G23740	179.237	184.062	150.723	182.423
AT1G23750	31.7608	19.886	35.9184	24.5257
AT1G23780	42.4955	37.7751	38.9793	37.2072
AT1G23790	8.38055	9.95093	8.65242	8.47363
AT1G23800	9.93215	10.1394	6.92918	8.76637
AT1G23820	120.228	118.651	118.547	112.416
AT1G23830	1.8607	6.77632	3.12027	5.71088
AT1G23840	1.25727	3.19255	3.2842	2.72771
AT1G23860	41.2445	27.8571	51.6666	34.5185
AT1G23870	44.8473	49.0996	44.4796	43.5987
AT1G23880	3.55078	8.63181	6.73179	7.98814
AT1G23890	2.14713	10.3505	3.28765	9.76501
AT1G23900	24.5081	27.2451	19.6527	22.6024
AT1G23950	31.7077	32.6481	24.885	32.8666
AT1G23960	45.9468	37.9751	47.0414	41.4902
AT1G23970	11.6517	11.7356	9.41419	10.9882
AT1G23980	6.34585	8.75536	8.50671	6.68785
AT1G24020	219.44	148.085	218.5	181.808
AT1G24030	6.0476	3.78405	6.75701	3.48119
AT1G24040	49.9861	47.7262	41.7117	43.5038
AT1G24050	72.1211	45.4952	85.733	58.9479
AT1G24070	2.63227	3.46464	4.67923	3.19478
AT1G24090	4.1653	2.90298	4.90915	2.47751
AT1G24095	6.45362	2.77008	9.02856	5.72189
AT1G24100	77.2331	72.6947	68.0927	72.8131
AT1G24120	49.4048	38.627	43.4278	38.9529
AT1G24140	4.37609	7.47588	6.67351	7.61745
AT1G24145	13.9324	31.6106	35.4678	30.7904
AT1G24147	21.5516	50.299	39.4108	45.6791
AT1G24148	48.312	19.5829	71.1042	28.301
AT1G24150	3.87702	6.73211	5.86311	6.66754
AT1G24160	83.7138	83.8261	76.0449	79.451
AT1G24170	26.1374	43.1546	39.3663	49.1473
AT1G24180	95.6045	91.0702	77.873	88.5821
AT1G24190	13.8879	17.4455	11.61	13.8908
AT1G24210	7.8279	4.63661	6.36605	3.78145
AT1G24240	34.9388	20.4463	30.8385	22.8611
AT1G24260	6.94983	5.60726	4.90907	5.82435
AT1G24265	4.30168	4.38631	4.05258	4.33236
AT1G24267	43.8174	42.8974	42.6138	40.5358
AT1G24280	19.884	23.891	19.0123	21.1652
AT1G24290	11.7189	9.40822	10.4849	9.65199
AT1G24300	16.5972	20.5282	13.7118	16.9402
AT1G24310	52.7137	40.7212	37.372	39.2357
AT1G24330	2.98158	2.17473	3.82038	2.18624
AT1G24340	13.03	12.8576	18.5185	11.4826
AT1G24350	40.7538	25.0766	50.3571	33.217
AT1G24360	165.284	164.85	136.383	160.134
AT1G24400	1.54174	7.75615	3.31266	6.28007
AT1G24405	3.98473	0.830856	4.6957	3.74919
AT1G24440	17.0888	15.7186	29.6578	18.6642
AT1G24450	9.57796	38.8737	22.9801	40.1246
AT1G24460	16.3321	19.5164	12.3309	15.0688
AT1G24470	1.7907	2.33992	3.25522	2.4418
AT1G24490	36.6493	49.9201	29.417	43.869
AT1G24510	133.079	135.243	110.582	131.862
AT1G24530	37.7483	33.0972	34.346	34.4859
AT1G24560	26.408	30.4789	25.1795	26.5144
AT1G24575	68.4198	35.1688	58.4906	41.3959
AT1G24577	28.539	8.37602	29.199	11.3516
AT1G24580	6.4463	4.76974	7.52215	3.90458
AT1G24600	19.9072	8.88005	20.3898	8.2003
AT1G24610	46.4704	39.9353	44.4236	43.031
AT1G24625	61.0548	38.3351	57.3451	41.4371
AT1G24706	15.2298	17.0333	11.6909	13.6268
AT1G24735	2.3147	1.41857	2.40643	2.51552
AT1G24764	31.0272	33.1061	28.9746	27.7644
AT1G25211	3.24656	3.34752	3.49028	3.48349
AT1G25220	50.8679	47.8712	45.9859	42.9901
AT1G25230	16.2095	59.6545	47.3403	64.2218
AT1G25250	13.7636	9.27708	12.883	10.0305
AT1G25260	89.8461	67.7484	95.4588	74.0637
AT1G25275	417.808	232.947	429.445	328.509
AT1G25280	47.1594	47.808	42.5351	41.8998
AT1G25290	31.4323	24.7501	32.6867	23.8971
AT1G25320	1.73266	7.66569	3.40348	7.55608
AT1G25350	52.5568	62.3694	43.3754	49.0601
AT1G25360	2.53313	1.7104	2.5114	1.58565
AT1G25370	17.4451	13.435	13.0971	14.9545
AT1G25375	12.6675	15.7716	10.6328	11.2769
AT1G25380	49.5419	36.4734	47.9882	37.5957
AT1G25390	9.69971	22.5107	17.5563	20.7638
AT1G25400	34.7709	66.0746	51.0226	67.5732
AT1G25420	34.4948	30.4968	35.838	29.8452
AT1G25422	2.29486	0.744448	2.02194	0.744173
AT1G25425	16.8141	13.5747	24.7346	21.2287
AT1G25440	167.55	144.176	171.49	153.635
AT1G25450	15.4448	74.7286	26.1932	69.2196
AT1G25470	9.76777	4.01845	14.132	8.69686
AT1G25472	2.27195	4.1215	0.321652	0.685336
AT1G25480	5.22819	11.3363	10.1658	9.66188
AT1G25490	76.6313	87.597	70.4649	76.0587
AT1G25500	2.79496	4.1613	3.84016	3.69307
AT1G25510	2.4686	13.7002	3.80804	14.2985
AT1G25520	8.6169	22.633	15.0772	23.7848
AT1G25530	2.19128	2.55958	5.05763	3.32466
AT1G25540	19.2744	24.0308	13.9627	21.4329
AT1G25550	121.568	108.57	144.353	118.916
AT1G25560	120.716	104.873	124.8	109.89
AT1G25570	6.8462	29.1381	15.5834	26.8226
AT1G25580	17.797	16.0038	13.6558	15.0667
AT1G25682	44.4921	40.8719	36.8416	38.6014
AT1G26090	29.4828	31.4773	22.4598	25.5178
AT1G26100	7.2413	9.68252	17.733	10.5666
AT1G26110	127.375	130.298	105.104	128.905
AT1G26120	28.7276	29.8313	25.3807	27.4455
AT1G26130	4.06396	5.10375	4.6813	4.49892
AT1G26150	50.2644	31.4134	52.6268	27.711
AT1G26160	63.5151	54.8663	63.2237	52.6452
AT1G26170	10.622	11.2878	9.21817	8.53734
AT1G26180	39.7781	25.0047	40.2378	28.2034
AT1G26190	13.9744	14.5437	14.3727	10.7048
AT1G26208	10.9335	5.53222	15.132	4.78584
AT1G26210	46.5798	21.624	59.3126	27.2891
AT1G26218	19.9712	9.16421	23.1059	16.919
AT1G26220	138.533	105.385	122.087	111.974
AT1G26230	33.9385	32.7175	35.9652	31.76
AT1G26260	9.63935	5.86979	8.17414	5.65479
AT1G26270	44.3258	38.3995	44.3584	35.9947
AT1G26290	20.1397	11.2348	14.0568	13.9328
AT1G26300	20.3384	23.2519	26.9909	23.7856
AT1G26340	75.514	48.8056	58.9633	51.5275
AT1G26370	15.5896	15.9812	13.3415	15.0757
AT1G26440	7.44482	9.10768	11.4646	9.70376
AT1G26450	6.98245	14.7894	9.93798	15.2555
AT1G26460	31.2383	42.4954	27.2522	35.9055
AT1G26470	55.9299	31.3824	68.441	39.4943
AT1G26500	3.80014	4.12639	4.18946	4.27067
AT1G26520	14.7577	9.6823	13.5136	9.62399
AT1G26540	3.98105	4.48068	3.71291	3.86453
AT1G26550	250.242	172.34	214.859	194.202
AT1G26560	5.8214	21.9031	12.3965	19.2361
AT1G26570	17.7795	20.261	17.1757	18.6546
AT1G26580	50.6713	27.2298	64.0751	30.4643
AT1G26600	4.43588	4.96613	5.43055	7.01257
AT1G26620	11.8237	10.8625	13.9095	10.5695
AT1G26630	397.664	300.504	358.801	366.586
AT1G26640	35.294	23.104	30.8843	22.6563
AT1G26650	16.7778	25.8292	23.409	25.4334
AT1G26660	28.9833	14.7592	24.7379	19.4207
AT1G26665	75.9107	51.4198	104.907	61.6065
AT1G26670	65.4173	49.3569	108.7	60.9261
AT1G26690	7.69368	35.5889	10.7766	31.6834
AT1G26730	1.83648	2.3989	2.52046	2.38899
AT1G26740	63.6668	41.2658	58.7421	47.5294
AT1G26750	76.6755	60.9908	63.7154	66.1347
AT1G26760	6.21403	6.67309	4.68235	4.11279
AT1G26761	54.5809	51.9756	49.0315	48.2259
AT1G26770	31.3032	61.0333	66.5134	67.7794
AT1G26800	28.7886	19.9606	30.249	24.1408
AT1G26810	2.14944	6.17227	3.40627	5.50967
AT1G26820	1.98573	7.31797	4.47076	7.29563
AT1G26830	46.1336	55.2643	42.5398	47.5365
AT1G26840	14.7297	9.06377	10.9405	7.79904
AT1G26850	23.7736	117.332	45.6901	113.222
AT1G26880	274.159	158.718	270.124	198.776
AT1G26900	7.12076	5.41765	7.72789	5.49445
AT1G26910	32.3514	30.321	30.0422	29.7466
AT1G26920	104.693	70.5906	115.682	86.1614
AT1G26930	13.6368	9.52536	15.0201	9.66527
AT1G26940	6.46753	18.0357	13.7528	19.554
AT1G26945	103.679	58.2918	89.8846	67.5305
AT1G26960	12.9129	9.90515	15.0079	10.1689
AT1G27000	70.265	67.7626	63.5403	72.2114
AT1G27020	89.5286	87.6584	78.423	83.6472
AT1G27030	37.0643	31.7463	32.6102	29.7439
AT1G27045	2.78104	1.54855	3.9129	2.89763
AT1G27050	57.7166	33.5325	58.5431	46.2703
AT1G27060	9.64185	8.56061	10.126	9.91908
AT1G27070	15.9496	8.07915	13.9145	9.71231
AT1G27090	137.912	143.604	135.956	136.764
AT1G27100	81.4116	84.4328	91.6889	85.1685
AT1G27120	4.54072	14.232	8.27247	12.9933
AT1G27130	125.279	105.799	111.633	119.894
AT1G27150	35.3557	29.3154	32.8506	28.4244
AT1G27190	13.5296	35.734	22.8764	35.4642
AT1G27200	7.41168	14.0263	13.8333	13.6437
AT1G27210	51.1269	46.0102	58.9598	45.4702
AT1G27290	132.456	99.9496	139.869	121.198
AT1G27300	49.7937	32.563	58.8769	39.6764
AT1G27310	188.904	116.365	209.096	150.224
AT1G27320	22.4021	43.2688	23.7116	36.1012
AT1G27330	248.676	114.813	244.828	160.66
AT1G27340	47.2592	25.2368	61.4419	32.5798
AT1G27350	231.58	119.929	225.891	145.132
AT1G27360	14.1171	8.19603	15.6173	9.64022
AT1G27370	10.7912	6.31036	23.5647	8.38357
AT1G27380	7.91019	1.80504	7.16399	3.65362
AT1G27385	167.888	134.405	134.023	134.022
AT1G27390	72.3086	64.3401	57.9414	58.4393
AT1G27400	310.257	214.658	299.782	237.078
AT1G27410	8.1842	5.81506	10.6802	6.64575
AT1G27420	3.49196	1.50231	4.75228	1.23638
AT1G27430	16.9228	20.118	15.1045	16.4882
AT1G27435	92.9537	40.8775	106.912	59.0016
AT1G27440	6.68947	8.28836	9.19792	9.47235
AT1G27450	227.512	171.921	221.925	188.347
AT1G27460	42.9282	41.0996	43.9378	40.6164
AT1G27470	12.513	13.0649	13.6338	11.5387
AT1G27480	41.5782	65.9069	61.1356	75.0185
AT1G27500	9.52681	10.3201	9.25643	9.61327
AT1G27510	56.1797	57.0373	50.1063	51.5343
AT1G27520	9.71175	7.47148	22.2317	9.57915
AT1G27530	177.736	113.65	174.036	140.768
AT1G27540	9.64772	8.89353	8.42089	8.50135
AT1G27590	7.41024	3.74355	10.2054	4.63727
AT1G27595	16.4063	16.6298	11.9342	12.7618
AT1G27600	19.6106	38.2322	28.6665	36.8025
AT1G27630	27.4885	17.4462	31.1216	17.7764
AT1G27650	106.537	89.9063	120.739	92.3977
AT1G27660	15.8963	13.381	16.6964	10.2286
AT1G27680	23.7115	25.2492	14.7723	20.4432
AT1G27690	27.8624	25.188	26.0064	24.1717
AT1G27695	39.6077	15.2578	42.2604	24.5629
AT1G27700	23.677	17.9193	24.7262	18.3812
AT1G27730	130.946	116.207	116.799	126.737
AT1G27750	11.0287	11.9081	9.63325	10.5323
AT1G27752	17.0413	17.5455	19.2381	14.8106
AT1G27760	49.9377	38.3179	43.1126	37.2863
AT1G27770	16.1606	21.1433	27.1647	21.0914
AT1G27840	26.696	16.8056	23.1583	19.8641
AT1G27850	19.4636	19.8897	16.6433	17.2264
AT1G27880	2.53141	2.71751	1.73272	1.53616
AT1G27900	17.2483	14.8219	13.9096	13.4854
AT1G27910	9.87479	12.8166	12.1193	10.8853
AT1G27920	7.57722	4.94056	7.14834	4.18191
AT1G27921	4.93288	1.33068	7.32279	3.39728
AT1G27930	15.4108	60.9066	32.705	64.2215
AT1G27950	155.103	315.198	191.645	340.629
AT1G27960	10.6954	8.90892	11.2018	9.32009
AT1G27970	200.203	120.42	182.605	160.486
AT1G27980	3.20643	14.3522	9.71549	11.8306
AT1G28010	3.47257	6.58196	6.00911	6.17929
AT1G28050	53.6723	41.2835	45.9397	38.9716
AT1G28060	34.6926	33.3179	32.241	32.6997
AT1G28070	12.9317	7.1712	18.8156	10.0766
AT1G28090	32.0968	23.9236	28.5864	23.9423
AT1G28100	31.2651	16.5312	38.4136	22.1061
AT1G28110	2.32298	17.5387	8.06533	17.2466
AT1G28120	51.541	47.3673	44.1188	45.4055
AT1G28130	26.4838	22.0059	25.138	22.6405
AT1G28140	127.076	110.301	125.67	113.204
AT1G28150	115.21	59.3821	145.115	88.7107
AT1G28190	27.1914	20.1708	33.2921	20.843
AT1G28200	101.23	77.979	78.0499	87.519
AT1G28210	5.61657	3.91843	5.18941	4.11916
AT1G28230	1.99855	12.1063	4.29351	13.7654
AT1G28240	12.9723	25.4655	16.5159	26.0093
AT1G28250	35.0015	26.1524	52.7521	36.9169
AT1G28260	11.7337	12.2206	12.9987	11.0601
AT1G28280	142.028	113.818	111.226	121.171
AT1G28290	13.2054	124.778	27.0795	124.043
AT1G28310	23.4808	17.5684	21.0443	18.8184
AT1G28320	29.4057	30.1231	26.7553	26.8454
AT1G28330	481.364	355.136	461.189	427.788
AT1G28340	9.8545	43.4835	18.4994	38.9559
AT1G28350	25.1481	26.6743	20.6883	22.0432
AT1G28360	3.89309	2.37018	2.72943	3.77987
AT1G28370	16.9724	11.2214	17.2747	13.2903
AT1G28380	36.2375	38.3506	36.8329	37.0705
AT1G28390	9.26459	5.973	10.928	5.4825
[truncated: 3,005 more rows]

## Sheet: Table S3.2
Supplementary File 3. Transcript levels in microsome, cytosol, free polysome and membrane-bound polysome fractions as determined by RNA-seq
Notes: Tables 3.1, 3.2, and 3.3 are in three layers. FP: free polysome; MBP: membrane-bound polysome; cytosol: soluble fraction; microsome: membrane fracton
Gene expression values are in FPKM (fragments per kb per million).
Supplementary File 3.2. A list of genes encoding proteins with transmembrane domains
Gene_ID	FP	MBP	cytosol	Microsome
AT1G01010	5.28675	6.51499	4.59223	4.71138
AT1G01070	2.54951	9.14113	7.33196	8.73684
AT1G01120	16.2781	66.0583	25.5542	64.8481
AT1G01180	11.3423	24.7007	18.7546	28.1232
AT1G01230	17.268	47.2907	23.9659	52.3395
AT1G01240	45.8736	26.2974	52.4439	32.6722
AT1G01340	3.39951	3.37872	3.64318	3.26408
AT1G01500	28.0405	24.7682	26.5666	23.8746
AT1G01540	50.8535	66.8728	77.6711	72.4438
AT1G01610	15.2815	62.9257	27.0898	65.3545
AT1G01650	5.34706	18.9795	9.87697	19.7468
AT1G01790	57.6657	75.2048	39.7785	57.6333
AT1G02000	6.14743	22.4398	10.8202	20.6046
AT1G02205	10.4094	58.5113	17.7294	48.8456
AT1G02260	5.89038	6.12268	11.1945	7.01836
AT1G02380	7.42186	7.96923	8.78464	7.8223
AT1G02410	46.4443	35.7992	39.2622	32.9737
AT1G02660	30.4738	32.0056	39.187	32.0704
AT1G02730	10.4879	25.7841	10.5044	22.4298
AT1G02910	82.0953	81.3993	71.8956	78.3337
AT1G03260	8.96045	13.6403	14.1163	14.4387
AT1G03270	1.66764	4.93456	2.7809	4.60323
AT1G03520	7.99186	11.8555	14.0443	11.3275
AT1G03660	6.50097	3.42085	7.15376	3.31791
AT1G03730	21.2579	18.6297	31.1305	22.615
AT1G04070	37.6995	15.2329	36.4002	23.0236
AT1G04120	5.81527	17.5488	8.53439	14.0246
AT1G04260	19.6765	36.3101	33.8038	40.0192
AT1G04310	3.48452	6.91723	7.13723	6.54801
AT1G04340	7.71901	36.9999	23.0764	40.1463
AT1G04360	2.18573	4.98467	3.77567	4.65758
AT1G04520	7.58247	31.1493	15.4571	32.9012
AT1G04750	119.172	97.8939	109.807	105.363
AT1G04760	20.2091	12.9133	13.7808	13.5496
AT1G04810	24.3735	31.1202	25.7247	25.6917
AT1G05030	13.4268	14.1354	15.2283	14.9491
AT1G05060	37.7839	27.3126	33.9813	38.6578
AT1G05140	89.1004	89.9616	85.5535	85.7936
AT1G05170	3.0043	8.5548	6.78843	9.23541
AT1G05200	17.2276	21.7778	28.6438	21.0015
AT1G05210	5.60284	13.6745	9.14739	16.5557
AT1G05270	52.5704	48.5054	49.5761	41.2099
AT1G05300	1.11061	6.43337	2.74177	4.23295
AT1G05320	17.961	22.2851	14.979	18.172
AT1G05360	2.82621	6.50299	6.50371	7.53722
AT1G05370	3.31636	4.27332	3.84832	3.48031
AT1G05570	4.9494	10.7435	4.69967	7.02818
AT1G05790	11.911	12.4572	15.307	12.0724
AT1G05940	12.917	28.1138	16.9504	24.1845
AT1G06080	2.03855	11.5997	5.04089	10.1953
AT1G06470	11.522	19.9107	20.1422	20.3757
AT1G06475	12.7909	2.6979	14.0538	8.11638
AT1G06530	155.222	138.144	126.112	129.806
AT1G06840	4.63698	8.93486	6.06346	7.41117
AT1G06890	32.1849	66.4875	49.2033	65.1709
AT1G07150	11.5823	10.654	12.0897	9.57001
AT1G07420	22.8808	46.1518	33.8227	49.1817
AT1G07810	7.46769	14.3159	11.034	13.1046
AT1G07970	5.68162	10.8196	9.27183	9.9835
AT1G08040	4.84585	30.5301	11.2541	28.1859
AT1G08160	4.19496	24.7926	5.73738	25.3112
AT1G08210	12.8363	14.8823	27.9939	17.5068
AT1G08220	10.0476	9.09013	9.26293	11.9023
AT1G08230	18.9059	11.8482	31.372	14.1864
AT1G08350	3.36304	6.26774	6.61835	8.03931
AT1G08380	2001.42	1154.31	1588.63	1552.43
AT1G08530	56.658	42.7873	40.0408	40.0006
AT1G08560	79.6098	75.1249	60.9646	75.6516
AT1G08590	2.52103	1.67762	3.78511	2.04736
AT1G08640	144.572	119.989	118.179	119.246
AT1G08700	13.7197	17.5426	29.2279	21.448
AT1G08770	25.1179	24.6676	35.583	33.2987
AT1G08820	48.6556	50.3928	39.1301	43.0446
AT1G08920	3.40615	8.94636	9.82393	8.83807
AT1G08930	47.8007	93.7594	91.0964	95.7739
AT1G08960	3.25089	9.70135	6.95163	9.84959
AT1G09330	19.7974	61.4471	35.7804	68.9906
AT1G09460	3.23649	12.3941	4.4761	10.0362
AT1G09575	10.2297	9.58138	14.4581	9.55735
AT1G09580	8.65413	29.6748	13.5473	30.6934
AT1G09812	10.5573	11.4988	16.6962	10.742
AT1G09920	81.7856	65.7968	73.3267	64.5974
AT1G09960	1.68968	6.2665	2.53849	5.67259
AT1G09970	28.9779	66.9775	41.9777	66.0117
AT1G10030	17.8389	17.4996	29.5065	21.6337
AT1G10130	7.21763	11.7351	11.0792	10.2403
AT1G10150	26.1966	21.1822	28.4814	24.2286
AT1G10280	3.13305	4.30552	6.43637	5.54364
AT1G10340	2.05721	2.50908	2.59535	2.68403
AT1G10660	24.7596	16.8296	45.8009	22.7259
AT1G10750	1.95192	3.53858	3.44327	3.28329
AT1G10830	66.6139	80.4917	55.6566	74.3841
AT1G10950	25.4274	62.6258	43.2577	58.6443
AT1G10970	3.78473	5.50801	8.02844	5.21258
AT1G10990	30.0486	22.5077	31.9164	26.704
AT1G11000	2.79683	5.55467	5.72436	6.3878
AT1G11020	13.0681	16.8898	16.652	18.3089
AT1G11050	12.8796	26.2386	19.3702	24.7904
AT1G11130	3.22978	15.5848	4.03292	12.4317
AT1G11180	11.4953	19.2275	20.275	20.6519
AT1G11200	3.39481	24.0728	6.5201	22.8759
AT1G11210	15.7769	25.3826	21.4458	25.415
AT1G11220	4.93979	8.06969	7.15249	6.75364
AT1G11260	42.2854	147.353	87.3686	146.319
AT1G11310	27.1459	79.52	52.2634	72.8566
AT1G11330	5.17106	15.2853	8.9919	11.8831
AT1G11340	1.52356	3.55301	2.8977	2.69152
AT1G11350	11.9368	26.2186	18.3002	22.2672
AT1G11380	23.7317	25.2877	31.43	28.7256
AT1G11390	12.6255	10.0246	15.2053	10.4444
AT1G11450	1.17136	4.59171	4.86848	3.90694
AT1G11580	9.97056	27.4666	16.0639	24.3868
AT1G11670	3.08736	14.1899	5.80148	12.3255
AT1G11820	26.5538	38.3869	32.2758	42.2161
AT1G11850	54.3476	50.3451	51.996	70.2934
AT1G11880	1.90494	4.88088	3.77314	4.03659
AT1G11890	89.2914	73.3017	71.6322	74.1659
AT1G11905	6.82191	22.4116	12.4405	18.619
AT1G11940	2.83566	5.81115	4.57933	5.23428
AT1G11960	2.23262	6.83101	5.68524	5.58354
AT1G12110	14.2857	69.4437	25.2491	65.4666
AT1G12240	33.4454	100.482	70.5832	100.105
AT1G12450	6.24818	15.4711	13.0596	15.5702
AT1G12460	4.822	7.16463	8.04122	8.33111
AT1G12480	4.08492	6.18527	7.67984	6.30805
AT1G12500	40.0679	75.5046	67.377	69.1789
AT1G12640	6.74852	23.2552	16.073	21.1756
AT1G12730	4.44197	6.81825	9.77472	6.97211
AT1G12750	13.9135	6.55589	22.9943	8.83781
AT1G12760	28.4108	55.4968	37.3651	52.4674
AT1G12845	34.412	34.3257	55.122	41.3814
AT1G12990	14.9391	23.0739	24.5603	22.3644
AT1G13000	6.82251	22.6493	15.6692	19.9881
AT1G13050	9.73511	6.28327	9.28751	5.50816
AT1G13210	8.59938	23.3272	14.149	18.6796
AT1G13380	32.0526	50.9624	55.0534	58.9812
AT1G13560	16.0904	48.3679	25.9265	52.4377
AT1G13580	2.90489	7.28297	7.46443	5.91436
AT1G13770	6.89672	10.4463	9.26162	8.32809
AT1G13900	2.07472	17.0645	4.11577	15.8424
AT1G14010	25.9902	56.1469	41.9346	66.6737
AT1G14040	3.17492	3.47038	3.68679	3.08071
AT1G14230	7.47826	7.05034	13.7723	10.0578
AT1G14270	102.446	101.138	82.6255	100.357
AT1G14290	46.6495	53.9778	69.7646	59.265
AT1G14345	270.21	218.523	259.499	245.594
AT1G14450	115.061	50.792	128.456	74.0755
AT1G14480	4.10034	4.24296	6.44062	3.14769
AT1G14530	3.58059	10.3332	6.86955	8.66555
AT1G14600	9.66619	9.04446	12.9681	7.41231
AT1G14670	21.5793	55.9882	36.7881	60.124
AT1G14700	27.8711	51.9236	46.5049	51.4853
AT1G14730	1.36494	6.10613	3.06605	5.65308
AT1G14970	3.7234	2.10927	9.10828	3.31966
AT1G15010	45.5325	21.9822	35.4272	23.9998
AT1G15020	7.43204	13.8927	19.7383	16.0624
AT1G15080	2.7192	8.51477	4.13451	8.99992
AT1G15110	4.31524	10.2925	6.96208	6.75073
AT1G15220	13.7411	7.14235	12.5455	9.9884
AT1G15490	6.63904	5.76738	8.64075	6.23224
AT1G15500	106.766	88.6159	143.035	97.4421
AT1G15530	8.27004	22.4355	11.9267	20.4274
AT1G15690	77.0858	226.914	137.921	216.72
AT1G15880	59.4386	34.2179	77.9477	41.3834
AT1G15900	9.58907	2.21083	11.9118	7.60851
AT1G15960	3.6957	3.06461	11.2776	3.3002
AT1G16000	88.0715	44.8809	92.6835	68.3167
AT1G16010	49.2819	30.1408	53.1854	34.7867
AT1G16110	3.23329	4.47215	6.07674	4.80126
AT1G16180	10.5494	88.0948	25.9063	87.1254
AT1G16240	112.3	81.7625	108.092	89.9261
AT1G16260	6.39067	10.1253	16.6881	12.4934
AT1G16390	8.038	22.0334	12.8572	21.7299
AT1G16400	1.97194	6.32843	3.64725	5.99908
AT1G16410	14.9345	83.7843	26.6529	83.2792
AT1G16560	15.0923	46.7491	28.9235	51.5052
AT1G16570	6.98003	11.0013	12.0665	11.2054
AT1G16630	3.60432	8.9089	3.88137	6.92225
AT1G16680	18.496	22.5954	19.3078	21.1882
AT1G16780	6.52273	10.669	8.52775	9.01779
AT1G16830	2.22734	1.44657	2.76478	2.47864
AT1G17080	109.582	78.5236	92.8548	93.5145
AT1G17120	10.3227	14.7551	18.3604	17.0066
AT1G17200	61.9976	77.9081	84.8553	91.0488
AT1G17230	3.25324	6.11302	4.13617	5.15143
AT1G17270	2.52881	4.68472	4.1633	4.98169
AT1G17280	71.3508	64.1112	57.1488	62.7318
AT1G17500	4.45809	9.83318	5.99082	7.9847
AT1G17530	58.9554	43.019	80.271	59.4896
AT1G17620	36.7341	115.018	51.0605	108.268
AT1G17700	12.7093	19.1062	12.285	17.6172
AT1G17870	3.46541	3.21213	4.84863	3.21342
AT1G18180	2.18011	10.1989	2.63144	8.77694
AT1G18190	21.3317	17.077	17.7405	15.3902
AT1G18265	7.00928	8.6163	12.9202	10.8554
AT1G18460	16.0264	33.4063	28.0533	31.8344
AT1G18470	8.35487	28.7963	17.1776	29.8554
AT1G18600	29.5101	32.4702	28.6012	32.7536
AT1G18610	14.8048	10.5742	16.9641	10.2443
AT1G18650	36.5608	84.8873	52.6567	81.8852
AT1G18690	3.79802	3.89087	6.32662	3.89784
AT1G18720	41.2471	113.752	52.4282	122.365
AT1G18740	36.4463	34.0423	37.5623	37.8547
AT1G19310	40.4907	21.9348	38.9522	27.5579
AT1G19360	4.70722	27.9156	12.0943	28.0489
AT1G19370	8.48623	20.8137	17.1708	20.8916
AT1G19380	21.7304	42.6539	41.7004	55.2495
AT1G19400	97.3063	64.0852	99.3911	75.1011
AT1G19430	3.68646	19.5851	4.60828	17.4121
AT1G19440	4.33857	17.0965	9.47188	17.7752
AT1G19450	12.5699	31.3786	15.425	30.8452
AT1G19620	1.97449	5.8755	6.07181	5.42239
AT1G19770	77.434	208.92	96.0991	203.326
AT1G19800	60.8698	53.1158	58.088	54.6443
AT1G19970	5.85265	11.0682	11.3656	9.15613
AT1G20050	39.8194	57.3123	79.1437	63.8542
AT1G20340	1810.69	1527.13	1358.74	1670.81
AT1G20510	49.2104	55.3547	54.0891	50.2273
AT1G20823	11.8992	35.9934	14.7118	34.6612
AT1G20830	56.6295	46.5741	48.2063	45.1802
AT1G20840	17.8328	42.5333	27.7189	41.2801
AT1G20980	27.6043	29.0273	26.8487	25.4957
AT1G21070	5.84284	11.2341	9.85809	13.7075
AT1G21090	4.05938	21.5409	6.68149	17.4756
AT1G21370	6.21702	13.2886	12.3448	12.2971
AT1G21460	6.7922	49.1984	15.9352	43.5163
AT1G21790	5.6354	12.1856	13.2191	15.8644
AT1G21880	9.20942	54.0387	13.5042	49.2546
AT1G21900	7.99654	30.5513	16.0399	33.4951
AT1G21920	23.4773	25.5298	41.5876	28.8125
AT1G22500	5.85732	10.6824	11.3973	13.2973
AT1G22510	24.802	16.1431	26.2303	19.4842
AT1G22540	10.5183	19.1067	12.7025	17.7958
AT1G22570	9.66624	23.2396	20.313	22.092
AT1G22610	31.9301	40.3554	30.7274	35.0261
AT1G22700	168.956	165.822	137.882	163.084
AT1G22710	21.1278	82.1093	32.268	81.0514
AT1G22750	10.8537	52.4178	22.2985	47.5223
AT1G22850	145.867	107.126	148.875	116.527
AT1G22882	14.061	26.6956	18.2989	25.383
AT1G23040	17.1923	22.0006	14.5369	22.456
AT1G23050	32.3117	19.1621	41.2732	27.7357
AT1G23080	21.1406	92.323	37.2416	83.9053
AT1G23090	14.1133	35.1804	21.7041	34.1751
AT1G23465	2.88518	2.47882	4.49926	2.45929
AT1G23480	10.2197	21.6866	23.3232	24.2442
AT1G23830	1.8607	6.77632	3.12027	5.71088
AT1G23840	1.25727	3.19255	3.2842	2.72771
AT1G23880	3.55078	8.63181	6.73179	7.98814
AT1G23980	6.34585	8.75536	8.50671	6.68785
AT1G24070	2.63227	3.46464	4.67923	3.19478
AT1G24150	3.87702	6.73211	5.86311	6.66754
AT1G24267	43.8174	42.8974	42.6138	40.5358
AT1G24350	40.7538	25.0766	50.3571	33.217
AT1G24400	1.54174	7.75615	3.31266	6.28007
AT1G25290	31.4323	24.7501	32.6867	23.8971
AT1G25320	1.73266	7.66569	3.40348	7.55608
AT1G25375	12.6675	15.7716	10.6328	11.2769
AT1G25390	9.69971	22.5107	17.5563	20.7638
AT1G25400	34.7709	66.0746	51.0226	67.5732
AT1G25480	5.22819	11.3363	10.1658	9.66188
AT1G25500	2.79496	4.1613	3.84016	3.69307
AT1G25530	2.19128	2.55958	5.05763	3.32466
AT1G26100	7.2413	9.68252	17.733	10.5666
AT1G26120	28.7276	29.8313	25.3807	27.4455
AT1G26130	4.06396	5.10375	4.6813	4.49892
AT1G26150	50.2644	31.4134	52.6268	27.711
AT1G26180	39.7781	25.0047	40.2378	28.2034
AT1G26190	13.9744	14.5437	14.3727	10.7048
AT1G26340	75.514	48.8056	58.9633	51.5275
AT1G26440	7.44482	9.10768	11.4646	9.70376
AT1G26650	16.7778	25.8292	23.409	25.4334
AT1G26670	65.4173	49.3569	108.7	60.9261
AT1G26730	1.83648	2.3989	2.52046	2.38899
AT1G26850	23.7736	117.332	45.6901	113.222
AT1G27000	70.265	67.7626	63.5403	72.2114
AT1G27190	13.5296	35.734	22.8764	35.4642
AT1G27200	7.41168	14.0263	13.8333	13.6437
AT1G27290	132.456	99.9496	139.869	121.198
AT1G27300	49.7937	32.563	58.8769	39.6764
AT1G27320	22.4021	43.2688	23.7116	36.1012
AT1G27390	72.3086	64.3401	57.9414	58.4393
AT1G27600	19.6106	38.2322	28.6665	36.8025
AT1G27695	39.6077	15.2578	42.2604	24.5629
AT1G27700	23.677	17.9193	24.7262	18.3812
AT1G27770	16.1606	21.1433	27.1647	21.0914
AT1G27950	155.103	315.198	191.645	340.629
AT1G28010	3.47257	6.58196	6.00911	6.17929
AT1G28140	127.076	110.301	125.67	113.204
AT1G28230	1.99855	12.1063	4.29351	13.7654
AT1G28240	12.9723	25.4655	16.5159	26.0093
AT1G28250	35.0015	26.1524	52.7521	36.9169
AT1G28340	9.8545	43.4835	18.4994	38.9559
AT1G28440	8.34149	33.24	13.8492	29.9162
AT1G28490	75.8755	58.7295	62.3225	54.0952
AT1G28760	1.94967	5.0774	2.68068	5.49241
AT1G29330	4.72947	12.3594	9.97477	13.4454
AT1G29470	25.5437	92.5001	43.1993	86.6736
AT1G29520	16.8033	37.729	23.8188	32.8414
AT1G29750	4.36749	11.0986	6.08917	9.58544
AT1G29760	10.5742	14.3842	15.3419	15.0892
AT1G29890	7.35326	33.6295	12.8635	27.9982
AT1G29970	60.8005	37.5303	69.4733	52.9552
AT1G29980	4.51837	25.276	8.41554	23.5357
AT1G30000	5.61744	14.0618	8.67911	14.0276
AT1G30130	13.767	40.5964	21.3872	41.3124
AT1G30360	50.8653	154.185	77.2005	147.701
AT1G30380	1359.93	926.309	1270.05	1168.54
AT1G30400	9.48245	34.0207	15.2811	28.0106
AT1G30450	8.02833	17.5528	10.2828	15.4338
AT1G30515	3.64537	2.3529	4.57501	2.94638
AT1G30520	34.0765	25.4711	42.1933	28.7411
AT1G30570	5.96016	15.051	8.10424	14.5332
AT1G30845	13.1684	8.65778	12.6756	12.5384
AT1G30890	20.3939	32.7039	24.5691	30.5051
AT1G31120	4.38223	8.29819	7.06297	7.01077
AT1G31300	36.2243	38.9827	42.2233	42.8854
AT1G31330	1551.18	1268.92	1330.75	1439.9
AT1G31420	48.5177	83.0363	67.1331	88.0252
AT1G31770	5.64738	7.95278	8.05359	7.47262
AT1G31820	1.58908	5.31208	2.96799	4.25327
AT1G31830	6.50973	14.9192	12.452	18.04
AT1G31850	16.3278	49.4507	31.1104	46.8028
AT1G32050	76.682	87.509	102.554	99.9341
AT1G32080	202.463	207.84	178.231	207.798
AT1G32090	4.7892	22.2793	7.4339	19.6404
AT1G32100	38.321	37.8406	26.3904	32.9764
AT1G32210	55.1734	41.4588	69.0676	59.7056
AT1G32350	2.91945	2.86499	3.46508	3.23628
AT1G32400	27.1102	109.205	56.9704	99.7512
AT1G32410	32.3552	62.3602	39.1215	68.044
AT1G32450	3.73972	5.98129	8.99596	5.72196
AT1G32540	31.4284	12.6492	39.5437	20.3204
AT1G32860	3.72215	14.0449	6.7008	15.7259
AT1G32870	12.521	15.7138	9.49404	12.1466
AT1G33060	17.4436	17.2407	17.0156	14.8063
AT1G33110	24.1518	21.6037	41.9282	25.8808
AT1G33170	9.34429	32.3808	14.5134	27.5543
AT1G33230	18.0335	30.2742	24.1354	30.1413
AT1G33250	17.7884	13.2959	26.1096	17.0722
AT1G33265	58.3075	28.8754	55.3414	40.342
AT1G33490	29.7465	47.9328	40.9126	49.1847
AT1G34020	7.27139	18.8593	14.9255	21.1497
AT1G34065	8.68057	6.29551	9.22313	5.55514
AT1G34110	9.4497	6.53935	10.4226	6.83091
AT1G34130	5.85092	30.6873	9.00216	28.9354
AT1G34190	48.4801	37.3458	56.8928	40.1699
AT1G34300	6.08568	13.4716	13.8629	12.758
AT1G34340	9.2749	8.3267	16.6684	8.61228
AT1G34350	19.2852	35.9538	24.8759	35.2388
AT1G34470	8.24699	8.61586	13.2495	9.09757
AT1G34550	9.92465	26.4078	16.4572	25.3035
AT1G34640	16.4968	25.6779	19.265	27.7076
AT1G34780	7.07019	17.4227	20.4049	19.2454
AT1G35230	12.4407	10.6481	6.54576	14.823
AT1G35510	9.60479	16.4076	15.0346	18.1695
AT1G35620	11.6244	48.6404	24.4022	48.3552
AT1G35710	10.6755	7.52704	12.8737	7.51448
AT1G36980	111.971	93.4043	137.381	116.527
AT1G42470	3.22001	8.17904	4.22347	5.26246
AT1G42540	4.60567	11.8111	9.65453	12.1058
AT1G42960	310.131	245.856	265.216	261.394
AT1G42990	51.0425	50.1703	55.1152	58.6403
AT1G43130	10.573	21.7559	23.5786	27.244
AT1G43580	11.692	35.2509	30.8512	35.8845
AT1G43650	3.85277	4.38398	3.65465	5.02953
AT1G43790	30.1165	24.0878	33.1102	33.0771
AT1G43900	75.7172	53.4511	75.7634	59.5379
AT1G44100	8.44905	16.0607	16.5322	17.2148
AT1G44750	16.5593	18.4806	27.6827	20.2251
AT1G44800	6.92062	25.9248	18.9294	28.0695
AT1G44890	12.8128	9.57716	12.5936	7.57964
AT1G44920	175.348	142.63	159.87	152.467
AT1G44960	3.29322	13.2363	9.35706	15.4489
AT1G47290	28.5731	27.3331	26.2574	23.8097
AT1G47530	49.7628	76.7835	71.1642	77.8285
AT1G47670	6.40473	14.5215	9.16457	13.709
AT1G48230	16.154	24.1989	29.6334	27.4652
AT1G48270	2.27101	10.896	3.67989	11.8443
AT1G48380	27.6018	19.6866	20.9784	20.6045
AT1G48440	75.7389	115.103	105.693	133.249
AT1G48460	33.5029	27.4909	24.81	28.5367
AT1G48480	11.7155	58.7505	22.2456	53.9524
AT1G48880	3.60118	3.55835	6.69664	4.95871
AT1G49050	6.16958	10.0706	10.371	9.18229
AT1G49230	14.5721	16.9357	17.8109	22.7832
AT1G49380	54.6094	54.7172	44.7602	51.0314
AT1G49410	102.533	29.5948	134.402	66.3323
AT1G49470	1.9226	15.3862	4.15085	13.3057
AT1G49510	59.9044	44.6581	66.7684	45.8794
AT1G50260	13.059	7.7991	11.6167	7.50613
AT1G50430	26.4233	80.4261	42.172	75.8041
AT1G50440	36.411	16.0111	43.2757	22.7276
AT1G50460	26.3211	23.0105	26.184	21.6625
AT1G50630	3.60677	7.73063	6.01309	6.81619
AT1G50740	26.8483	19.2368	56.5678	32.0034
AT1G51340	8.96822	8.7307	10.752	8.45117
AT1G51460	1.986	6.54832	3.90797	5.85278
AT1G51500	46.1122	77.3935	62.0691	76.8831
AT1G51570	73.5481	91.2046	64.6919	84.3987
AT1G51590	6.90212	29.8824	15.7127	25.8631
AT1G51610	31.0261	31.2843	31.0609	29.4408
AT1G51740	27.9889	20.2547	24.8797	22.428
AT1G51805	17.2951	56.5386	31.9475	45.3797
AT1G51940	12.5103	38.6347	25.6597	37.037
AT1G52190	14.5112	40.7827	23.2992	37.6944
AT1G52200	36.4729	22.7881	35.8332	30.3622
AT1G52220	395.434	288.49	353.509	321.401
AT1G52290	8.0128	15.1484	16.5478	17.0779
AT1G52310	7.62226	18.002	18.3318	19.8864
AT1G52420	11.5594	24.0422	19.0045	22.9253
AT1G52550	54.3413	26.1111	45.1806	36.3585
AT1G52750	1.72998	6.7275	3.16361	6.79663
AT1G52780	1.55811	9.56474	2.37055	7.99899
AT1G52910	8.33743	18.8365	15.2413	19.686
AT1G53040	8.67997	16.1677	16.0567	16.7431
AT1G53110	9.13436	4.81388	9.09164	5.44756
AT1G53210	21.5738	130.786	46.9626	127.831
AT1G53390	4.46933	15.4975	8.53446	12.3753
AT1G53560	104.18	56.8221	110.996	76.2512
AT1G53730	9.29315	31.8246	14.2838	26.4107
AT1G53760	32.7055	22.0725	31.0577	26.3683
AT1G53770	5.90219	13.5341	12.0166	15.6693
AT1G54150	24.4938	20.7829	28.1444	20.5716
AT1G54217	10.0688	4.80506	8.07875	6.55189
AT1G54320	23.824	69.865	40.6344	67.5558
AT1G54385	8.98887	10.4609	8.42279	9.53738
AT1G54500	316.177	200.081	329.139	250.173
AT1G54520	183.608	182.133	159.394	179.805
AT1G54990	4.16575	32.4194	9.85902	30.4457
AT1G55160	96.4161	60.2114	96.2699	82.8923
AT1G55190	23.1711	29.702	30.8012	39.9004
AT1G55280	12.0214	10.4879	13.4996	9.35965
AT1G55350	9.02682	17.6092	9.11646	13.5601
AT1G55535	11.436	14.8791	19.9294	16.4558
AT1G55620	8.39468	13.6682	12.5644	11.8571
AT1G55670	1134.81	940.134	1000.17	1150.99
AT1G55850	32.7847	58.6294	49.2367	52.3555
AT1G55960	23.2627	46.52	35.7983	50.5247
AT1G56140	4.43432	10.2214	7.92674	8.09843
AT1G56145	2.95116	3.573	4.28989	2.95583
AT1G56200	250.014	156.468	300.32	188.307
AT1G56610	10.5547	8.8777	8.77941	7.88752
AT1G56720	14.3994	28.4072	15.5287	22.922
AT1G57540	49.993	17.5625	52.9063	39.1052
AT1G57600	2.36658	9.44446	3.91506	7.83503
AT1G57610	38.2655	24.6925	50.8662	29.1553
AT1G57620	12.8472	43.5463	20.6238	47.3384
AT1G57680	104.609	65.0281	124.706	79.5682
AT1G58030	22.2732	33.077	36.6238	32.1162
AT1G58270	11.197	80.6337	33.55	76.4124
AT1G58340	3.79618	4.89568	6.41981	5.73829
AT1G58360	8.8584	48.1075	17.9579	43.5765
AT1G58440	7.48796	42.3338	17.5506	37.7502
AT1G59510	3.89895	4.2228	7.26463	4.05523
AT1G59560	8.42888	8.39202	7.6516	8.07799
AT1G59590	25.4176	28.297	28.0239	27.0698
AT1G59870	67.0608	138.144	80.6089	119.73
AT1G60160	8.01947	19.1804	14.1791	17.1794
AT1G60460	2.3535	2.14516	2.61549	2.58206
AT1G60600	62.7319	48.0491	53.9248	47.2364
AT1G60790	3.09094	16.3398	8.22073	15.326
AT1G60800	32.3754	48.1991	42.3538	48.9784
AT1G60960	6.41046	10.803	13.764	10.769
AT1G61065	3.02139	7.19473	6.9389	8.47015
AT1G61250	28.5958	65.4737	42.7701	68.1556
AT1G61260	7.9088	11.8864	12.3111	11.5237
AT1G61280	2.86272	3.49156	6.5392	6.55859
AT1G61360	2.29164	3.39216	2.91533	2.89612
AT1G61380	5.29001	11.8724	8.49434	11.9047
AT1G61670	5.94522	26.3063	12.4619	27.888
AT1G61740	36.6826	112.495	75.321	115.131
AT1G61760	2.40151	7.10779	2.55191	4.92118
AT1G61770	17.9902	47.4908	45.2932	51.2362
AT1G61790	29.7866	65.4907	68.19	68.7885
AT1G61800	4.1568	5.11342	2.69303	4.13709
AT1G61890	12.3444	33.9167	26.52	29.9053
AT1G62200	6.10917	17.0658	14.3827	18.035
AT1G62330	8.7713	21.7239	15.415	19.3252
AT1G62430	12.5937	37.0337	15.7135	35.9416
AT1G62500	3.03177	27.4837	6.55986	26.317
AT1G62660	5.14805	18.5985	9.67048	16.578
AT1G62680	4.59108	3.70722	4.91989	3.85238
AT1G62790	18.0912	57.1929	27.0324	64.3147
AT1G62880	7.29261	17.8221	18.1272	18.9887
AT1G62950	3.50355	3.23249	4.13664	2.77309
AT1G62960	50.8632	39.0811	66.5848	45.8363
AT1G63010	15.8307	29.2858	18.4436	25.1508
AT1G63110	10.5078	15.8734	22.5674	20.5794
AT1G63120	8.74749	27.3773	17.2491	28.1658
AT1G63170	15.4107	33.8017	23.3485	31.9327
AT1G63260	6.61139	27.3289	20.0969	23.7954
AT1G63420	10.3189	10.3976	15.1999	10.6118
AT1G63430	5.47952	17.1546	9.84092	15.2977
AT1G63690	22.35	50.5797	42.3475	49.0311
AT1G63830	74.3736	61.4157	74.9221	61.5302
AT1G64060	3.5553	4.46241	4.93718	3.77464
AT1G64065	2.50895	7.66094	4.60743	7.46573
AT1G64090	32.2595	66.5989	71.2996	71.5011
AT1G64150	74.1429	71.8412	55.7016	65.6621
AT1G64355	130.01	79.6662	126.543	93.0305
AT1G64385	11.416	24.6372	19.5525	28.4655
AT1G64450	5.82068	26.6008	8.59475	24.284
AT1G64650	6.61287	50.925	12.6489	46.5962
AT1G64670	12.6464	27.6162	20.4701	29.6964
AT1G64760	7.00033	22.5876	16.9885	22.7362
AT1G64780	5.28922	26.4686	8.64487	26.3735
AT1G64890	1.77172	6.33519	2.78551	6.77277
AT1G65040	9.4597	16.6549	22.2502	17.2645
AT1G65080	5.58481	5.08137	4.12428	3.86101
AT1G65230	158.417	105.376	158.22	132.692
AT1G65380	2.17688	8.41387	3.0084	6.88167
AT1G65420	25.2154	14.6	31.8398	18.1142
AT1G65720	51.6946	105.382	100.494	128.955
AT1G65800	10.6768	27.979	16.9398	22.6804
AT1G65820	36.9289	103.299	55.1741	124.998
AT1G65985	4.67496	4.14554	4.84504	4.48779
AT1G66150	13.795	58.1774	25.1673	57.355
AT1G66340	4.80475	12.2813	9.66849	11.7233
AT1G66760	5.78846	22.6224	11.3031	18.0503
AT1G66820	162.345	72.7572	169.229	122.93
AT1G66880	5.47585	7.75449	8.79369	8.80608
AT1G66910	4.19188	11.9879	9.89946	12.8302
AT1G66940	27.1364	74.6538	50.7761	75.9647
AT1G67060	8.89257	13.5887	22.0954	14.1284
AT1G67080	76.1184	44.9928	83.0526	51.7598
AT1G67300	9.60729	17.5324	15.2708	12.5487
AT1G67350	154.164	78.695	164.964	118.996
AT1G67490	5.7049	12.3689	8.12447	9.20518
AT1G67570	1.78803	2.32758	3.12759	2.36936
AT1G67720	3.19882	9.33586	6.1225	7.82983
AT1G67740	887.293	839.038	663.746	815.955
AT1G67850	3.96317	10.5572	7.41926	9.56663
AT1G67880	9.13454	15.0986	20.1464	17.3382
AT1G67960	8.13547	9.03158	10.0097	8.00783
AT1G68070	5.55929	26.6283	10.279	24.4716
AT1G68100	5.77975	21.2132	13.8437	19.1338
AT1G68220	19.6644	51.8968	35.0788	56.8874
AT1G68400	5.72792	35.3443	11.1781	29.7305
AT1G68440	45.4007	82.7317	58.909	81.3806
AT1G68470	2.7591	5.72363	4.78169	5.12257
AT1G68530	52.1668	222.097	104.912	211.772
AT1G68570	16.8319	46.3132	25.0624	39.5129
AT1G68600	4.55671	21.1335	9.73963	19.35
AT1G68650	2.40319	8.67552	4.54337	7.14798
AT1G68680	58.7243	20.3365	63.7293	38.186
AT1G68710	2.90654	5.66157	3.98436	4.01784
AT1G68740	3.33547	5.12818	4.41527	4.03374
AT1G68820	2.78771	12.2763	6.14539	9.23475
AT1G68910	29.2232	32.7525	24.651	26.1682
AT1G69330	20.618	9.99381	27.1387	13.4703
AT1G69420	24.4895	54.0326	38.7281	52.9865
AT1G69450	2.50162	9.22994	4.60867	7.66889
AT1G69460	34.7805	84.8298	55.157	98.3604
AT1G69640	18.3266	50.4497	24.6957	51.4882
AT1G69700	35.7273	56.261	76.8539	58.542
AT1G69730	3.60422	13.4943	7.01398	12.804
AT1G69850	26.0941	34.4399	48.8122	36.5201
AT1G69870	32.3972	61.65	42.4161	61.8792
AT1G69910	8.75375	16.4167	12.6616	16.6719
AT1G69935	86.1944	47.4505	88.9993	62.9024
AT1G69980	18.3762	41.4513	32.4044	44.6123
AT1G70020	6.47077	2.18153	6.98249	2.12582
AT1G70230	5.16033	16.2084	10.7375	18.8451
AT1G70260	0.675982	4.56804	3.05722	4.04676
AT1G70280	17.4573	49.1842	37.7254	42.7846
AT1G70300	3.54311	8.80927	6.80056	8.0329
AT1G70330	4.82833	40.2517	12.1363	38.5562
AT1G70470	8.20601	17.9615	12.8112	17.2333
AT1G70520	6.90532	24.466	13.6581	22.25
AT1G70610	23.734	26.4063	21.0753	23.412
AT1G70690	1.40881	8.27958	2.88578	8.0853
AT1G70760	398.266	251.204	418.803	287.656
AT1G70940	26.656	81.3635	50.0991	73.2626
AT1G70985	9.12764	15.3595	15.1363	19.1788
AT1G70990	2.57115	2.3731	1.51022	1.66459
AT1G71090	5.23944	21.9066	9.33541	21.9617
AT1G71110	3.03095	3.20937	7.54877	5.17105
AT1G71140	0.904346	7.10727	2.62892	4.79117
AT1G71170	25.5031	19.368	23.9655	20.5097
AT1G71696	7.46129	8.45145	16.2107	9.61349
AT1G71780	39.2719	18.9488	37.2337	26.6078
AT1G71870	1.74697	3.77088	3.57206	3.80467
AT1G71900	9.47223	24.5461	19.1885	23.1767
AT1G71940	9.32498	10.3669	13.9022	11.8538
AT1G71980	29.1679	33.3935	33.4725	35.8298
AT1G72020	234.974	139.914	228.596	185.149
AT1G72090	44.1521	42.206	31.191	37.1026
AT1G72130	14.0943	17.3145	24.5926	19.3185
AT1G72230	3.63025	11.0627	5.7648	11.9241
AT1G72280	1.40527	3.60682	3.06755	4.05769
AT1G72300	3.76368	9.8362	5.37505	8.97989
AT1G72310	9.59518	10.8358	12.8642	12.1979
AT1G72480	3.49866	26.2727	7.10885	26.0792
AT1G72600	3.36191	7.24376	8.41467	6.93803
AT1G72700	4.34334	9.25764	5.66895	7.43918
AT1G72790	8.65622	18.7211	15.093	16.6258
AT1G72820	48.1449	30.6549	55.0763	36.5908
AT1G73080	5.31098	14.5409	9.09224	13.8919
AT1G73240	1.94293	10.3316	3.91236	10.6228
AT1G73480	11.2069	20.6142	22.1868	22.6769
AT1G73590	1.90828	12.4407	3.72615	10.4568
AT1G73650	13.3255	61.0179	24.9184	61.9412
AT1G73885	440.861	296.616	510.654	365.061
AT1G73890	16.6634	7.21509	20.3343	8.16494
AT1G73980	23.5786	21.6582	23.9182	19.3297
AT1G74055	5.51912	9.41146	9.4824	6.77374
AT1G74170	6.82882	3.50554	8.18881	3.647
AT1G74180	4.35947	2.02151	4.54759	1.97028
AT1G74240	13.3734	10.5282	11.9031	8.40026
AT1G74290	1.99692	3.14361	3.32663	2.65618
AT1G74370	51.3259	22.0532	70.7058	35.4834
AT1G74380	20.7215	50.982	31.5566	53.8556
AT1G74410	17.5047	12.3353	20.2592	14.5075
AT1G74450	28.1082	24.8896	33.304	24.818
AT1G74520	41.6816	77.2827	69.5818	74.2343
AT1G74720	19.3111	15.7444	19.5832	16.557
AT1G74780	2.9198	4.60471	5.85508	4.96924
AT1G74800	4.11338	14.6473	7.27816	10.7006
AT1G75000	5.40989	9.66592	4.86196	9.34522
AT1G75020	14.3506	18.6092	28.7793	19.573
AT1G75140	6.72113	17.871	12.6652	19.474
AT1G75180	60.6883	37.2821	66.4115	45.0859
AT1G75220	13.6206	59.4941	23.7334	51.2514
AT1G75360	2.90349	2.24244	5.75126	3.35206
AT1G75500	35.8076	124.461	60.5709	117.338
AT1G75630	66.5501	61.8246	112.362	85.6443
AT1G75690	344.919	210.12	325.187	277.497
AT1G75810	12.6181	22.5626	21.7566	28.0019
AT1G75820	8.96704	34.5544	13.7257	30.3249
AT1G76100	451.137	338.461	382.169	379.627
AT1G76340	11.8427	22.9574	19.4598	20.9992
AT1G76400	13.7033	37.6435	22.6177	35.1479
AT1G76520	19.5043	53.2686	35.5616	45.0336
AT1G76670	55.6718	56.2395	76.7584	67.7821
AT1G76800	21.6988	14.9509	17.4833	17.6451
AT1G77210	9.70455	30.105	27.4394	30.3938
AT1G77220	6.50741	13.3014	14.6331	13.9123
AT1G77350	18.7354	28.7293	25.1557	35.7253
AT1G77610	21.5184	34.8951	27.5507	37.3581
AT1G77660	5.77923	6.22712	11.6801	7.11012
AT1G77690	3.08233	12.0829	5.23007	10.5432
AT1G77855	5.42129	6.51223	6.19057	6.42646
AT1G77990	6.7061	14.7505	9.42769	11.767
AT1G78000	2.80969	4.25489	5.73026	3.90224
AT1G78240	16.0141	33.465	28.7917	33.4546
AT1G78560	32.4742	29.554	37.9948	27.8531
AT1G78610	7.52036	16.615	9.32021	14.4977
AT1G78620	39.5758	45.7897	35.8412	42.5093
AT1G78895	19.4278	24.6993	35.1238	24.9169
AT1G78915	61.9308	62.9819	51.959	57.4906
AT1G78920	12.4641	42.7366	18.9453	36.7233
AT1G79040	2440.1	1606.77	2045.54	1934.3
AT1G79170	59.8788	18.8672	59.196	23.628
AT1G79410	4.49937	10.9426	5.85062	11.2008
AT1G79590	58.9602	40.9555	54.2142	48.5534
AT1G79670	14.1848	12.6286	23.0124	15.1487
AT1G79710	2.08815	5.18157	5.01829	5.00691
AT1G79760	4.1314	2.45417	3.52139	2.87083
AT1G80080	5.86042	26.1661	10.2822	25.989
AT1G80280	16.4718	21.1932	23.4159	21.9339
AT1G80310	10.1331	27.4433	16.5902	26.7391
AT1G80400	11.9991	17.9485	17.9839	19.5767
AT1G80510	2.75223	10.3033	6.0199	10.2401
AT1G80530	9.23033	22.8424	19.0154	20.8269
AT1G80640	25.0634	32.1899	32.7152	35.9284
AT1G80760	13.747	32.7546	19.9621	31.2833
AT1G80860	21.85	46.5477	50.2418	51.6435
AT1G80870	7.33277	14.4147	9.25212	15.482
AT1G80890	49.7054	24.721	48.6747	34.276
AT1G80950	20.2098	39.6634	27.7826	38.6218
AT2G01070	11.3997	24.7286	20.9294	24.3633
AT2G01080	14.8093	12.3459	28.3659	17.0417
AT2G01110	126.985	111.913	116.087	116.184
AT2G01170	13.43	24.9822	26.4767	22.9119
AT2G01180	22.5761	33.9018	35.6825	34.9915
AT2G01270	18.921	23.8196	31.5166	27.386
AT2G01275	2.55361	2.10507	2.22119	2.23118
AT2G01320	33.9498	38.0972	42.1005	39.3069
AT2G01420	19.7691	72.5361	34.9106	70.8278
AT2G01470	48.447	42.0512	37.3899	41.0794
AT2G01505	24.3839	12.924	32.5516	17.505
AT2G01590	104.461	55.289	135.443	75.8888
AT2G01660	2.4071	8.89335	4.84006	9.72264
AT2G01680	30.7627	36.3189	31.8465	32.9252
AT2G01720	10.8775	56.254	22.8417	59.825
AT2G01735	6.58375	13.0676	8.20966	12.7826
AT2G01820	11.5652	61.6083	18.8527	58.2546
AT2G01830	3.11476	8.25778	4.9163	7.02878
AT2G01950	2.20638	9.34854	4.14334	7.93322
AT2G01980	1.22014	5.87791	3.47208	4.65907
AT2G02020	7.39505	4.60908	12.8229	4.99136
AT2G02040	12.8285	38.944	17.0582	38.1381
AT2G02180	19.26	44.2027	33.3729	44.9225
AT2G02220	3.91056	11.5195	6.07139	10.3479
AT2G02370	3.96031	8.70012	8.69852	9.11205
AT2G02590	18.355	16.5916	15.1875	18.6441
AT2G02780	2.59435	18.0271	6.24447	14.8693
AT2G02860	7.58375	16.8571	14.2261	13.3707
AT2G02910	3.83707	7.87887	10.4529	8.31487
AT2G02960	31.7767	15.2257	39.2249	19.5859
AT2G02970	11.5551	17.887	21.9799	19.7893
AT2G03120	21.0596	68.4211	43.5093	66.8703
AT2G03140	11.4332	11.6414	9.44561	9.53588
AT2G03220	3.79559	11.5938	10.4238	13.3888
AT2G03310	106.853	72.4365	98.7557	82.3833
AT2G03510	5.0837	39.3211	8.65719	37.5224
AT2G03530	7.81523	11.9166	16.8721	13.727
AT2G03620	21.5237	14.4343	18.1105	15.6657
AT2G04032	0.747776	8.43205	2.58321	8.17995
AT2G04305	17.7966	14.7093	20.7314	15.5184
AT2G04350	4.56628	30.0429	7.81739	25.9131
AT2G04360	88.3903	86.1946	77.9908	80.2058
AT2G04620	2.62323	8.04148	3.42234	8.61491
AT2G04850	8.29438	17.1068	8.17899	15.9353
AT2G04900	133.982	56.1733	138.594	83.0001
AT2G05310	380.926	192.881	380.173	254.686
AT2G05320	4.73536	16.1472	6.0218	14.5204
AT2G05760	1.67521	5.5874	4.24012	5.91557
AT2G06005	4.54609	3.74207	6.01146	4.37452
AT2G07680	3.42156	4.00226	3.43463	2.94394
AT2G12400	3.26517	17.8683	8.09159	18.1273
AT2G13100	16.7125	19.2991	26.1032	22.8294
AT2G13610	17.1732	25.4941	20.2282	24.9191
AT2G13650	13.1439	20.9283	19.3358	21.3989
AT2G13790	6.01533	12.0485	10.5652	11.6515
AT2G13800	3.13657	2.85024	5.33808	3.99158
AT2G14255	16.1344	9.73161	22.421	10.1303
AT2G14720	7.45973	40.5856	11.2587	36.6681
AT2G14835	52.3767	35.2569	52.3155	38.5966
AT2G15080	6.84174	8.85841	7.59714	7.81885
AT2G15090	26.9941	122.866	51.2285	117.604
AT2G15240	23.8472	28.0585	38.6625	29.8622
AT2G15280	20.6911	28.0685	40.3036	28.4226
AT2G15290	204.77	178.053	167.778	189.614
AT2G15300	4.19307	2.2059	5.87137	2.46768
AT2G15440	2.76413	9.76076	3.43241	6.81284
AT2G16250	3.06874	6.55776	5.90113	6.93175
AT2G16270	2.56859	7.93364	3.20865	6.5229
AT2G16280	31.1016	99.1696	52.0889	95.8448
AT2G16510	69.4634	127.793	84.5216	142.587
AT2G16660	19.7783	72.121	33.3321	71.8584
AT2G16800	64.8246	60.2302	62.5253	58.9072
AT2G17370	3.50723	9.71827	5.11981	9.86126
AT2G17450	44.7479	64.1628	71.5574	76.571
AT2G17480	4.5904	17.9476	9.33121	18.2512
AT2G17760	3.65682	19.5747	7.57352	19.9228
AT2G17820	6.59583	14.7334	8.66899	11.6837
AT2G17972	139.505	99.659	127.002	114.563
AT2G18240	7.28958	11.838	9.43189	10.3711
AT2G18630	30.3695	23.9443	35.4201	25.5386
AT2G18650	1.69613	6.47163	2.67756	4.66732
AT2G18670	12.6907	13.5997	18.4329	16.3253
AT2G18690	2.15204	10.5215	3.7142	8.95245
AT2G18710	95.08	87.4999	97.3804	90.9949
AT2G18770	10.909	26.739	17.7386	27.1081
AT2G18840	22.0443	25.3604	26.1483	28.8039
AT2G18860	32.0797	27.0101	35.1135	26.465
AT2G18950	32.6547	35.8621	28.4768	32.2243
AT2G18960	75.5428	148.293	101.541	140.924
AT2G19080	60.8894	55.6842	55.8364	49.008
AT2G19110	6.25752	11.5189	7.03874	9.96109
AT2G19340	11.1234	12.7545	15.9244	15.0002
AT2G19350	24.7947	15.2311	24.5239	19.8496
AT2G19450	9.00696	18.4515	10.5431	19.0803
AT2G19530	6.69313	7.54817	9.20522	6.93325
AT2G19580	1.85744	7.26606	2.61877	7.0311
AT2G19600	4.74779	11.3692	9.08762	10.1366
AT2G19780	3.7352	8.00008	4.64284	7.28578
AT2G19880	15.2885	31.4873	27.5928	29.228
AT2G19950	28.6339	27.8049	22.7702	23.7744
AT2G20120	21.3815	32.258	29.707	28.4889
AT2G20130	9.75442	21.796	14.1364	19.8867
AT2G20142	5.47322	2.47447	7.57089	4.37419
AT2G20230	19.5999	91.8485	39.5463	94.8061
AT2G20300	7.38503	17.1892	11.3784	14.892
AT2G20370	9.09254	21.1107	12.718	20.562
AT2G20590	4.82194	7.00565	5.49313	5.78808
AT2G20650	2.91637	4.10337	4.71666	3.48843
AT2G20725	45.8861	21.8324	76.0578	32.4305
AT2G20740	13.9818	60.7084	36.6226	49.3285
AT2G20850	9.45488	12.7246	13.4834	9.79275
AT2G20920	155.115	138.819	134.634	134.342
AT2G20940	31.0503	12.1921	32.0272	24.3802
AT2G21080	12.7616	17.1165	19.6388	17.6789
AT2G21120	20.7814	37.3148	43.3986	37.9497
AT2G21160	34.506	134.379	68.688	137.432
AT2G21180	11.264	10.368	18.3086	18.6722
AT2G21185	4.28412	0.839456	6.14044	4.34536
AT2G21340	55.0546	48.1924	55.31	50.5649
AT2G21410	16.4023	32.1728	21.2766	31.5787
AT2G21560	7.67375	19.3649	12.8368	15.471
AT2G21600	46.877	88.1478	62.3771	90.0044
AT2G21960	140.139	115.168	133.635	121.287
AT2G21970	187.604	141.507	178.73	167.042
AT2G22120	10.9807	16.025	15.9573	16.5094
AT2G22330	21.2998	19.7781	41.4132	26.7163
AT2G22530	2.68394	4.64333	4.02237	3.1626
AT2G23130	65.0565	141.432	100.678	154.296
AT2G23200	6.9559	15.7834	9.75342	14.8356
AT2G23310	25.8522	34.2536	43.2054	46.3608
AT2G23450	6.54204	13.3277	12.3947	14.54
AT2G23680	4.05023	10.2488	14.5299	11.0506
AT2G23770	4.56638	10.7963	4.95402	10.318
AT2G23780	54.7731	28.108	59.5502	40.9896
AT2G23810	40.5028	100.989	87.8082	100.152
AT2G23950	4.26885	12.9708	9.0393	10.7339
AT2G23980	11.0153	25.0495	20.9873	23.2452
AT2G24040	86.342	48.9386	92.4088	60.0458
AT2G24150	44.3816	64.9913	72.9543	70.6238
AT2G24220	1.58614	9.18682	3.554	10.0578
AT2G24230	3.67682	9.91527	4.5727	8.71221
AT2G24330	11.0473	22.9072	18.4348	21.3139
AT2G24420	16.3672	74.1489	29.3541	70.7458
AT2G24550	125.276	106.774	129.768	107.941
AT2G24600	19.8014	18.6471	30.4823	19.4383
AT2G24762	33.7335	55.7063	49.2188	61.1614
AT2G24820	90.1035	100.901	79.2424	98.6876
AT2G25220	1.51728	10.1282	4.04485	8.0047
AT2G25270	2.20125	14.1281	5.48247	11.8038
AT2G25310	15.5332	38.5328	34.4042	47.3225
AT2G25510	264.584	276.586	326.093	342.516
AT2G25520	32.7881	46.5278	69.6626	53.1246
AT2G25610	20.0126	42.6609	31.8115	52.3521
AT2G25660	11.4019	10.3085	8.29591	7.37508
AT2G25790	3.63251	8.23411	4.33642	7.64209
AT2G26070	21.9385	14.1382	23.2545	16.9218
AT2G26100	6.32135	13.2919	10.3574	13.536
AT2G26110	18.5924	54.5425	27.4411	49.8332
AT2G26170	6.92398	14.0882	11.1301	13.2107
AT2G26240	115.074	67.6232	125.756	87.358
AT2G26250	56.28	154.796	96.4612	146.764
AT2G26330	13.8541	41.0857	25.4756	41.1397
AT2G26500	861.549	541.911	927.934	674.737
AT2G26520	3.26118	3.15828	8.40776	5.44176
AT2G26680	6.87139	41.4345	14.3257	40.6184
AT2G26690	17.7905	53.1914	31.7088	46.2213
AT2G26730	15.7425	39.2187	26.2324	38.205
AT2G26840	50.6288	28.8443	42.0894	33.7777
AT2G26910	20.3604	43.8511	24.6592	36.5063
AT2G26975	117.694	112.044	148.309	144.212
AT2G27060	5.01316	13.4726	6.83201	12.0287
AT2G27130	6.41955	15.5086	13.4658	19.8078
AT2G27140	42.078	32.5941	29.0399	36.8509
AT2G27260	21.4323	57.3659	25.0107	58.5145
AT2G27310	17.6261	13.7264	21.898	16.6323
AT2G27500	24.1625	26.7825	55.0591	32.9027
AT2G27730	308.419	217.199	273.075	240.639
AT2G28070	11.8345	13.9264	20.3849	12.0991
AT2G28110	1.31917	3.85944	3.2471	3.54488
AT2G28120	2.24653	7.05073	4.16533	7.71594
AT2G28250	2.04806	5.6788	4.54072	4.5111
AT2G28260	2.64841	5.3518	7.36504	5.70919
AT2G28370	50.8429	33.9171	70.0559	44.6176
AT2G28440	4.62972	4.35865	6.50959	3.74143
AT2G28520	10.2497	16.5697	10.9069	15.8907
AT2G28580	4.88699	3.85179	3.69376	2.88241
AT2G28670	6.17474	5.88117	8.42344	6.52805
AT2G28800	247.58	216.915	284.313	227.529
AT2G29020	54.3966	44.4382	72.1911	57.3412
AT2G29050	8.85169	9.19138	19.4132	11.7295
AT2G29090	3.04353	8.15389	5.55884	8.95833
AT2G29180	136.31	82.4538	171.632	105.557
AT2G29390	26.0213	36.9637	34.0905	41.2859
AT2G29525	5.77061	6.30176	7.07167	5.72918
AT2G29650	90.8136	93.3725	80.1259	87.3917
AT2G29900	3.3361	16.2497	7.36589	16.5631
AT2G29980	82.5991	84.8944	133.846	88.0532
AT2G30040	22.5371	25.2749	24.0176	22.9813
AT2G30070	10.8301	15.2281	24.5962	16.1055
AT2G30080	3.93213	5.44716	6.05623	5.1364
AT2G30370	5.76569	4.84365	9.02421	4.69814
AT2G30570	1082.95	693.668	955.578	880.877
AT2G30615	4.11487	1.94711	16.3556	3.83842
AT2G30700	18.1141	24.99	24.1596	27.9831
AT2G30890	11.7655	16.2003	16.3927	20.424
AT2G30950	261.082	304.976	234.078	289.395
AT2G31090	60.3226	18.6984	61.5462	36.8904
AT2G31260	7.21707	12.7912	8.51945	12.1346
AT2G31360	60.909	119.857	93.133	122.825
AT2G31440	16.0307	19.4257	30.3707	26.9328
AT2G31490	228.059	104.479	227.279	149.666
AT2G31530	25.7639	27.591	19.7782	22.3263
AT2G31820	26.6387	29.8595	30.9419	30.1537
AT2G31960	9.06574	19.6127	9.48529	15.6151
AT2G32040	28.2027	27.4579	30.1317	27.7126
AT2G32280	2.88925	8.97022	2.20063	8.28278
AT2G32295	9.69953	8.20844	11.7537	7.81878
AT2G32340	4.56638	0.67757	5.96822	1.86904
AT2G32380	11.221	38.2201	19.7088	38.2233
AT2G32390	3.95788	6.6419	4.96144	7.1086
AT2G32400	3.60752	8.12627	6.73566	7.591
AT2G32430	2.1648	3.49763	2.79768	3.83698
AT2G32480	123.976	128.23	102.87	120.43
AT2G32720	161.754	96.488	133.252	118.295
AT2G32730	53.8366	72.0761	41.2992	58.9738
AT2G33050	8.63491	22.0235	10.2821	20.712
AT2G33060	4.30239	6.54228	5.3799	4.95958
AT2G33120	101.708	80.7366	86.711	90.798
AT2G33170	6.40719	8.7163	7.65846	9.06105
AT2G33220	181.838	131.368	170.268	168.505
AT2G33250	70.1233	47.6804	104.477	54.9796
AT2G33330	22.5831	87.5258	38.3452	83.0493
AT2G33570	9.85433	31.4793	16.9257	32.534
AT2G33580	2.24659	9.39322	3.44029	7.76753
AT2G33855	72.8728	36.4499	87.7025	55.4398
AT2G34190	3.55608	11.5515	6.33425	9.93147
AT2G34200	24.7266	11.3145	20.1655	14.6642
AT2G34250	35.6949	119.481	54.6948	115.637
AT2G34355	1.9965	9.16138	5.52713	8.19449
AT2G34380	3.86277	6.08417	5.36732	6.81844
AT2G34770	66.5577	82.7496	83.9855	93.903
AT2G34980	0.947802	2.47773	2.24258	2.73932
AT2G35060	11.7827	24.0106	15.747	22.7054
AT2G35190	35.9172	32.3295	29.3927	28.0902
AT2G35260	210.853	155.55	208.921	170.812
AT2G35360	14.377	14.7086	16.7595	13.3956
AT2G35420	10.5522	6.48298	13.3719	6.58483
AT2G35470	52.2847	44.4799	70.2114	50.1715
AT2G35520	52.4354	34.9972	55.3016	52.673
AT2G35710	6.10977	11.105	12.5748	10.3997
AT2G35740	3.12114	1.97271	5.03617	3.01617
AT2G35760	3.05053	16.5235	7.25624	20.428
AT2G35790	89.8115	59.4811	79.7954	71.8371
AT2G35910	2.05116	3.32078	3.16576	4.63526
AT2G36090	5.14574	4.75801	7.88862	5.6698
AT2G36300	10.9524	27.5556	18.0855	30.6038
AT2G36380	7.94283	15.974	8.33884	13.5693
AT2G36430	29.3715	18.8875	34.4582	23.755
AT2G36500	4.45687	4.63606	4.18638	4.10588
AT2G36570	4.833	23.5611	11.9116	20.6203
AT2G36630	6.9143	25.5397	14.4557	23.5384
AT2G36670	4.00192	10.4903	6.47543	10.2831
AT2G36830	135.946	377.088	180.284	365.57
AT2G36885	97.3543	81.6164	68.1643	74.7239
AT2G36900	49.2147	33.7474	76.8231	42.9433
AT2G36910	13.448	33.6518	20.2013	33.8483
AT2G37035	7.3774	19.4689	13.3221	18.6597
AT2G37050	10.4173	27.1747	17.4818	26.0511
AT2G37180	8.01017	30.4574	16.0499	29.993
AT2G37200	41.6046	21.2331	84.8506	38.2019
AT2G37330	8.01857	8.34229	18.4663	9.24309
AT2G37460	10.2959	26.1561	17.0392	23.9788
AT2G37530	2.65041	1.13851	7.35215	3.16462
AT2G37580	3.99145	6.48766	8.8779	7.54657
AT2G37860	37.0043	23.9711	45.041	29.859
AT2G37925	2.95877	2.00303	1.9172	3.20234
AT2G37940	25.8738	47.5499	35.4463	49.6692
AT2G37950	28.2798	19.0993	31.2643	16.7925
AT2G38010	2.30313	16.2062	5.92802	14.9374
AT2G38050	8.83655	28.9161	15.5665	30.235
AT2G38110	5.02987	19.0383	7.83046	14.8638
AT2G38170	81.2505	129.77	130.986	135.768
AT2G38185	5.23409	2.87019	8.01914	3.46219
AT2G38290	9.50967	31.3688	18.5051	28.4351
AT2G38330	43.2376	30.5511	47.4007	32.1896
AT2G38360	19.4679	40.6835	17.6785	37.111
AT2G38550	85.1132	88.9545	71.4904	84.6253
AT2G38650	11.2071	37.4765	21.9918	36.0204
AT2G38780	50.1443	49.6003	36.9512	40.738
AT2G38940	2.26021	8.71364	3.25442	8.6044
AT2G38960	4.42481	14.9826	7.0583	12.3932
AT2G38995	8.03248	10.2555	10.5686	7.80672
AT2G39010	115.726	219.962	196.745	233.351
AT2G39130	7.48094	18.3877	10.7351	16.493
AT2G39180	2.69393	4.35049	3.62757	4.7408
AT2G39210	3.74618	9.36759	6.54015	8.81557
AT2G39290	78.4196	53.5753	62.9977	61.4852
AT2G39350	2.06364	4.46794	2.47697	4.49441
AT2G39360	3.34687	13.0437	5.22539	11.3824
AT2G39450	26.343	41.2584	45.6526	44.4567
AT2G39500	46.4462	12.1991	81.0373	25.7857
AT2G39805	12.2249	19.6411	20.6254	19.2063
AT2G39920	9.32646	13.1819	17.7674	13.5916
AT2G39960	31.4125	63.8676	45.8481	68.5182
AT2G39970	82.0729	61.7972	76.4763	68.2018
AT2G40095	3.17005	7.42768	7.41748	6.81238
AT2G40100	143.874	140.737	115.317	147.942
AT2G40150	4.50433	6.7937	8.61049	6.4656
AT2G40316	11.394	15.0716	20.7723	15.0425
AT2G40380	21.2891	41.4953	22.4221	44.0768
AT2G40420	3.98839	13.5435	8.19083	14.1069
AT2G40540	20.6338	55.8799	31.6024	52.1687
AT2G40765	170.276	79.2083	177.918	106.758
AT2G40800	32.9629	30.9973	26.8976	24.1568
AT2G40900	5.94743	7.42194	10.5038	8.05322
AT2G40940	22.8269	35.5359	27.9076	38.911
AT2G40950	11.5322	15.1374	15.1161	16.5421
AT2G41000	14.8169	6.35803	17.6985	9.10445
AT2G41050	3.28443	4.76495	6.28431	5.26964
AT2G41200	23.2162	9.12499	31.1514	15.5514
AT2G41230	10.3051	2.74357	12.9338	5.69795
AT2G41490	4.91959	12.614	10.4201	12.3674
AT2G41560	70.7268	85.8326	87.5033	87.2751
AT2G41640	11.4496	17.799	22.5077	20.2213
AT2G41700	3.91234	7.87764	4.39503	6.21448
AT2G41705	7.26812	6.97848	13.3742	8.88657
AT2G41770	2.91229	17.4851	5.53478	14.8173
AT2G41820	6.22974	17.5028	10.6767	15.5027
AT2G41890	6.04111	14.758	9.05507	13.9366
AT2G41905	5.3363	0.896284	12.3025	4.75182
AT2G41990	5.23048	12.3413	7.00646	14.9334
AT2G42210	208.638	156.19	201.563	170.857
AT2G42360	1.97864	3.40355	5.95023	3.79489
AT2G42390	34.4068	18.438	48.6542	29.111
AT2G42770	103.632	76.0318	87.1026	80.0325
AT2G42940	5.03484	2.39717	6.10192	1.33222
AT2G42950	7.3414	5.40922	8.61528	5.57032
AT2G42975	93.8912	53.4469	97.8969	68.3103
AT2G43070	6.97962	20.5213	14.5038	20.6892
AT2G43250	7.58756	6.91145	9.40245	8.02366
AT2G43330	10.7395	27.2156	17.4068	25.7476
AT2G43420	19.4463	20.0185	25.1682	19.2991
AT2G43540	68.7232	30.0571	122.989	49.2099
AT2G43780	68.4188	32.0544	75.169	41.4625
AT2G43800	2.77911	13.5965	3.80512	12.5334
AT2G44080	55.9563	31.0896	62.5257	41.0361
AT2G44260	10.8338	8.61442	7.58172	6.35956
AT2G44490	112.77	133.632	111.908	120.241
AT2G44520	49.1258	34.9158	43.1487	43.792
AT2G44660	9.12745	10.8146	18.0021	13.9254
AT2G44790	3.33865	15.2181	7.47066	15.6209
AT2G44870	147.687	124.915	138.288	137.675
AT2G45060	44.4589	36.1524	42.0396	34.5073
AT2G45140	73.6658	62.4004	56.6847	61.6789
AT2G45150	20.438	15.9397	20.467	15.781
AT2G45200	70.0548	42.1448	78.5907	49.5993
AT2G45310	4.56539	5.08216	8.87638	4.45706
AT2G45340	11.5339	31.174	18.1591	30.1436
AT2G45590	18.5127	32.3506	24.1648	31.2933
AT2G45830	2.36658	1.70583	3.61624	1.57217
AT2G45870	2.83783	3.82256	4.7757	3.60849
AT2G45960	134.098	367.064	204.137	381.808
AT2G45980	58.5738	40.9817	78.7217	50.9664
AT2G46060	2.45985	10.5486	3.69091	10.5759
AT2G46160	19.1073	12.2099	28.4752	14.8374
AT2G46170	22.0196	48.7658	37.3549	50.684
AT2G46210	3.80547	4.20476	4.91258	4.40385
AT2G46430	2.18333	4.46055	3.48005	3.8178
AT2G46450	18.5939	24.1912	35.6772	23.4232
AT2G46470	28.7354	20.7193	37.0577	24.4594
AT2G46550	94.1456	66.4304	100.579	75.9381
AT2G46640	16.6068	16.7398	15.1025	14.5545
AT2G46650	102.32	73.7981	91.3217	83.7629
AT2G46780	17.7022	15.7726	21.5234	13.9204
AT2G46800	25.7623	44.9705	53.3278	47.9481
AT2G46890	4.34149	17.1277	8.73368	16.1873
AT2G47000	1.89135	4.24341	3.0291	3.50453
AT2G47070	44.4067	45.2122	40.7571	42.2228
AT2G47320	20.1206	97.0332	46.2904	83.933
AT2G47490	31.0322	16.0448	35.3628	20.4562
AT2G47600	11.8858	13.9594	22.6777	16.0884
AT2G47650	35.7344	58.9093	59.0365	54.7705
AT2G47760	10.6372	17.853	16.19	19.4225
AT2G47840	159.721	142.991	147.404	156.312
AT2G47930	64.9308	47.0826	75.9895	55.6235
AT2G48010	5.73461	10.3997	6.485	9.64267
AT2G48020	16.8976	47.9508	30.542	42.1184
AT2G48070	181.92	106.445	208.416	135.507
AT3G01040	6.30882	9.76546	10.7492	9.55049
AT3G01100	4.30933	11.5484	6.29737	10.7279
AT3G01170	26.2764	21.057	36.5825	25.2056
AT3G01350	2.29349	4.50247	4.80443	4.5192
AT3G01360	7.14359	17.9384	15.1665	18.9278
AT3G01380	3.81513	6.15763	5.53962	5.18162
AT3G01550	39.8778	33.0729	37.5726	33.3477
AT3G01570	5.25016	3.66703	5.41357	4.84027
AT3G01720	5.35905	13.8553	7.97961	15.2648
AT3G01930	10.348	13.2746	11.3326	11.8441
AT3G01940	39.1547	4.22663	51.041	29.5671
AT3G01950	43.3986	11.157	61.9774	24.9315
AT3G02050	10.4843	26.7389	17.1804	26.8224
AT3G02130	9.31718	18.8193	13.4074	14.2809
AT3G02350	9.23753	41.0508	19.4354	40.8812
AT3G02420	16.882	39.6764	21.6481	35.6368
AT3G02450	60.8257	57.0163	57.7053	57.4153
AT3G02600	26.7153	48.8282	43.3642	49.2776
AT3G02640	27.8484	92.4757	33.8209	93.1115
AT3G02690	66.8397	51.632	84.0631	57.2571
AT3G02880	7.49681	30.0514	15.5384	29.1647
AT3G02900	140.05	94.6753	128.585	112.392
AT3G03050	5.03405	12.4853	7.23234	11.8947
AT3G03160	36.1949	47.8174	63.4843	61.6808
AT3G03210	5.98434	11.8205	6.83052	9.88811
AT3G03305	2.973	12.8565	4.50621	13.0936
AT3G03330	8.31844	18.9592	19.1007	20.8252
AT3G03550	15.4111	26.6978	22.4797	26.1995
AT3G03680	10.7433	14.6549	7.91721	12.182
AT3G03720	7.11385	23.9646	13.0166	21.0902
AT3G03770	10.4538	27.1169	15.2894	23.9341
AT3G03860	7.42963	35.6259	13.2721	37.2541
AT3G03870	48.6948	33.1546	48.0006	39.4985
AT3G03970	7.8287	6.88846	8.38708	6.65716
AT3G04080	9.5246	26.5297	20.607	27.4431
AT3G04090	28.6639	105.535	53.0645	109.284
AT3G04110	1.45622	6.83473	4.16992	5.57412
AT3G04310	34.2221	16.6182	31.7814	20.6251
AT3G04580	3.9268	10.6209	5.90953	10.634
AT3G04690	3.19987	1.53514	3.76098	2.27117
AT3G04970	2.72298	7.11826	5.97893	7.92694
AT3G05010	5.81938	24.6597	11.7833	23.6149
AT3G05030	9.2832	16.8523	12.8946	13.7889
AT3G05130	19.3611	22.1238	13.9259	17.3613
AT3G05200	11.4943	41.8102	22.04	42.4766
AT3G05280	26.3798	45.3257	36.0827	49.4997
AT3G05370	6.61086	3.74542	7.17125	4.20541
AT3G05470	3.5232	7.58096	6.19361	6.26732
AT3G05710	27.2327	20.9053	29.6135	22.4353
AT3G05880	301.27	131.859	304.976	210.051
AT3G05940	2.32938	10.0147	5.98431	11.0175
AT3G06035	10.8702	37.9782	17.8855	47.4705
AT3G06060	19.5175	40.3097	33.0697	47.0369
AT3G06080	38.4997	52.8311	60.5777	53.8441
AT3G06170	7.34028	48.9135	12.7152	45.8114
AT3G06210	7.96946	5.49219	11.0955	6.46472
AT3G06330	23.904	25.3201	24.0876	25.0879
AT3G06360	12.2979	3.57138	10.5229	8.97224
AT3G06450	7.61776	22.1103	13.7957	19.7377
AT3G06470	12.7672	43.7136	21.7667	39.7864
AT3G06510	29.8212	56.6121	50.606	60.4784
AT3G06600	4.60161	3.31295	2.66053	2.20655
AT3G06890	4.90089	6.05392	7.48583	8.95137
AT3G07080	5.16222	16.3562	9.78028	15.3162
AT3G07140	7.61206	18.4123	19.88	17.5076
AT3G07190	8.2002	14.1665	16.0574	14.0994
AT3G07330	11.1136	23.2048	16.7215	22.1447
AT3G07400	10.2384	12.7842	10.1587	12.3675
AT3G07520	4.08782	3.82878	4.96247	3.57203
AT3G07540	2.31509	16.7076	3.72754	14.3999
AT3G07570	5.45541	17.7557	10.0643	19.7794
AT3G07700	49.7509	51.8588	39.5171	44.9086
AT3G07910	141.289	63.8103	137.991	94.4969
AT3G07950	10.9355	33.9987	20.4525	40.5496
AT3G08550	5.05544	29.0908	8.37889	28.0837
AT3G08580	439.769	405.291	444.791	407.39
AT3G08600	13.6014	29.6233	20.96	31.3182
AT3G08630	22.695	23.1835	22.7261	22.3255
AT3G08640	67.6497	59.9371	56.0707	62.2031
AT3G08650	19.7662	45.7999	37.088	46.9174
AT3G08680	21.2433	36.7564	25.8161	36.7515
AT3G08930	17.8325	72.1316	30.9353	69.0771
AT3G08950	16.3112	13.5644	18.1621	13.4919
AT3G09020	2.61251	9.71012	4.55014	8.58858
AT3G09320	8.92711	10.6551	21.7737	16.2573
AT3G09410	7.81565	18.639	15.482	16.5383
AT3G09470	13.3893	20.1779	28.8206	21.6706
AT3G09550	3.14788	1.28534	3.69701	1.72127
AT3G09570	4.53739	25.2645	9.38844	28.415
AT3G09735	181.364	84.9944	225.036	121.214
AT3G09740	111.575	93.0109	101.675	97.4248
AT3G09760	29.4861	19.5914	30.5611	20.7162
AT3G09860	314.786	183.748	297.725	235.149
AT3G10260	20.6048	55.4729	35.8616	57.2245
AT3G10500	14.3981	13.5001	14.0531	11.0933
AT3G10680	7.09732	8.30808	4.772	5.39012
AT3G10730	8.00047	28.2066	12.8163	25.3955
AT3G10800	15.2019	23.8048	16.8186	23.9926
AT3G10810	10.8086	30.9749	15.9392	28.3837
AT3G10910	2.90689	2.96297	6.17912	2.9366
AT3G10960	4.79315	8.86081	7.8294	9.18153
AT3G11110	72.9992	51.8725	132.748	69.3126
AT3G11170	204.535	197.542	218.656	194.106
AT3G11320	8.29678	15.2612	16.9439	14.5176
AT3G11397	18.9314	47.9287	22.247	47.6047
AT3G11420	6.49377	11.9836	12.1912	14.4104
AT3G11530	28.9846	40.8975	40.0902	51.9054
AT3G11560	65.7044	69.4511	64.5045	66.7003
AT3G11650	25.4583	56.34	41.5596	55.6066
AT3G11660	10.9455	62.1349	18.0626	63.6056
AT3G11820	69.9811	64.2067	75.5676	66.5793
AT3G11900	6.63243	12.6029	13.4492	13.2652
AT3G11930	180.627	145.431	142.337	155.457
AT3G12120	184.176	171.143	305.578	202.991
AT3G12180	8.29395	23.5158	15.2566	24.7908
AT3G12360	35.5277	45.5766	48.7663	42.6133
AT3G12520	4.96214	7.87536	5.95526	6.16704
AT3G12620	63.3159	37.54	70.7728	42.9225
AT3G12650	58.7274	30.2782	59.3524	39.6323
AT3G12750	2.92035	10.6245	4.85169	10.774
AT3G12870	26.5903	33.7794	27.9154	30.7579
AT3G13050	2.475	8.2979	6.89518	8.99761
AT3G13062	12.886	31.6575	30.1033	33.8937
AT3G13070	55.288	49.4006	49.9082	41.5257
AT3G13175	47.0304	37.3681	71.0099	44.3463
AT3G13360	50.9688	34.2238	53.9571	38.396
AT3G13380	2.94809	4.12279	3.46413	3.78963
AT3G13410	20.3201	93.3612	58.2391	103.272
AT3G13520	224.092	101.627	285.651	168.171
AT3G13560	3.90269	31.717	7.93486	27.8272
AT3G13720	29.8661	49.0877	41.0772	56.0576
AT3G13772	10.3693	40.76	20.8837	36.3517
AT3G13845	65.5919	25.7413	73.1376	41.2766
AT3G14070	1.20987	3.54097	2.4395	3.15646
AT3G14205	25.3442	19.2838	28.6715	20.4588
AT3G14410	4.57279	17.7116	11.0306	18.8066
AT3G14430	40.4879	14.3135	43.5694	24.1024
AT3G14595	63.9336	39.0517	104.85	58.2528
AT3G14760	22.1997	25.7212	31.4818	28.8051
AT3G14770	20.0092	38.833	33.6653	38.2203
AT3G14810	7.22597	12.4328	9.81802	11.2634
AT3G14860	16.3739	32.8562	24.9979	33.9499
AT3G15110	159.129	115.888	138.405	129.861
AT3G15380	5.73961	18.1194	11.8752	17.7902
AT3G15395	78.7848	35.62	95.9326	39.7412
AT3G15480	21.838	67.7401	39.6102	77.6285
AT3G15530	20.5385	38.3841	42.3371	39.1673
AT3G15710	22.7077	59.5247	38.8813	55.7253
AT3G15720	2.41131	2.00082	2.9254	1.96661
AT3G15780	52.492	25.9178	61.9245	40.7441
AT3G15850	185.425	183.441	201.648	188.862
AT3G15900	81.0205	42.4013	99.015	54.2358
AT3G15940	8.7925	18.6254	11.9282	17.3982
AT3G16090	4.89159	19.3689	8.32677	15.6156
AT3G16200	12.0863	24.1562	18.3826	23.5454
AT3G16240	139.534	464.752	215.212	461.918
AT3G16370	64.9694	216.404	103.801	231.344
AT3G16660	13.8656	92.2734	19.4288	100.498
AT3G16670	30.6447	165.469	38.1816	165.598
AT3G16720	22.0926	47.4604	34.5436	47.6672
AT3G17000	77.5034	66.337	71.9227	62.4331
AT3G17120	12.181	12.857	15.3537	14.636
AT3G17420	3.40959	9.0985	5.5437	7.30329
AT3G17430	9.10567	24.123	13.5169	25.9988
AT3G17440	75.4338	47.4983	74.942	51.3985
AT3G17611	9.50422	11.2431	10.2368	9.5584
AT3G17700	7.34106	11.0517	7.70548	8.94343
AT3G17780	34.2017	74.447	43.0216	71.2297
AT3G17830	10.1427	5.41488	8.74523	7.3616
AT3G17840	11.437	44.5311	17.1766	35.0759
AT3G17970	15.1578	42.572	24.2481	39.1963
AT3G18010	9.74574	10.559	14.658	11.0891
AT3G18250	10.239	3.62711	12.9107	5.93658
AT3G18350	12.1133	11.1609	11.4949	10.2724
AT3G18440	9.87086	26.9088	17.5185	24.6046
AT3G18480	30.9131	39.6409	24.5743	31.3121
AT3G18620	3.61015	3.87615	5.88963	3.59549
AT3G18773	12.9101	23.7097	14.2749	21.6709
AT3G18800	33.3319	50.1169	43.2661	55.3767
AT3G18830	23.652	44.3413	45.0906	47.4703
AT3G18850	9.55421	17.2301	18.0066	19.2239
AT3G19300	1.60224	3.23448	3.43643	2.9088
AT3G19330	5.77268	3.41332	6.25681	3.10544
AT3G19460	13.359	26.3383	22.0943	22.5597
AT3G19553	10.1718	20.2504	19.9707	25.6806
AT3G19640	32.6586	31.4842	28.0124	31.4731
AT3G19820	87.2401	153.499	129.323	159.029
AT3G19830	21.9298	21.4862	21.5735	19.8051
AT3G19930	11.7889	44.9444	22.5918	42.3185
AT3G20015	5.53771	14.8081	9.15972	14.474
AT3G20080	6.79514	5.27897	8.84485	5.16991
AT3G20130	2.13778	2.7587	2.76045	2.97175
AT3G20240	27.6677	19.1479	33.3523	20.1748
AT3G20300	7.27134	18.8259	13.489	18.7019
AT3G20320	50.8182	50.1637	49.8045	49.8155
AT3G20450	4.60828	1.43995	9.8512	2.04743
AT3G20510	28.2338	22.073	37.4411	34.1194
AT3G20660	2.27907	5.43846	3.7836	4.64421
AT3G20865	4.82915	0.963162	10.1256	2.68055
AT3G20870	17.1542	37.3357	28.5346	36.6163
AT3G20900	59.6304	30.8093	61.7042	28.7334
AT3G20920	21.7085	39.8128	35.2082	41.6831
AT3G21090	2.44873	4.27517	4.08619	3.4473
AT3G21160	5.42031	21.15	10.4367	19.295
AT3G21250	6.99591	15.0679	8.56766	11.6339
AT3G21550	8.41473	14.4975	6.87469	13.3451
AT3G21580	50.2321	40.4473	35.7577	39.3629
AT3G21610	38.2476	36.5876	43.7785	37.9664
AT3G21630	3.4927	22.7807	7.3208	21.2739
AT3G21640	39.9765	36.3617	33.4198	34.8032
AT3G21670	11.6582	46.7522	20.5407	42.7611
AT3G21690	27.5451	84.9086	37.2225	75.0995
AT3G21865	40.9255	50.729	48.9519	51.888
AT3G22180	2.92306	5.00226	4.1679	5.2171
AT3G22845	17.3573	74.0338	35.0564	76.9679
AT3G23150	2.35589	4.89454	4.31166	4.69244
AT3G23430	7.53416	8.75072	11.7126	7.41179
AT3G23550	5.97249	19.2447	12.737	19.9674
AT3G23560	3.23584	10.3129	8.92141	9.09854
AT3G23580	42.1446	36.2969	35.9989	35.6307
AT3G23750	13.2393	45.4314	23.6019	39.3146
AT3G23820	47.3916	152.735	65.3319	140.773
AT3G24160	22.7473	124.387	50.4319	122.656
AT3G24315	22.7123	20.8969	28.4284	21.9156
AT3G24350	50.8649	50.3413	42.0969	48.7926
AT3G24550	27.221	69.627	34.0338	62.4412
AT3G24570	68.8584	49.1996	73.2561	58.5507
AT3G24660	2.29165	8.68644	4.47741	8.12411
AT3G25040	19.1107	84.1627	36.2177	79.4404
AT3G25120	43.1202	18.2222	61.8521	27.6083
AT3G25130	2.82546	7.81729	5.11528	6.70485
AT3G25190	24.8038	28.9696	22.9654	23.6377
AT3G25410	45.6076	40.9268	43.3867	38.139
AT3G25480	97.448	79.1506	82.7988	82.8665
AT3G25500	6.80282	21.8659	8.5225	17.9098
AT3G25540	9.71385	26.4606	21.2787	28.0629
AT3G25560	4.50767	11.7246	7.26174	9.38715
AT3G25680	19.9075	24.3918	19.1599	21.6769
AT3G25805	68.8256	57.2012	57.5322	62.7302
AT3G26085	53.2146	36.0904	77.0082	41.023
AT3G26090	3.34103	12.8023	8.15756	13.0113
AT3G26370	9.55193	25.7837	18.5013	24.8929
AT3G26520	190.539	561.246	260.876	587.463
AT3G26570	155.18	165.081	140.939	162.93
AT3G26580	148.46	136.535	119.501	132.795
AT3G26710	175.011	131.619	171.025	147.215
AT3G26935	18.7086	45.2649	33.5285	45.0763
AT3G27020	8.02626	36.194	15.8834	35.5509
AT3G27080	106.23	74.1629	94.685	83.8767
AT3G27200	6.75757	10.4596	7.31363	11.7783
AT3G27270	1.5226	6.34271	3.10127	8.84714
AT3G27390	8.04086	37.9602	18.2772	36.2191
AT3G27540	4.8306	9.58547	10.8273	7.72025
AT3G27570	59.396	57.5107	50.5373	53.9997
AT3G27820	140.311	126.541	132.488	127.977
AT3G27870	1.90784	3.0584	3.85555	2.54093
AT3G28007	1.67064	5.26626	4.01117	4.99581
AT3G28040	6.74274	43.6627	11.0855	39.915
AT3G28050	35.7422	56.5292	63.7531	60.1122
AT3G28180	30.9263	64.3281	47.9871	62.1095
AT3G28220	7.80078	37.7806	16.3472	42.7446
AT3G28270	59.4629	62.4707	62.5345	57.414
AT3G28420	2.68682	6.55775	2.96554	4.04708
AT3G28450	2.85271	16.833	5.04277	13.3326
AT3G28640	3.28291	1.84779	2.96477	1.77743
AT3G28670	21.1941	19.0727	21.0825	16.9107
AT3G28720	4.70451	17.2585	7.33617	15.6204
AT3G28860	9.42317	38.6447	17.0145	36.5508
AT3G28960	2.36861	2.50646	3.84544	2.61643
AT3G29034	9.81589	3.2904	14.3432	5.43991
AT3G29170	17.2913	10.1093	18.8833	17.2158
AT3G29270	37.4649	23.5526	42.2336	29.1044
AT3G30390	25.4699	105.252	44.8406	103.474
AT3G42640	4.73702	1.87387	5.43705	1.91718
AT3G43220	27.6008	21.0848	21.0165	16.5334
AT3G43430	8.00415	10.2454	11.9585	12.1731
AT3G43520	148.027	142.638	120.57	140.774
AT3G43720	55.9876	157.216	82.106	181.162
AT3G43960	4.40159	14.2371	10.445	12.774
AT3G44020	115.1	62.0582	109.654	83.6961
AT3G44100	88.7572	116.533	76.6106	135.657
AT3G44220	3.55244	13.5994	9.39284	14.456
AT3G44330	15.6335	35.7811	32.0732	36.3316
AT3G45040	6.66644	13.3273	10.8613	14.8353
AT3G45230	30.2295	57.3311	36.5165	64.9856
AT3G45860	4.30548	6.2572	7.49543	5.48693
AT3G46180	6.36759	7.93201	12.7457	10.7037
AT3G46290	3.9495	23.286	6.38662	21.6651
AT3G46900	46.7238	54.7973	51.7395	60.7629
AT3G46980	23.1322	26.3826	18.4359	23.9854
AT3G47250	96.2805	68.8161	118.013	82.3126
AT3G47420	7.35637	23.9683	12.9775	21.6351
AT3G47430	103.593	87.9885	109.299	86.2112
AT3G47550	41.4029	47.246	35.8497	43.6187
AT3G47570	4.39879	5.15529	8.50069	4.70503
AT3G47670	12.5725	38.8125	14.5867	41.3312
AT3G47910	18.8864	20.4199	14.6826	14.8122
AT3G47980	10.9331	3.22638	8.62618	4.02627
AT3G47990	10.375	22.0759	24.8718	22.6938
AT3G48030	20.2916	10.6346	25.6142	14.404
AT3G48200	23.6708	43.6464	37.9947	41.3994
AT3G48410	3.34144	6.0916	7.58971	6.9965
AT3G48740	45.0897	127.728	72.4854	120.371
AT3G48760	15.0765	45.0924	27.5134	43.0388
AT3G48980	5.47763	6.91482	10.6765	7.3147
AT3G49070	3.05778	3.27673	5.13342	3.17519
AT3G49310	5.46433	16.2878	13.206	16.6365
AT3G49670	8.47798	34.593	12.4974	30.7594
AT3G49720	49.8505	161.174	73.7632	157.311
AT3G49880	5.06259	13.6739	11.468	12.6253
AT3G50050	3.44005	6.80649	4.09687	5.31287
AT3G50620	1.61321	5.49033	5.81619	4.53755
AT3G50685	237.628	168.285	236.588	202.893
AT3G50830	35.2831	90.2234	48.933	101.59
AT3G50910	36.3066	25.1508	37.0118	27.3533
AT3G50920	31.9978	21.5085	33.8163	23.8331
AT3G51040	35.4752	27.7594	32.8635	29.5392
AT3G51050	8.04751	30.9506	14.5013	27.3795
AT3G51130	44.1189	45.2458	36.9819	42.0181
AT3G51140	68.3799	52.525	61.1199	61.6391
AT3G51370	102.888	70.1917	107.809	81.6764
AT3G51390	9.27473	21.0732	14.7037	21.0084
AT3G51460	31.9753	38.3929	25.6119	32.3028
AT3G51480	2.64037	3.1738	2.74815	2.55837
AT3G51510	248.803	176.587	239.518	200.428
AT3G51520	5.92643	24.3741	17.9162	25.0726
AT3G51550	32.5375	100.195	50.0705	97.6213
AT3G51580	9.21289	21.3519	16.1453	23.0611
AT3G51610	17.6351	43.7146	32.9801	45.6355
AT3G51710	3.41742	4.43126	6.85374	4.38184
AT3G51740	15.5412	20.8936	20.3723	18.2161
AT3G51820	200.429	211.615	171.3	195.107
AT3G51860	1.06864	4.81214	2.23108	4.85686
AT3G51870	51.743	40.0119	50.7986	39.3572
AT3G51895	5.82395	16.577	8.86501	13.2525
AT3G51970	1.45142	4.92191	3.51871	5.86357
AT3G52070	83.5489	43.6821	94.3601	53.9372
AT3G52190	21.0762	25.8997	16.5808	22.8727
AT3G52400	79.2253	71.7173	83.5357	73.312
AT3G52460	3.96551	3.05219	8.41173	3.81877
AT3G52470	19.1495	77.6453	33.9272	72.6815
AT3G52640	6.29807	25.4474	9.68706	28.3633
AT3G52760	19.6531	28.0051	24.6254	28.5665
AT3G52850	17.8995	64.7515	29.2207	58.9739
AT3G52940	3.61611	31.582	10.2707	29.7655
AT3G52950	26.5017	25.4059	24.8302	24.4634
AT3G53190	16.8985	45.8224	33.6493	44.8743
AT3G53210	2.0034	3.0005	7.46176	5.83282
AT3G53240	9.26497	4.82185	14.4489	5.56039
AT3G53370	47.6241	24.3617	43.5288	27.9639
AT3G53380	5.91277	19.3777	7.89307	16.6677
AT3G53400	15.5372	11.8913	19.2169	14.0879
AT3G53420	108.144	348.252	171.595	352.69
AT3G53470	174.389	100.257	186.512	125.415
AT3G53490	2.81765	9.56624	7.98553	11.8296
AT3G53510	6.51814	4.07283	8.65807	4.58032
AT3G53780	5.63826	15.2331	8.5299	12.5168
AT3G53810	5.58056	8.8214	9.34066	9.31906
AT3G53850	33.3552	14.8393	45.9999	25.4502
AT3G53960	4.65329	14.7217	9.62771	12.6204
AT3G54010	43.7014	37.4204	31.9005	32.4535
AT3G54020	3.68136	8.15265	8.94813	9.59113
AT3G54080	6.72838	32.4433	14.4054	29.8602
AT3G54100	5.25756	8.98395	7.96031	9.73759
AT3G54120	3.62072	6.88022	7.50752	6.78388
AT3G54140	7.81598	29.0881	16.3167	27.8761
AT3G54200	12.3356	40.6648	20.6254	38.8973
AT3G54300	90.0485	81.8709	69.3167	74.6362
AT3G54820	4.60653	20.9341	9.81626	21.8099
AT3G54830	12.688	23.7534	18.7577	23.3891
AT3G55110	5.61488	7.06976	6.33337	6.58011
AT3G55130	20.6656	28.7011	22.613	28.9429
AT3G55360	25.5381	85.1638	40.7366	84.3467
AT3G55390	20.2876	17.3113	22.7078	21.2215
AT3G55530	8.61035	9.1987	16.4938	11.8689
AT3G55740	3.96238	11.0739	9.4667	9.01212
AT3G55880	7.74115	18.0232	19.132	17.5582
AT3G55950	2.78875	3.70209	4.98006	3.65439
AT3G56000	2.37482	1.7466	4.13851	2.30209
AT3G56010	164.901	101.917	182.974	126.875
AT3G56050	31.1431	80.0831	57.8525	85.7761
AT3G56110	20.802	50.6754	28.4582	54.0487
AT3G56160	46.4157	38.5782	56.6526	34.65
AT3G56200	7.04658	15.1821	13.405	18.7562
AT3G56370	7.88523	29.5178	12.4444	26.2771
AT3G56430	21.0719	22.1455	20.1783	23.0059
AT3G56590	5.14196	11.7828	8.86038	12.1146
AT3G56620	4.11018	7.39203	7.77834	6.25158
AT3G56740	9.26079	16.0511	13.8647	14.6447
AT3G56830	15.3131	6.90648	20.01	8.55161
AT3G56930	4.96459	10.8976	10.072	8.5062
AT3G57220	4.93911	12.6789	10.1403	13.7255
AT3G57280	111.932	96.0355	88.6725	96.2498
AT3G57330	18.3338	34.0169	23.1516	32.4775
AT3G57400	19.9486	40.4075	36.2816	45.7692
AT3G57420	4.4358	16.1396	8.66954	14.4654
AT3G57500	10.079	7.30033	11.2496	7.51836
AT3G57650	14.8099	50.7968	26.3667	47.0636
AT3G57730	5.17901	4.37678	6.65267	4.17828
AT3G57750	14.7963	10.8653	18.3378	12.0117
AT3G57830	6.61479	9.01654	10.4982	9.35177
AT3G57880	17.4498	21.1504	17.283	19.9616
AT3G58100	5.73046	18.978	8.50573	19.298
AT3G58460	9.18389	36.816	19.0681	35.1519
AT3G58790	5.7742	8.04508	10.14	8.0313
AT3G58800	1.88587	5.27166	3.20876	5.32225
AT3G58840	41.6104	42.3457	34.655	37.9205
AT3G58970	35.0364	22.1591	42.9703	24.0999
AT3G59090	14.1861	33.2073	27.6137	31.1362
AT3G59100	2.91436	2.33495	3.08035	1.81872
AT3G59110	14.1666	25.7375	21.5899	23.9964
AT3G59320	2.82831	0.723959	6.83168	1.20915
AT3G59360	13.8362	34.3244	21.2095	30.0988
AT3G59420	3.69989	9.25845	4.61463	8.30041
AT3G59500	35.3116	55.6398	41.3417	53.3969
AT3G59520	2.76412	5.69827	7.15844	6.09449
AT3G59640	45.0068	32.8196	34.5049	31.5987
AT3G59820	21.0073	24.6791	18.3012	21.0434
AT3G59900	16.1941	12.8828	13.6461	11.0875
AT3G60030	45.8427	39.6196	45.2663	39.4346
AT3G60070	2.61611	2.9427	5.29198	2.93571
AT3G60220	9.77939	18.6596	13.2508	16.9967
AT3G60380	11.6406	27.7605	14.6743	26.5735
AT3G60480	39.2537	16.6726	40.968	28.7759
AT3G60590	44.3417	40.5841	45.7939	45.1138
AT3G60600	130.642	102.426	139.106	112.145
AT3G60620	41.1507	39.1161	39.2493	36.4856
AT3G60720	2.00551	3.54822	2.91309	3.97489
AT3G60800	5.39642	21.7182	10.1231	18.8451
AT3G61050	17.7066	65.7468	27.5686	62.187
AT3G61180	12.4739	31.6824	22.8751	30.5743
AT3G61320	24.2637	20.0668	20.1458	20.5722
AT3G61430	42.4212	168.905	72.9636	175.636
AT3G61550	26.1514	20.1366	38.5409	26.0419
AT3G61560	4.86134	11.2058	8.45836	10.5631
AT3G61580	71.6182	76.546	124.054	87.8873
AT3G61640	96.9604	50.6167	102.61	64.1848
AT3G61750	6.68229	9.24726	9.1681	10.6081
AT3G61770	57.4689	45.8299	55.7473	51.4574
AT3G61870	367.783	353.212	296.937	339.736
AT3G61980	13.7958	18.1626	19.8206	22.7241
AT3G62150	6.25273	22.5839	8.38417	18.0039
AT3G62190	30.6535	15.5727	72.8509	23.7017
AT3G62360	9.03541	27.0696	14.3444	24.467
AT3G62370	17.117	33.7825	32.6761	37.4755
AT3G62390	8.76248	16.3987	15.7562	17.6377
AT3G62450	430.299	191.799	423.271	283.403
AT3G62580	28.0315	81.3282	48.5512	85.5701
AT3G62690	5.99712	16.3213	9.15894	14.2491
AT3G62700	9.99291	36.2768	12.7437	29.6031
AT3G63150	35.6951	34.2067	29.8004	30.87
AT3G63160	1236.58	613.226	1199.7	832.901
AT3G63310	29.5655	66.4546	49.5004	64.4
AT3G66654	16.6704	67.1507	32.8665	60.6635
AT4G00110	4.16413	13.1629	6.34141	13.5012
AT4G00170	54.3972	47.8586	45.7607	48.74
AT4G00290	7.40092	11.4624	6.44369	9.89013
AT4G00400	15.7837	53.6349	28.4946	53.5783
AT4G00450	13.5193	15.1011	10.8022	12.0802
AT4G00585	163.125	82.3511	186.485	120.919
AT4G00740	5.17704	30.5398	9.85643	29.292
AT4G00840	6.83916	12.3097	11.985	16.8713
AT4G00900	2.71039	8.87355	3.80739	7.23101
AT4G00970	2.39872	9.98668	5.87444	9.57698
AT4G01010	1.75062	3.61221	3.33818	3.63733
AT4G01080	4.1871	10.3031	5.54757	9.36112
AT4G01150	521.395	384.884	524.957	482.283
AT4G01220	3.81021	17.6365	5.70586	13.8231
AT4G01320	5.90207	52.4638	15.6303	45.9298
AT4G01330	42.8925	64.9563	62.9968	66.6478
AT4G01410	7.27232	27.8502	14.186	25.752
AT4G01440	2.47041	6.90647	6.45214	7.09534
AT4G01450	3.81942	15.7256	10.8154	15.027
AT4G01540	3.95687	4.44552	4.56989	3.09674
AT4G01550	11.8524	13.0457	10.7221	12.7828
AT4G01575	1.96493	3.30646	10.248	4.06023
AT4G01730	2.76144	11.4392	7.54471	10.6197
AT4G01840	5.37189	11.0707	7.55881	12.3767
AT4G01950	18.3684	58.2701	37.4966	57.5597
AT4G01960	64.1879	46.7158	60.7977	51.1626
AT4G02010	9.17571	18.7192	13.3608	17.1326
AT4G02050	9.1482	16.532	17.007	17.2258
AT4G02075	14.5068	9.20224	21.8959	10.3446
AT4G02195	24.2808	18.5821	19.3508	15.3821
AT4G02410	13.178	25.144	17.4095	22.8592
AT4G02600	5.25787	17.7184	10.9785	15.1579
AT4G02630	7.42901	28.0778	12.3671	23.5803
AT4G02900	3.92589	2.27326	3.63314	2.13887
AT4G03280	783.481	694.82	659.584	707.805
AT4G03320	5.70372	3.88388	5.87561	5.36614
AT4G03330	4.018	1.87836	2.5132	2.20858
AT4G03390	7.97677	26.7087	12.2448	24.5485
AT4G03440	3.28693	1.26528	4.2356	2.16811
AT4G03550	7.53675	18.5886	7.39559	15.16
AT4G03560	14.0274	62.7111	23.5217	58.15
AT4G03600	3.66513	2.69971	5.80879	4.13994
AT4G04340	21.2141	73.1901	41.4145	72.3931
AT4G04850	33.9865	32.752	34.7436	29.8541
AT4G04925	44.6392	21.5842	87.6361	32.1464
AT4G04960	7.78302	12.6032	10.052	10.8362
AT4G04970	5.44401	7.15616	6.2985	6.2669
AT4G07825	26.4198	25.6877	32.5296	28.5695
AT4G08230	40.7566	50.9099	45.6811	47.313
AT4G08290	4.14367	25.1688	9.55044	21.2311
AT4G08300	2.35652	20.3135	5.20769	19.8865
AT4G08590	3.74539	3.15636	3.97637	2.83777
AT4G08700	7.86202	8.03848	15.5769	10.0128
AT4G08810	13.5157	52.1428	23.4337	51.9797
AT4G08850	9.95609	31.2476	15.1095	26.2381
AT4G08874	2.60338	0	3.01556	1.557
AT4G08930	9.06464	18.8216	20.9227	23.8787
AT4G09030	77.2233	103.478	75.7629	124.28
AT4G09560	2.18517	11.3539	3.58344	10.503
AT4G09580	8.25309	17.9548	12.7843	20.6257
AT4G09630	9.97984	26.9062	15.3216	25.1542
AT4G09640	9.83316	13.859	15.0881	15.4251
AT4G09810	4.81702	8.86044	11.1449	11.1231
AT4G09970	30.049	17.5786	38.1137	19.1512
AT4G10080	105.795	90.4564	93.2622	93.6754
AT4G10140	17.1229	23.0692	23.9822	26.2625
AT4G10150	4.87275	12.8539	8.84348	10.0067
AT4G10170	36.8663	18.2463	39.148	25.4645
AT4G10330	17.7577	8.33024	24.4856	12.6928
AT4G10360	7.47131	38.7744	18.6642	35.9271
AT4G10380	4.77847	3.64226	6.03264	4.79567
AT4G10790	56.9647	68.8588	50.5143	58.1331
AT4G11000	4.17131	1.54889	6.07824	2.27183
AT4G11090	3.57079	14.8812	11.3369	13.6875
AT4G11220	19.4424	42.2004	26.6268	40.0296
AT4G11460	4.05758	8.2917	7.96064	7.47388
AT4G11680	11.3019	22.3704	16.0854	25.2794
AT4G11800	4.57474	11.5632	6.89578	9.17118
AT4G11900	4.16654	8.70291	7.77732	9.7548
AT4G11970	12.5412	12.1112	13.4602	10.1125
AT4G12000	2.54355	5.41158	4.84555	7.56417
AT4G12030	29.9313	20.7097	30.9699	23.1604
AT4G12110	6.2405	32.7482	11.6359	30.9695
AT4G12250	1.55481	12.1486	3.56198	12.9245
AT4G12300	7.03992	14.5134	13.3151	15.1031
AT4G12590	21.6269	66.1091	29.4251	61.4888
AT4G12650	13.9303	66.519	28.8072	63.0633
AT4G12680	4.53404	2.58893	5.32494	1.82012
AT4G12700	6.63659	15.2754	11.1835	15.5412
AT4G12800	1659.5	1325.92	1348.1	1474.39
AT4G12980	10.0548	51.5842	24.869	49.0892
AT4G13030	2.86015	2.91145	4.03847	2.98676
AT4G13195	22.2662	10.1027	30.819	13.9657
AT4G13220	95.7923	52.2232	94.3848	68.3403
AT4G13235	2.28439	5.2314	5.91357	3.89014
AT4G13250	171.464	170.403	133.136	159.92
AT4G13270	16.3402	32.958	24.9628	36.0366
AT4G13345	6.9196	9.45533	9.30094	8.13728
AT4G13510	29.1898	105.306	51.2914	108.428
AT4G13530	98.9399	95.2688	81.3496	86.6094
AT4G13590	121.909	113.909	112.225	117.883
AT4G13770	39.0149	97.1913	74.3143	98.7262
AT4G13970	11.8688	11.581	12.9896	11.4366
AT4G14230	16.1333	62.1656	27.4352	53.4141
AT4G14400	66.756	75.5632	76.4943	72.0712
AT4G14420	50.2961	83.0479	75.9395	93.2443
AT4G14455	31.2211	11.1117	48.0606	22.1403
AT4G14465	8.15996	6.86258	8.6767	6.99083
AT4G14500	36.4636	56.1178	68.9403	57.5212
AT4G14600	31.9367	15.3034	32.2385	20.5035
AT4G14690	23.6002	20.3771	15.2823	17.4972
AT4G14870	216.366	170.207	192.409	195.569
AT4G14920	18.5545	14.2929	16.7786	12.9868
AT4G14950	5.39445	17.8192	9.21696	15.8957
AT4G15080	8.23039	23.9062	13.6947	21.4585
AT4G15240	3.05617	10.857	8.20113	9.63834
AT4G15430	1.9232	7.41458	3.1736	6.74957
AT4G15470	47.8367	141.081	68.6458	141.633
AT4G15610	3.17743	11.3023	5.39137	10.0627
AT4G15820	21.5003	22.3334	15.3857	20.1301
AT4G15920	21.5634	57.7184	44.2501	62.8888
AT4G15975	2.68867	3.04613	3.52347	4.32775
AT4G16140	20.1816	65.559	27.6429	63.2362
AT4G16141	105.064	72.3716	130.637	78.7024
AT4G16370	31.7116	89.5074	55.115	85.4872
AT4G16410	233.045	128.983	259.364	180.466
AT4G16442	11.7122	36.933	17.5413	37.926
AT4G16444	13.4176	24.7334	18.6954	23.1633
AT4G16450	212.757	105.814	200.006	156.216
AT4G16480	5.69589	12.8009	10.9297	12.1193
AT4G16650	18.0714	32.5821	22.8808	34.0937
AT4G16695	143.512	55.9854	210.439	83.81
AT4G16790	6.87881	12.0722	7.75373	10.0896
AT4G16840	32.1247	12.7576	43.6818	19.5335
AT4G16850	4.27899	12.3373	8.246	13.5305
AT4G16980	365.121	529.592	329.513	570.428
AT4G17245	101.236	78.6442	107.87	96.2875
AT4G17250	8.4983	17.3053	15.0963	17.5514
AT4G17340	20.695	121.184	42.5321	130.153
AT4G17420	25.1343	17.1627	21.0914	18.3817
AT4G17430	1.75776	6.8268	3.87466	6.37193
AT4G17550	3.92766	14.2465	7.09529	13.5091
AT4G17790	12.8947	11.3366	21.1345	15.1735
AT4G17840	91.8286	65.0539	85.3606	68.6647
AT4G17970	7.22279	16.7001	14.4597	16.5222
AT4G18030	11.6721	66.2182	24.6076	60.4553
AT4G18160	9.05386	12.1524	14.7904	12.4421
AT4G18210	7.23415	6.58674	8.59037	8.61739
AT4G18230	9.84284	32.7485	24.8012	32.7901
AT4G18260	18.4896	13.898	16.2616	14.0259
AT4G18270	12.5313	10.5458	12.9154	10.5777
AT4G18290	5.03176	10.2597	8.42507	7.82662
AT4G18340	3.71141	13.2207	7.96639	10.9201
AT4G18425	2.33867	3.86973	2.44394	2.20818
AT4G18530	3.23092	7.15849	5.48595	6.95442
AT4G18640	2.44457	6.11186	3.40475	5.75638
AT4G18700	61.3513	47.1407	80.7017	51.73
AT4G18910	5.21217	21.4211	11.4953	20.7587
AT4G19070	26.7588	16.1717	33.8245	20.9548
AT4G19090	3.02766	1.37096	2.80912	1.26918
AT4G19100	159.99	129.614	138.119	134.493
AT4G19120	9.46873	46.8267	18.8166	40.1935
AT4G19140	6.92208	15.9122	19.3958	18.1298
AT4G19180	6.7087	10.1446	11.0739	10.5576
AT4G19185	5.08914	13.6701	7.89325	12.3522
AT4G19370	2.8888	2.88392	5.66536	2.29041
AT4G19390	44.2003	40.9101	50.6621	38.1642
AT4G19450	15.9382	38.953	29.7401	38.0774
AT4G19850	5.12369	4.99704	6.44937	3.42021
AT4G19960	7.95494	11.993	15.7996	12.8062
AT4G20140	2.66196	1.77652	3.22898	1.86998
AT4G20270	6.86075	22.1758	10.6052	21.0262
AT4G20310	6.38492	5.91615	10.3446	5.68371
AT4G20390	2.67927	4.05073	4.42539	4.57807
AT4G20870	41.9656	49.221	77.4905	60.4439
AT4G20880	19.6077	19.5665	26.0299	21.5814
AT4G20940	2.79473	11.2511	4.91467	9.34406
AT4G21060	2.10014	3.87489	4.10723	3.77424
AT4G21150	8.95964	42.5479	21.8695	40.4066
AT4G21215	40.6086	28.9456	37.7566	28.6741
AT4G21310	5.94029	6.66375	7.62064	6.76925
AT4G21400	3.51501	1.79932	4.6904	1.35621
AT4G21410	8.69338	13.6058	13.9763	13.2749
AT4G21500	4.62679	2.20671	7.35669	3.77135
AT4G21570	18.374	48.588	30.5149	49.5344
AT4G21700	1.81204	3.11364	2.81699	2.73762
AT4G21740	59.5041	70.327	62.4892	75.9511
AT4G21790	39.6587	59.5996	63.6895	59.1571
AT4G21900	11.083	12.2631	11.1178	10.2784
AT4G22120	1.76467	11.7864	5.32156	11.6577
AT4G22200	5.61363	16.5745	9.42158	14.2782
AT4G22260	39.7776	34.5641	46.7687	35.0266
AT4G22290	16.4047	40.0437	21.3354	37.2396
AT4G22300	25.7328	21.9933	26.9239	23.675
AT4G22330	32.787	46.5312	66.7938	49.782
AT4G22340	1.36304	9.83067	2.97221	9.40632
AT4G22550	17.0428	17.0486	19.4802	24.2554
AT4G22750	12.6288	31.5677	33.5561	37.6741
AT4G22753	9.1902	27.8593	22.4015	31.2192
AT4G22756	2.49739	20.3103	6.04556	18.8689
AT4G22830	115.022	80.7097	99.8075	91.4245
AT4G22840	6.03024	6.80577	4.97608	5.76728
AT4G22850	6.14102	10.8631	13.3295	13.1679
AT4G22990	13.2414	16.8891	16.7677	14.5568
AT4G23180	23.1033	47.2913	49.2899	46.3221
AT4G23190	2.86174	8.02049	8.12333	7.97396
AT4G23260	14.2914	10.7438	25.8303	11.4747
AT4G23290	33.1302	29.8386	33.8901	30.5432
AT4G23400	60.9614	176.888	121.05	180.052
AT4G23410	1.15624	4.58512	3.38746	4.94597
AT4G23470	102.174	73.5763	116.372	81.4819
AT4G23490	6.84296	14.571	12.9116	15.746
AT4G23630	42.3015	85.4666	49.5827	86.7152
AT4G23640	7.1474	35.1614	13.53	33.8238
AT4G23660	11.0766	8.03069	12.6402	7.74818
AT4G23740	10.0923	40.2526	19.4731	39.0993
AT4G23940	38.4519	43.9899	31.8697	40.0475
AT4G23950	2.36516	4.6516	5.75981	4.39955
AT4G24040	2.6383	7.3216	2.47875	4.75979
AT4G24090	98.3644	83.075	89.591	90.8485
AT4G24110	18.7194	14.1708	16.3617	15.9775
AT4G24120	2.80423	11.6357	7.78822	12.0982
AT4G24460	35.7896	35.7231	28.3367	33.1896
AT4G24520	46.6597	47.3596	62.0913	47.8416
AT4G24630	11.9163	16.4902	23.6062	18.9655
AT4G24920	299.944	141.808	303.404	216.412
AT4G24960	37.7685	79.2706	54.7343	81.4185
AT4G25030	113.686	107.199	104.909	108.45
AT4G25230	10.4085	18.6904	17.4527	20.6961
AT4G25360	5.36916	15.4825	9.95586	15.7417
AT4G25390	11.5772	9.90403	9.95584	10.1498
AT4G25450	37.6627	50.4726	32.3095	44.8813
AT4G25570	40.8599	176.956	80.6211	170.515
AT4G25640	22.3028	47.964	33.3735	45.2641
AT4G25650	104.863	108.734	84.589	105.329
AT4G25700	103.335	74.7484	100.5	87.3655
AT4G25720	10.2318	28.8686	23.4432	32.5611
AT4G25750	2.79318	3.4229	2.91072	2.35048
AT4G25760	9.91743	11.3282	17.8622	13.5472
AT4G25830	20.686	37.8087	38.4958	44.5292
AT4G25870	19.7674	25.6221	31.3052	28.3545
AT4G25960	7.28236	36.3326	12.8373	31.1134
AT4G26240	11.3713	19.1843	17.8834	22.9945
AT4G26540	15.2624	34.1398	21.1656	33.0114
AT4G26550	8.65405	18.1758	15.0101	17.3359
AT4G26590	2.50627	0.814364	3.18658	1.68041
AT4G26710	169.914	102.635	210.169	127.671
AT4G26990	6.4744	7.98277	4.98362	4.22881
AT4G27080	11.6515	34.3057	16.9561	36.3342
AT4G27300	8.25051	24.351	13.7963	21.0723
AT4G27390	66.9221	65.5059	56.2173	61.2967
AT4G27435	6.98278	12.5798	12.4001	15.1211
AT4G27470	54.7035	44.9714	38.3741	37.4962
AT4G27500	109.417	115.212	108.171	112.91
AT4G27520	53.0609	260.628	87.4554	245.935
AT4G27540	16.1515	13.3222	26.1509	16.5285
AT4G27610	32.5691	21.5588	44.3472	25.7165
AT4G27620	42.1968	33.5746	45.8776	39.1332
AT4G27630	2.74346	10.0164	6.64361	6.88006
AT4G27720	9.19476	40.3776	19.1849	40.5861
AT4G27730	1.97652	7.36114	3.78784	7.10725
AT4G27840	17.6447	12.8526	26.1158	14.2785
AT4G27860	4.38958	7.81157	6.60357	7.92789
AT4G27870	43.7048	49.2228	49.0337	51.534
AT4G27940	8.27345	8.51155	9.50303	9.03509
AT4G28100	15.027	57.6852	23.5406	52.1307
AT4G28210	65.1554	61.8629	63.3724	64.5943
AT4G28270	78.0706	42.4521	77.135	57.9131
AT4G28390	9.36095	7.31415	9.05342	8.44025
AT4G28430	2.75965	5.30164	3.77912	4.78763
AT4G28470	30.8238	37.7233	20.8805	29.604
AT4G28490	5.29461	7.31371	5.80015	7.20004
AT4G28570	7.17045	11.7776	7.675	11.109
AT4G28630	14.5172	10.225	19.7408	11.2881
AT4G28740	91.5808	61.7882	85.6369	71.419
AT4G29020	83.8404	144.399	110.872	159.274
AT4G29030	49.2446	130.459	64.1722	138.968
AT4G29140	11.6793	29.1965	12.639	28.3181
AT4G29330	10.7653	50.8399	19.8196	47.6634
AT4G29360	3.07638	14.8934	7.56531	12.3609
AT4G29660	41.1621	21.1629	38.8506	25.8696
AT4G29680	3.64313	23.6191	8.00104	22.3963
AT4G29870	26.3723	49.8145	45.6022	56.9768
AT4G29960	23.0833	31.2119	34.7207	32.7082
AT4G30060	2.67	7.06374	5.95285	6.98845
AT4G30110	4.38305	5.47853	6.1035	5.23405
AT4G30140	11.1942	85.9825	22.7904	83.0017
AT4G30190	35.1136	81.5026	55.3364	75.5273
AT4G30210	52.0295	63.6689	62.6051	59.533
AT4G30240	23.2177	17.1587	25.1502	18.7196
AT4G30260	34.6778	56.9061	32.8076	56.5604
AT4G30360	3.72395	10.0118	6.99449	9.34298
AT4G30370	5.68131	6.92694	9.66498	7.33925
AT4G30400	6.48702	19.7664	10.2362	17.9245
AT4G30440	66.8344	165.556	110.59	169.443
AT4G30450	4.07039	4.17026	2.70114	4.40139
AT4G30520	4.11995	6.78209	6.81983	6.04213
AT4G30560	2.93216	6.29403	4.28215	6.75988
AT4G30580	83.3578	65.8223	100.49	72.4457
AT4G30650	250.129	138.055	241.646	176.529
AT4G30660	295.253	181.936	284.148	209.978
AT4G30850	10.4135	11.1663	18.2657	14.6782
AT4G30950	221.361	191.765	267.134	210.961
AT4G31040	74.9867	48.478	90.7868	55.0331
AT4G31130	12.0555	39.9117	15.1751	43.4362
AT4G31140	3.03249	16.4246	6.96553	15.9052
AT4G31330	1.28939	5.16066	2.67583	6.02211
AT4G31340	29.5495	70.5299	58.3829	75.4795
AT4G31570	8.37367	7.38173	5.84151	5.92543
AT4G31600	5.84852	6.65879	8.51762	10.4093
AT4G31730	10.1637	16.671	13.4001	14.8072
AT4G31840	40.3884	95.5755	50.7458	98.9319
AT4G32140	6.6235	18.2261	13.3573	20.0198
AT4G32150	121.415	79.5456	159.772	97.0622
AT4G32300	9.69882	19.7089	17.1571	19.6343
AT4G32410	50.7166	104.823	66.8299	94.5515
AT4G32530	38.1359	82.1249	56.11	89.8423
AT4G32600	21.3081	38.1072	27.9964	35.1006
AT4G32670	2.13535	4.549	2.87446	3.6858
AT4G32680	31.8884	31.4401	38.5929	33.7786
AT4G32750	4.99301	13.8793	9.92123	12.2231
AT4G32790	4.93053	8.70233	11.0766	10.8939
AT4G32900	70.1606	53.0994	58.0409	53.7277
AT4G32920	5.70953	7.88634	7.72072	6.11964
AT4G33380	52.2627	56.5485	73.421	65.036
AT4G33410	9.16191	20.46	17.0471	21.8119
AT4G33430	10.7605	41.3891	19.7048	39.71
AT4G33520	114.835	98.9074	104.85	103.56
AT4G33625	53.746	113.9	59.6803	102.092
AT4G33700	9.5152	41.1125	19.9433	36.376
AT4G33740	12.2967	46.9814	21.2973	44.7015
AT4G33780	37.5893	19.6747	40.5401	30.6917
AT4G33940	54.3347	33.5198	53.8567	42.2023
AT4G34100	12.0339	37.3189	17.406	34.301
AT4G34190	440.263	306.747	438.061	354.677
AT4G34220	18.7771	47.282	29.3824	47.5775
AT4G34250	8.6414	41.2645	14.318	38.8413
AT4G34500	4.10666	13.1642	7.51767	11.7687
AT4G34560	20.9148	17.6832	30.5348	23.5591
AT4G34640	66.6215	52.3793	78.4137	57.1763
AT4G34720	96.7304	167.852	125.166	179.46
AT4G34950	43.8827	135.33	61.3162	123.659
AT4G35080	48.7496	39.138	55.3512	43.5299
AT4G35100	141.07	384.026	211.417	396.829
AT4G35290	2.33165	4.4407	5.18997	4.90766
AT4G35300	14.5772	27.3093	24.2179	24.4211
AT4G35480	9.10984	29.4464	11.3426	27.0815
AT4G35530	8.31752	8.58375	11.6899	9.80201
AT4G35580	49.6465	49.3981	32.6585	39.8459
AT4G35760	57.6474	41.9794	64.9719	48.2536
AT4G35840	4.9629	15.0688	7.22348	13.4207
AT4G35870	2.48599	9.35662	3.6891	9.30885
AT4G35880	7.15989	25.44	10.841	21.51
AT4G35970	6.80374	6.48334	8.28844	7.27822
AT4G36010	5.13833	13.5834	12.7448	15.9536
AT4G36140	4.81058	5.57835	6.90713	5.35412
AT4G36150	3.50741	3.48268	3.15819	3.22859
AT4G36180	2.69797	16.4758	4.57791	15.2558
AT4G36210	52.146	42.7149	47.3398	42.8793
AT4G36380	2.66262	7.30302	5.08628	5.85173
AT4G36440	6.99757	16.9084	18.0776	17.787
AT4G36660	21.0976	50.1179	28.6783	49.3711
AT4G36670	7.65914	28.0117	15.1084	27.7313
AT4G36790	5.82821	12.0168	11.3558	13.3402
AT4G36830	1.43996	4.36872	2.50703	4.13978
AT4G36850	45.4278	81.8054	69.9477	81.6988
AT4G36890	7.6617	20.3031	13.4548	16.3567
AT4G37220	2.56397	8.34671	5.78888	5.82018
AT4G37640	5.36057	18.0383	6.44077	15.8853
AT4G37760	13.2598	33.5919	25.565	36.5226
AT4G37820	10.7391	27.6788	16.6897	26.9472
AT4G38050	3.23399	3.32818	5.30365	3.74738
AT4G38100	79.844	38.8099	79.3916	55.336
AT4G38380	4.89516	7.08936	3.93715	6.02727
AT4G38490	46.7337	25.9203	64.9582	32.7975
AT4G38640	9.65295	23.5327	14.5193	23.9325
AT4G38660	7.80903	41.5129	11.5198	41.4901
AT4G38730	6.59094	14.5249	13.7123	12.581
AT4G38790	4.23669	34.4938	11.2299	30.101
AT4G38920	88.6383	126.702	147.008	151.222
AT4G39180	8.67171	6.782	7.72202	7.00214
AT4G39190	4.5933	6.48203	7.48438	7.37001
AT4G39270	10.5253	8.05804	13.8533	10.4709
AT4G39370	9.42277	7.405	11.3635	7.5958
AT4G39390	6.61856	13.737	16.8122	16.9404
AT4G39400	17.9703	60.5156	25.7894	51.677
AT4G39460	84.1513	65.9596	107.693	73.4334
AT4G39510	3.89137	18.8847	7.27401	17.8627
AT4G39840	4.66894	38.1782	10.394	36.5117
AT4G39950	6.39676	29.0244	13.1459	27.1221
AT4G40042	12.2187	12.7059	20.1413	15.7303
AT4G40045	88.7309	44.9325	104.378	49.7078
AT5G01090	8.11683	39.4344	16.8065	40.0799
AT5G01240	24.2463	54.8431	36.3121	54.1567
AT5G01450	7.64275	6.50167	11.9802	7.92337
AT5G01460	7.66242	40.8569	12.6581	38.3276
AT5G01560	15.1579	9.41386	23.0682	9.86836
AT5G01890	3.95323	13.9972	5.27423	11.7639
AT5G01950	8.24721	8.94965	13.5558	9.01087
AT5G01960	14.2587	26.8711	17.5521	25.9276
AT5G01980	33.3962	24.8412	34.9399	25.7996
AT5G01990	4.63501	19.2502	7.0356	19.7784
AT5G02040	9.46363	20.3659	12.0069	23.1186
AT5G02060	7.5366	3.51465	6.70617	4.61762
AT5G02160	663.058	440.047	579.551	500.872
AT5G02180	9.33119	12.1982	12.7507	10.4044
AT5G02620	21.2814	20.7534	30.3722	21.7552
AT5G02630	1.6172	5.03789	4.44528	5.65863
AT5G03080	8.72381	34.7642	17.5731	29.3586
AT5G03140	10.7362	13.4559	14.6063	15.6041
AT5G03180	8.41437	8.80849	10.808	8.77071
AT5G03280	11.2847	27.1191	13.5359	24.6378
AT5G03545	15.9389	6.5635	44.9748	10.0772
AT5G03555	24.5771	29.0701	24.6037	29.4108
AT5G03700	5.22992	7.79783	6.87854	7.27557
AT5G03900	57.7647	58.0682	45.1879	53.6783
AT5G03910	42.9714	39.9567	35.8845	37.6601
AT5G04160	5.61363	29.1899	9.0929	29.6434
AT5G04270	4.13616	12.3811	11.581	13.4048
AT5G04490	71.1444	71.6495	65.6392	73.4998
AT5G04620	19.5273	13.059	19.3843	13.2673
AT5G04890	15.7404	18.115	11.7352	15.9829
AT5G04930	11.1019	22.1719	13.6093	19.8463
AT5G05160	2.69567	11.397	6.24153	9.01063
AT5G05170	49.0388	98.1185	72.0384	91.5978
AT5G05310	4.82769	3.63805	7.11982	3.34661
AT5G05380	7.81004	9.9191	11.7863	13.0325
AT5G05580	93.0452	105.931	69.017	95.0591
AT5G05660	24.399	17.4175	21.3046	19.012
AT5G05670	10.2801	22.7982	19.2358	27.9379
AT5G05690	59.3058	136.889	103.766	135.328
AT5G05740	106.159	108.938	81.4519	99.5352
AT5G05830	29.0312	14.8021	33.0397	18.7679
AT5G05950	25.1693	32.5724	40.238	42.6099
AT5G06130	127.326	97.3588	107.274	105.925
AT5G06190	25.149	7.15217	29.5644	11.9898
AT5G06320	81.3929	247.215	116.212	247.909
AT5G06330	1.24019	3.71052	2.23017	3.81787
AT5G06530	18.154	25.8057	25.0207	23.9922
AT5G06560	25.2459	19.826	26.5201	21.1218
AT5G06660	17.3624	26.6913	32.1117	33.0438
AT5G06700	18.3973	91.8517	27.312	83.886
AT5G06850	7.90862	9.2108	7.3562	8.3793
AT5G07110	11.3754	29.3782	14.9576	27.1946
AT5G07150	8.18747	3.88855	10.5468	3.8932
AT5G07180	2.51313	7.19105	4.09215	5.64689
AT5G07340	7.75726	44.2059	12.8551	39.7727
AT5G07630	7.95978	10.8647	18.1201	9.51984
AT5G07730	16.6076	9.60255	14.3431	10.7443
AT5G07920	3.5465	8.32533	4.49439	8.32841
AT5G07960	109.156	49.6502	120.496	71.6497
AT5G08050	360.515	277.624	316.683	299.375
AT5G08080	43.8047	54.1171	41.3468	47.511
AT5G08240	5.76431	4.16608	6.06597	5.30221
AT5G08335	7.04716	21.4329	14.3776	19.4506
AT5G08390	14.0927	8.97505	12.1781	8.89266
AT5G08500	6.82073	14.3073	14.6704	15.5442
AT5G09220	68.8217	47.4818	128.193	62.2113
AT5G09310	52.0561	32.7348	60.1268	42.5087
AT5G09400	8.36165	17.4056	12.0255	15.5741
AT5G09690	4.14121	2.7741	6.06616	2.177
AT5G09870	18.8406	42.4386	26.3439	38.0042
AT5G09995	71.0128	42.1072	69.1277	49.2657
AT5G10020	6.57262	21.5765	10.9294	18.6668
AT5G10180	35.8005	48.1845	54.5572	45.7177
AT5G10190	9.40763	17.798	21.0674	20.714
AT5G10380	10.8667	15.3548	20.0595	16.6556
AT5G10430	109.918	96.6695	94.5567	104.978
AT5G10480	36.7462	116.475	68.8951	115.867
AT5G10530	3.83913	1.43594	6.17125	1.10132
AT5G10780	123.069	107.868	120.012	111.328
AT5G11150	49.9107	36.2988	43.8983	40.7984
AT5G11280	16.3039	36.4499	35.4542	48.3905
AT5G11390	14.3697	16.3715	13.812	14.277
AT5G11560	9.5676	64.7678	16.7386	59.7869
AT5G11640	16.5212	29.058	30.1099	29.0671
AT5G11650	10.5622	23.5376	27.1171	23.2229
AT5G11690	48.651	23.7003	48.8866	33.2528
AT5G11740	575.964	295.586	596.81	416.971
AT5G11790	82.799	55.0831	90.258	59.7766
AT5G11800	6.27291	9.5052	12.6403	10.0377
AT5G11840	94.91	60.8541	92.6314	72.1201
[truncated: 444 more rows]

## Sheet: Table S3.3
Supplementary File 3. Transcript levels in microsome, cytosol, free polysome and membrane-bound polysome fractions as determined by RNA-seq
Notes: Tables 3.1, 3.2, and 3.3 are in three layers. FP: free polysome; MBP: membrane-bound polysome; cytosol: soluble fraction; microsome: membrane fracton
Gene expression values are in FPKM (fragments per kb per million).
Supplementary File 3.3. A list of known and predicted miRNA target genes
Gene_ID	FP	MBP	cytosol	Microsome
AT1G01040	11.8212	6.92746	10.4741	6.26467
AT1G01080	141.21	124.375	119.786	121.911
AT1G01240	45.8736	26.2974	52.4439	32.6722
AT1G01320	84.9431	96.6467	75.4668	84.904
AT1G01560	2.84337	2.43556	3.9383	2.28205
AT1G01620	95.2945	293.322	146.712	291.777
AT1G02020	17.3905	24.3132	15.5267	18.5114
AT1G02130	92.3234	65.2315	81.6286	77.9232
AT1G02800	1.19953	6.07093	2.27559	5.36931
AT1G02840	115.417	100.89	111.596	94.657
AT1G02860	16.8797	13.7516	13.9311	14.0811
AT1G03060	8.16302	10.4671	6.36604	8.17043
AT1G03360	19.3894	18.1471	18.542	18.2213
AT1G03495	5.21515	3.39814	9.33173	4.31533
AT1G03660	6.50097	3.42085	7.15376	3.31791
AT1G03940	4.60175	3.6105	7.32874	3.70055
AT1G04010	3.07314	4.55006	5.23142	3.97796
AT1G04210	18.967	17.7407	19.8084	16.3173
AT1G05150	28.4455	30.1208	26.3254	28.5519
AT1G05680	6.76167	9.49587	4.4115	7.08455
AT1G06150	4.5392	5.02584	4.40267	4.93407
AT1G06180	28.4096	20.4396	34.4171	19.2398
AT1G06580	2.3652	1.38638	4.56821	1.70728
AT1G06770	10.7148	10.5509	10.6468	9.19009
AT1G06900	20.4791	20.3781	20.6742	17.693
AT1G07010	86.3981	74.2021	85.2204	72.3826
AT1G07610	77.6983	26.3174	87.699	50.1662
AT1G08310	3.68998	2.45478	2.9716	2.44344
AT1G08760	16.472	16.2689	17.4535	14.576
AT1G08970	107.6	90.4683	94.2019	97.2134
AT1G09240	12.8406	11.0451	8.73639	11.9451
AT1G09280	16.2447	12.1802	21.172	13.1497
AT1G09730	19.8169	16.6454	20.442	16.1104
AT1G10700	35.7222	34.0016	33.1175	32.2687
AT1G11200	3.39481	24.0728	6.5201	22.8759
AT1G12220	6.21685	5.04689	6.26885	4.91691
AT1G12300	2.30969	2.33392	3.07354	2.45082
AT1G12480	4.08492	6.18527	7.67984	6.30805
AT1G12620	7.34461	5.38088	9.18678	5.30704
AT1G12775	4.70639	5.10276	4.53784	4.07582
AT1G12820	51.3298	44.9993	58.6716	43.8139
AT1G12930	10.8454	9.68122	10.6044	7.62253
AT1G13470	3.60676	3.34818	2.89185	2.77187
AT1G13960	33.1126	28.6461	32.8038	26.1676
AT1G14200	51.4488	36.9742	54.5492	41.8421
AT1G14510	79.5645	61.7949	74.5335	69.9053
AT1G14685	65.5601	44.2462	87.09	53.8709
AT1G14840	37.8882	39.3968	34.5001	34.3743
AT1G15125	198.679	175.481	193.783	182.355
AT1G15530	8.27004	22.4355	11.9267	20.4274
AT1G15570	23.2223	18.307	25.5393	16.5179
AT1G15690	77.0858	226.914	137.921	216.72
AT1G15750	58.0483	59.2481	51.9739	51.8342
AT1G15780	16.199	24.9379	10.712	18.5107
AT1G15890	2.78068	2.95622	3.47	2.85204
AT1G16300	9.55101	7.94607	9.24249	7.73384
AT1G16320	115.143	76.0825	118.087	89.4243
AT1G16720	172.179	169.353	145.823	156.621
AT1G16800	2.52772	2.57611	2.26322	2.10937
AT1G17180	4.10674	3.59957	3.97754	3.94835
AT1G17370	74.519	77.1399	74.7447	76.1756
AT1G17455	19.1657	7.43174	38.8507	16.2991
AT1G17590	10.4619	4.42141	9.6096	5.20396
AT1G17760	18.9183	18.5472	14.3862	15.2471
AT1G18090	8.46126	11.1371	9.71769	10.4455
AT1G18370	15.6174	22.0196	11.9108	15.9909
AT1G18670	10.8046	10.2628	13.0315	9.28307
AT1G18870	7.22926	8.02753	4.81838	5.77737
AT1G19220	4.67163	5.96004	3.72479	5.42825
AT1G19430	3.68646	19.5851	4.60828	17.4121
AT1G19540	10.7171	6.13611	11.1171	5.95342
AT1G19580	46.2818	46.8413	42.3545	50.1019
AT1G19980	10.2254	9.4946	11.1552	8.47099
AT1G20225	17.1848	54.4115	27.2379	62.9347
AT1G20450	182.167	180.86	146.469	169.418
AT1G20640	18.4524	15.5957	19.9687	16.5622
AT1G20910	22.3361	24.3917	20.4258	20.4449
AT1G20970	35.3401	40.4172	30.9859	32.6361
AT1G21270	9.70621	32.7866	21.6502	31.7356
AT1G21460	6.7922	49.1984	15.9352	43.5163
AT1G21650	10.7225	14.2728	6.92471	10.5106
AT1G22040	11.1993	9.8171	15.323	12.0073
AT1G22180	13.7355	10.5204	22.5731	11.5768
AT1G22960	4.11031	3.8356	6.32796	3.10729
AT1G23020	16.6377	27.0631	27.4078	27.2796
AT1G23410	67.4807	31.8816	61.6225	43.0583
AT1G24050	72.1211	45.4952	85.733	58.9479
AT1G24140	4.37609	7.47588	6.67351	7.61745
AT1G25350	52.5568	62.3694	43.3754	49.0601
AT1G25550	121.568	108.57	144.353	118.916
AT1G26450	6.98245	14.7894	9.93798	15.2555
AT1G26580	50.6713	27.2298	64.0751	30.4643
AT1G26620	11.8237	10.8625	13.9095	10.5695
AT1G26850	23.7736	117.332	45.6901	113.222
AT1G27340	47.2592	25.2368	61.4419	32.5798
AT1G27360	14.1171	8.19603	15.6173	9.64022
AT1G27370	10.7912	6.31036	23.5647	8.38357
AT1G27680	23.7115	25.2492	14.7723	20.4432
AT1G27750	11.0287	11.9081	9.63325	10.5323
AT1G29240	8.32305	7.07355	6.96032	7.31136
AT1G29300	8.89404	7.19613	7.46911	7.19791
AT1G30330	32.1403	34.456	27.0165	29.8517
AT1G30400	9.48245	34.0207	15.2811	28.0106
AT1G30490	19.3833	11.9096	19.1372	12.7115
AT1G30690	65.9767	85.8736	54.6972	72.0761
AT1G30970	42.004	28.4151	31.9808	29.478
AT1G31280	9.63807	10.9442	7.35194	8.09292
AT1G31300	36.2243	38.9827	42.2233	42.8854
AT1G32080	202.463	207.84	178.231	207.798
AT1G32340	15.5295	15.2069	14.608	13.3008
AT1G32360	57.1495	40.5273	53.5149	47.1683
AT1G32370	40.8356	16.9018	58.104	29.9887
AT1G32630	18.4409	15.763	16.9388	14.0595
AT1G33120	74.0106	50.4629	79.13	58.6485
AT1G33140	101.064	61.4894	110.203	85.5685
AT1G33350	3.16773	2.11149	3.43558	1.8088
AT1G33790	9.46782	10.8279	7.16236	9.24528
AT1G35115	23.347	18.872	19.48	15.1144
AT1G35660	5.0269	5.25669	4.55286	4.27241
AT1G42550	90.6613	87.0103	81.8206	81.0252
AT1G44900	13.4746	17.3036	10.9855	13.8266
AT1G45130	2.91019	23.5695	5.90923	19.4727
AT1G47440	2.69491	0.819245	3.25021	1.49642
AT1G48040	8.19764	7.57915	8.2531	8.43501
AT1G48090	5.54555	6.82576	3.52876	4.57277
AT1G48410	64.4606	76.6964	51.9156	61.4968
AT1G48760	16.4415	16.7192	15.5698	15.9237
AT1G49560	20.8321	17.442	23.2392	14.8153
AT1G49870	6.73143	9.10825	5.74814	7.62467
AT1G49880	32.1712	18.6132	29.0025	25.219
AT1G49910	8.07233	6.9917	4.24719	5.23691
AT1G50030	8.22903	11.6893	6.66746	7.57815
AT1G50055	15.21	6.442	35.0101	10.8098
AT1G50732	81.8065	35.1547	105.841	58.7828
AT1G51630	5.00267	31.6838	16.0283	33.2187
AT1G51805	17.2951	56.5386	31.9475	45.3797
AT1G51940	12.5103	38.6347	25.6597	37.037
AT1G52100	19.5977	25.4503	17.3466	22.0053
AT1G52380	31.0806	34.6278	29.7184	33.6972
AT1G52400	14.6124	112.816	34.3239	108.825
AT1G52500	20.095	18.1258	22.071	15.7729
AT1G52590	81.908	48.6394	83.1024	64.179
AT1G52770	11.9209	12.36	12.1938	11.672
AT1G52827	77.6404	16.2382	77.6162	33.4509
AT1G53160	28.1582	11.9018	25.8757	16.2338
AT1G53230	64.9058	43.6511	64.062	49.9816
AT1G53290	7.11408	16.9858	16.5339	20.3908
AT1G53450	20.6242	16.1065	21.6236	16.2424
AT1G53700	3.99991	3.98301	4.3317	3.71334
AT1G53770	5.90219	13.5341	12.0166	15.6693
AT1G54160	5.67117	4.16161	5.52234	3.27664
AT1G54170	28.1822	32.6158	23.4418	26.562
AT1G54380	18.538	12.3439	16.8403	12.4352
AT1G54710	11.1688	13.7086	11.608	11.5137
AT1G55250	23.4427	19.5415	18.2424	16.2768
AT1G56010	20.4336	13.4276	22.0872	14.402
AT1G56450	148.347	130.792	120.467	135.465
AT1G56520	9.20516	7.93403	10.8873	7.87991
AT1G56650	9.90808	4.60321	7.02063	6.06462
AT1G57620	12.8472	43.5463	20.6238	47.3384
AT1G57765	41.1466	22.7291	46.1011	36.0806
AT1G57820	30.2373	33.3889	25.3797	27.7803
AT1G58235	28.2016	10.6294	60.7728	15.8226
AT1G58602	54.0456	47.5	56.8425	43.4713
AT1G60430	21.6558	17.3481	21.3119	20.4396
AT1G60550	111.001	70.2657	115.152	83.787
AT1G61140	9.97541	8.6876	9.44118	7.78864
AT1G61180	7.88077	9.94538	8.77312	7.99364
AT1G61190	33.1481	42.3903	34.8132	39.2456
AT1G61210	10.9378	10.6049	9.82995	8.98233
AT1G61260	7.9088	11.8864	12.3111	11.5237
AT1G61310	2.39259	3.24897	3.73609	3.21685
AT1G61500	5.20579	2.50045	3.98818	1.85941
AT1G62260	2.26039	2.15716	1.60276	1.74523
AT1G62630	11.0941	13.1262	12.3444	12.9445
AT1G62670	2.89189	3.06931	2.54659	3.03417
AT1G62860	3.87595	1.75024	5.67678	1.96627
AT1G62914	2.55601	2.19501	3.05517	1.78851
AT1G62930	4.27223	3.45231	3.62414	2.72409
AT1G63130	6.87702	7.55085	7.22714	7.08064
AT1G63150	2.81446	2.92031	3.32091	1.70468
AT1G63230	2.23888	0.919006	3.88829	1.397
AT1G63250	2.07855	2.51139	3.126	2.4555
AT1G63360	25.8245	31.7048	26.7176	28.802
AT1G63640	15.8925	15.7151	11.6388	12.7902
AT1G64080	8.80026	6.52914	11.13	7.80315
AT1G64150	74.1429	71.8412	55.7016	65.6621
AT1G64580	6.71997	4.16805	9.00062	5.67305
AT1G65250	6.27186	4.47902	5.35504	4.76271
AT1G65370	14.298	5.52012	29.3261	5.33993
AT1G65380	2.17688	8.41387	3.0084	6.88167
AT1G66230	22.0599	18.1176	27.9755	18.687
AT1G66240	349.199	187.427	334.373	251.028
AT1G66540	5.95253	4.8377	10.2583	6.48639
AT1G66670	208.222	197.383	174.754	202.304
AT1G66690	2.61519	0.606615	3.9394	1.06427
AT1G66880	5.47585	7.75449	8.79369	8.80608
AT1G67040	9.60005	10.8022	9.4018	8.86423
AT1G67070	4.5882	4.40051	5.68699	4.26044
AT1G67230	43.7339	38.4461	37.0461	45.7525
AT1G67325	50.9207	46.6468	49.0014	44.7417
AT1G67580	27.9466	25.5261	29.2442	23.3089
AT1G67630	14.4256	15.5255	11.1572	12.0954
AT1G68140	39.5699	31.7679	55.1527	35.9144
AT1G68560	20.6065	104.501	35.089	100.829
AT1G68820	2.78771	12.2763	6.14539	9.23475
AT1G69170	7.00631	4.11926	11.3359	5.69758
AT1G69220	30.2396	28.5663	24.5758	23.873
AT1G69270	3.19088	10.8181	5.73333	9.94978
AT1G69490	23.5161	19.969	22.7362	19.6423
AT1G69550	3.61279	8.19094	6.39487	7.48293
AT1G69740	195.013	223.952	149.983	196.937
AT1G69770	17.1739	16.598	13.8696	14.2453
AT1G69980	18.3762	41.4513	32.4044	44.6123
AT1G70070	22.3726	30.6564	22.8194	25.8214
AT1G70430	3.38724	1.46763	4.44252	1.73685
AT1G70470	8.20601	17.9615	12.8112	17.2333
AT1G70780	200.6	115.734	214.31	160.186
AT1G70885	5.01317	3.0989	7.50245	2.64192
AT1G70900	57.2639	27.2924	84.2349	37.9999
AT1G71040	9.30098	35.1371	17.0341	33.9388
AT1G71060	6.3775	7.72359	5.35086	5.45282
AT1G71910	4.11396	2.87038	5.31878	3.065
AT1G71990	4.31159	4.86916	9.11867	7.12783
AT1G72180	9.62476	27.4381	15.1828	28.495
AT1G72270	19.0793	14.0303	20.4372	15.1728
AT1G72360	16.9182	16.3605	16.2707	13.2321
AT1G72830	9.56032	6.91812	9.81382	8.20291
AT1G72990	2.03646	3.17738	4.03504	3.16714
AT1G73360	3.63945	2.7555	4.29178	3.24548
AT1G73440	19.7341	11.8952	17.2761	14.0578
AT1G73500	52.5882	46.0006	57.3483	53.79
AT1G73590	1.90828	12.4407	3.72615	10.4568
AT1G73750	23.7115	21.5609	22.6584	18.3646
AT1G73820	57.269	30.7908	63.0668	44.4228
AT1G73960	14.8173	14.3375	13.779	11.7407
AT1G74260	26.5401	32.6285	23.5095	28.5749
AT1G74790	5.14332	17.0259	9.6112	17.0568
AT1G74840	100.644	80.2313	111.975	87.1634
AT1G75010	21.1337	15.2509	21.8016	14.4707
AT1G75750	262.225	379.812	302.634	427.189
AT1G76140	42.3159	57.4156	38.0644	47.6741
AT1G76160	47.1548	128.381	87.8802	127.921
AT1G76260	16.3119	13.1559	13.4938	10.0671
AT1G76280	9.09703	7.21624	12.3723	7.0917
AT1G76878	45.3645	41.4333	62.9306	46.5836
AT1G76900	35.4907	27.4899	53.6008	34.1836
AT1G77145	6.12178	4.40683	5.00174	4.65585
AT1G77360	2.29098	1.94062	2.85387	2.06117
AT1G77550	12.3752	14.4334	8.46194	11.1197
AT1G77660	5.77923	6.22712	11.6801	7.11012
AT1G77680	14.9848	10.6608	19.8348	11.7704
AT1G77850	11.876	6.53298	18.3795	8.76109
AT1G78050	7.17899	8.84363	6.10776	7.02177
AT1G78130	5.22171	2.75669	11.3417	3.80056
AT1G78420	31.8627	23.7336	35.7841	25.5821
AT1G79470	10.4176	11.6436	8.9005	11.4201
AT1G79490	5.51414	6.29079	6.06892	5.49826
AT1G79500	37.1239	30.0537	33.7728	28.6576
AT1G79529	13.0428	1.7852	12.1437	2.89726
AT1G79530	27.6366	27.6835	26.3862	26.5683
AT1G79640	9.72727	9.88469	6.39711	7.13348
AT1G79750	97.7797	94.7631	98.9914	86.2469
AT1G79920	63.0864	71.8347	53.9707	63.286
AT1G79930	56.6068	57.6406	51.4584	50.7476
AT1G79940	13.5713	48.4282	24.7143	43.5042
AT1G80370	11.4155	10.2902	10.6729	8.69392
AT1G80490	28.0113	30.515	23.2905	25.5236
AT2G01350	95.5614	89.0368	69.2648	77.797
AT2G02810	7.41706	15.2783	23.1502	15.176
AT2G02850	3.49348	3.44272	5.605	5.08079
AT2G02860	7.58375	16.8571	14.2261	13.3707
AT2G03070	25.8399	24.1942	17.0087	20.0378
AT2G03220	3.79559	11.5938	10.4238	13.3888
AT2G03410	2.96991	1.80676	5.97364	1.76815
AT2G03750	78.952	84.5067	78.0009	84.4022
AT2G04110	51.1091	23.3652	74.5866	33.2932
AT2G04842	126.617	141.153	108.659	129.673
AT2G05120	7.62699	11.3729	5.34867	8.34494
AT2G05170	25.9975	32.743	21.5281	28.3904
AT2G06990	15.5234	21.4096	11.9824	14.0205
AT2G13130	3.88441	2.05462	5.29689	2.57636
AT2G13370	16.7823	16.2932	12.6388	12.7595
AT2G13690	20.9796	21.5423	15.609	17.631
AT2G15630	2.26261	2.78078	2.38781	1.76694
AT2G16500	84.3168	53.0074	92.3265	60.4474
AT2G17787	16.3693	10.8095	21.2358	11.5121
AT2G18710	95.08	87.4999	97.3804	90.9949
AT2G18780	3.58848	2.84419	2.69783	3.42313
AT2G19530	6.69313	7.54817	9.20522	6.93325
AT2G19870	35.0816	31.8143	32.6036	32.6825
AT2G20000	14.9634	14.9864	12.4737	13.9852
AT2G20340	20.99	24.2773	20.3609	21.8089
AT2G20900	47.3535	39.4191	39.0149	36.1389
AT2G21230	31.5329	29.0427	29.0038	29.2537
AT2G21330	481.111	497.616	463.5	479.529
AT2G21520	67.9656	64.4773	69.3241	60.1076
AT2G21530	286.979	190.893	279.919	232.936
AT2G22570	14.0834	7.60488	11.1487	8.63255
AT2G22740	16.0506	18.8147	13.5789	15.3923
AT2G23180	0.978207	7.66481	2.86293	6.68336
AT2G23560	19.4281	12.3506	16.1068	12.8929
AT2G23610	71.0136	49.5369	71.7669	57.701
AT2G23760	42.6724	37.7047	41.5174	38.9302
AT2G23820	102.647	95.4874	79.8153	93.9824
AT2G24550	125.276	106.774	129.768	107.941
AT2G25300	5.12436	8.32261	7.59908	8.22498
AT2G25520	32.7881	46.5278	69.6626	53.1246
AT2G25605	53.1396	36.849	50.5122	43.0013
AT2G25610	20.0126	42.6609	31.8115	52.3521
AT2G26530	54.2067	43.1675	56.7577	49.8582
AT2G26650	3.56435	6.65201	8.05229	6.61253
AT2G26890	8.3132	12.9841	6.26572	9.578
AT2G26900	160.149	176.999	143.27	168.292
AT2G27100	47.9419	52.81	37.0137	46.25
AT2G27400	13.7958	3.81756	32.4647	11.0504
AT2G27500	24.1625	26.7825	55.0591	32.9027
AT2G28100	5.55253	22.959	14.2258	22.0101
AT2G28150	31.2407	23.9477	36.2479	24.7484
AT2G28250	2.04806	5.6788	4.54072	4.5111
AT2G28260	2.64841	5.3518	7.36504	5.70919
AT2G28350	19.5843	18.1205	23.3887	16.4633
AT2G28510	28.054	17.215	32.955	22.1687
AT2G28550	80.8242	56.2168	97.4993	60.2266
AT2G28600	23.715	19.8038	24.2182	20.6021
AT2G28830	3.26934	3.38622	4.3038	3.44359
AT2G29065	2.74683	2.86726	3.49808	2.58866
AT2G29980	82.5991	84.8944	133.846	88.0532
AT2G30070	10.8301	15.2281	24.5962	16.1055
AT2G31070	45.6108	36.2713	40.7525	39.2072
AT2G31280	22.378	15.2381	17.2133	12.3943
AT2G32000	17.2772	17.2262	18.3231	15.5511
AT2G32120	2.5549	2.88661	2.20045	3.03065
AT2G32530	2.70302	8.79852	7.24226	7.91777
AT2G32630	3.83349	4.30984	2.71589	2.60109
AT2G33210	28.5742	44.1991	21.0272	35.349
AT2G33250	70.1233	47.6804	104.477	54.9796
AT2G33400	28.2785	20.7017	29.3063	21.4561
AT2G33490	22.3428	19.8955	24.0789	17.7232
AT2G33580	2.24659	9.39322	3.44029	7.76753
AT2G33770	36.6036	32.3453	31.6928	29.6512
AT2G33810	14.8982	6.05434	27.6126	7.37585
AT2G34010	4.40726	2.64014	9.69921	2.93751
AT2G34060	8.48369	12.1938	14.284	14.8932
AT2G34530	2.20531	2.66646	3.45332	3.39047
AT2G34585	54.8881	41.7151	75.1406	49.0333
AT2G34710	24.5635	19.4992	23.9736	17.6451
AT2G34900	29.2429	30.7407	40.9732	28.9738
AT2G35130	24.2787	19.2605	26.5296	21.1649
AT2G35160	2.28093	2.20414	2.88645	2.21897
AT2G36026	46.8806	30.2189	38.5179	31.9783
AT2G36250	77.342	86.374	64.5911	77.7277
AT2G36290	2.89961	17.0106	7.04213	16.5917
AT2G36310	54.3698	59.6625	39.7542	55.5078
AT2G36400	48.5919	43.3992	45.2761	38.6851
AT2G36460	181.99	187.561	155.631	171.155
AT2G36690	3.04958	4.30752	3.69756	3.57729
AT2G36890	3.95297	4.08154	5.55894	3.09614
AT2G37260	12.8433	9.09564	13.2681	11.3523
AT2G37340	105.856	96.7362	121.027	96.5205
AT2G37410	140.579	120.939	156.512	132.339
AT2G37678	27.0399	14.0861	35.9186	20.8682
AT2G37760	49.6941	50.9995	38.7652	44.5266
AT2G37960	4.08118	2.4109	2.43255	2.03283
AT2G38080	1.61338	8.73749	4.14963	8.16441
AT2G38290	9.50967	31.3688	18.5051	28.4351
AT2G38470	77.251	87.2137	97.8624	92.1989
AT2G38770	15.6246	16.2895	14.5481	15.0378
AT2G38790	25.1768	27.1514	23.2811	24.8975
AT2G38810	50.0647	23.4531	54.6612	28.2888
AT2G39250	55.3319	36.4328	62.558	38.7405
AT2G39420	24.1539	22.7611	17.2394	22.3431
AT2G39675	15.6174	5.48163	37.4228	11.1398
AT2G39681	10.3806	4.26278	31.8106	7.49302
AT2G39700	20.6533	53.7558	51.4169	52.6288
AT2G39705	35.8673	18.1029	38.6745	24.3295
AT2G39725	25.5708	10.2324	21.988	9.75556
AT2G40120	5.30042	3.02898	4.54757	3.92523
AT2G40150	4.50433	6.7937	8.61049	6.4656
AT2G40630	11.1957	9.95549	13.7384	8.39885
AT2G40840	61.51	69.0518	61.2207	57.6856
AT2G41050	3.28443	4.76495	6.28431	5.26964
AT2G41500	15.8874	13.96	19.8654	15.3543
AT2G41720	35.6043	38.1039	32.9394	31.8537
AT2G42200	21.9699	9.88336	26.2016	14.0133
AT2G42380	49.0973	36.3308	57.2963	38.8352
AT2G42510	4.10937	3.75772	4.12846	3.18141
AT2G42790	24.0807	24.3043	21.3274	24.1205
AT2G43710	183.442	207.551	166.918	190.982
AT2G43945	123.026	96.3928	111.953	108.448
AT2G44190	5.19642	4.49244	4.50026	4.72481
AT2G44620	154.045	82.9581	167.583	119.912
AT2G44950	19.5426	15.0504	19.0902	13.4191
AT2G45000	29.23	29.5118	17.9243	24.0429
AT2G45120	8.59633	5.72884	6.66079	5.84612
AT2G45160	27.4131	21.1676	33.724	24.7658
AT2G45850	52.6623	37.385	59.2045	41.8677
AT2G46060	2.45985	10.5486	3.69091	10.5759
AT2G46590	16.8702	9.81298	18.3075	10.25
AT2G46800	25.7623	44.9705	53.3278	47.9481
AT2G47260	5.04155	3.61399	6.00116	3.71651
AT2G47620	26.5996	24.0303	24.3433	21.9982
AT2G47640	133.031	80.1888	110.395	89.9038
AT2G47850	33.8829	27.2242	38.388	27.3515
AT2G47900	63.2972	43.8368	66.7688	54.6611
AT2G48010	5.73461	10.3997	6.485	9.64267
AT2G48110	13.4688	14.6915	11.8767	11.2759
AT3G01460	7.74563	9.38283	7.21901	7.04652
AT3G01490	62.0254	49.8972	55.5502	54.3811
AT3G02010	2.33217	1.53538	2.61787	1.79194
AT3G02050	10.4843	26.7389	17.1804	26.8224
AT3G02290	21.3755	16.152	28.0147	17.7424
AT3G02340	28.7836	23.318	31.162	26.3032
AT3G02450	60.8257	57.0163	57.7053	57.4153
AT3G02760	40.1568	45.36	33.3087	37.9271
AT3G03350	4.25194	2.7214	4.725	1.64496
AT3G03580	3.82185	3.16836	4.60769	3.01011
AT3G03720	7.11385	23.9646	13.0166	21.0902
AT3G04380	6.67563	5.51572	5.96605	4.59225
AT3G04820	11.0862	11.9609	8.10126	10.37
AT3G05010	5.81938	24.6597	11.7833	23.6149
AT3G05140	3.35745	3.12624	3.33293	1.89353
AT3G05350	54.0362	64.4579	44.8629	57.736
AT3G05380	7.63551	8.4966	8.82929	7.54475
AT3G05510	10.7865	12.064	13.2941	11.7293
AT3G05530	106.51	108.298	100.207	97.8337
AT3G05690	17.035	13.4317	18.084	17.2706
AT3G06040	113.521	64.081	140.683	83.9801
AT3G06270	18.7434	13.0228	24.0785	14.43
AT3G06470	12.7672	43.7136	21.7667	39.7864
AT3G06483	78.9472	57.558	82.0081	69.8779
AT3G06868	38.5537	30.7667	35.6737	34.0963
AT3G07280	11.6232	6.40538	17.5647	7.06448
AT3G07730	6.52455	6.54564	6.67134	5.95589
AT3G09010	6.71673	5.98428	7.54254	4.76409
AT3G09035	4.81554	20.7766	8.46822	23.0854
AT3G09050	105.07	79.2649	102.309	95.2913
AT3G09350	17.932	19.5221	16.8719	19.2002
AT3G09660	2.52066	2.6175	2.98031	1.94865
AT3G10010	7.76949	8.2695	5.99575	5.95679
AT3G10070	18.3595	19.4888	11.2174	17.6938
AT3G10160	51.0041	40.1603	50.6987	39.9432
AT3G10180	2.26533	2.19966	1.32517	1.49911
AT3G10250	38.1083	34.0594	32.6955	33.0727
AT3G10490	40.2484	45.2535	33.0909	41.3335
AT3G10800	15.2019	23.8048	16.8186	23.9926
AT3G11120	468.924	163.873	544.065	292.582
AT3G11130	48.339	63.5435	40.8549	51.3581
AT3G11440	3.11592	0.929097	5.48193	1.62222
AT3G11964	10.5054	10.9294	7.04879	7.84282
AT3G12380	15.478	15.3635	15.0056	15.2498
AT3G12460	6.198	4.19992	3.79012	5.29835
AT3G12640	23.4916	22.7708	21.8973	20.7152
AT3G12670	50.1208	62.1974	39.542	48.1257
AT3G12730	27.995	18.8575	23.5656	15.7896
AT3G13290	9.97807	11.3529	6.91844	10.9896
AT3G13690	42.8637	33.504	38.0432	31.6295
AT3G13910	30.8017	11.5131	36.7967	19.1404
AT3G14110	181.96	150.395	182.487	165.949
AT3G14190	43.5658	31.1326	27.3062	34.3927
AT3G14200	47.6912	31.8724	49.8362	40.5881
AT3G14770	20.0092	38.833	33.6653	38.2203
AT3G14860	16.3739	32.8562	24.9979	33.9499
AT3G15030	60.2189	40.02	65.4584	45.2657
AT3G15270	11.0773	5.8635	10.8216	6.04765
AT3G15355	15.2893	13.6808	16.6054	14.0746
AT3G15390	10.8879	8.70088	8.81151	7.20038
AT3G15530	20.5385	38.3841	42.3371	39.1673
AT3G16710	5.36973	4.16839	5.83201	2.72293
AT3G16890	2.942	1.98329	2.99976	1.87853
AT3G17185	88.1109	35.1335	144.897	50.2165
AT3G17611	9.50422	11.2431	10.2368	9.5584
AT3G17750	16.8	18.7983	15.1336	16.1563
AT3G18290	44.6787	52.5954	41.2337	45.3766
AT3G18520	30.461	26.8839	30.074	22.9156
AT3G18790	51.9297	43.6538	44.6399	42.9516
AT3G19400	5.96955	28.6005	13.3444	27.5252
AT3G19420	58.1625	63.8656	59.0467	58.2532
AT3G19540	32.1711	30.7945	36.2324	31.8645
AT3G19720	40.9489	40.6179	32.9541	34.1252
AT3G19780	4.45586	6.17623	8.29065	6.17229
AT3G20330	38.071	44.396	33.5515	38.018
AT3G20640	7.64877	5.51161	6.88958	5.56767
AT3G20898	17.0631	8.77228	19.4579	12.6693
AT3G20910	24.8657	17.5678	23.985	17.5544
AT3G21070	28.7392	28.2887	31.269	26.0468
AT3G21175	30.023	30.5974	30.2416	29.6648
AT3G21650	14.864	12.0842	19.4641	13.0303
AT3G22415	12.764	1.89627	17.2861	4.1422
AT3G22470	3.47843	3.84313	2.99355	2.9897
AT3G22660	71.8974	67.4944	50.8054	60.2338
AT3G22790	12.5937	13.1603	11.0598	11.5292
AT3G22890	205.811	204.853	203.158	210.116
AT3G22950	60.1491	47.4711	50.1444	52.9411
AT3G23000	64.8065	49.2189	109.269	59.848
AT3G23050	189.928	170.896	168.249	174.539
AT3G23160	11.2772	7.49672	13.0356	9.05324
AT3G23430	7.53416	8.75072	11.7126	7.41179
AT3G23690	57.6394	50.9815	48.8478	46.7953
AT3G23810	154.85	168.028	141.289	160.049
AT3G23900	23.2816	27.448	19.8637	23.6299
AT3G24050	123.077	98.656	121.606	105.065
AT3G24180	27.5578	27.2722	24.0276	25.575
AT3G25570	4.77128	2.33403	0.835425	0.972037
AT3G25572	17.6721	9.63009	23.8141	13.6171
AT3G25740	26.5752	19.3882	20.7971	22.5671
AT3G26200	5.31227	20.0632	10.5929	18.1598
AT3G26240	10.6694	12.0293	11.7175	9.5329
AT3G26400	38.2867	38.3633	33.8446	33.9156
AT3G26590	7.61507	20.9053	13.9307	19.4067
AT3G26690	19.1027	8.2559	25.2316	10.44
AT3G26810	41.4044	26.8161	54.3831	31.672
AT3G26840	6.71087	8.27451	5.03286	5.86391
AT3G27270	1.5226	6.34271	3.10127	8.84714
AT3G27550	8.14002	9.50299	7.76226	8.2935
AT3G28007	1.67064	5.26626	4.01117	4.99581
AT3G28180	30.9263	64.3281	47.9871	62.1095
AT3G28480	7.14192	31.2981	12.7994	29.6157
AT3G28690	41.7482	32.4986	46.8533	35.3719
AT3G28850	3.14661	3.39121	4.45194	3.39197
AT3G28956	17.9373	6.2638	21.6153	12.8523
AT3G29075	95.5765	86.818	77.9099	91.3529
AT3G29230	25.7347	26.0145	25.0262	22.4097
AT3G42860	7.11851	7.14206	5.67613	7.3525
AT3G43610	17.327	14.7193	15.6548	11.703
AT3G44050	5.26551	6.40385	4.79389	4.93936
AT3G44200	12.3821	15.9275	11.3377	13.9232
AT3G44590	91.5377	38.9639	88.2085	64.6398
AT3G44860	8.15044	10.0963	5.15887	8.17833
AT3G44940	11.0318	7.71847	14.2003	9.25427
AT3G45100	20.6411	11.8826	23.2487	13.0574
AT3G45190	41.6395	44.5431	37.5196	39.0352
AT3G45300	22.626	26.2231	20.8561	21.9804
AT3G45850	32.0461	31.6819	25.5531	26.5311
AT3G45860	4.30548	6.2572	7.49543	5.48693
AT3G46130	28.467	13.9707	52.6234	23.121
AT3G46200	12.3157	6.65329	13.5172	6.49234
AT3G46540	81.6275	72.0654	87.5148	69.8303
AT3G47120	42.1338	37.1826	33.3117	30.5396
AT3G47360	6.58692	6.8065	12.7404	6.25849
AT3G47640	52.7162	38.0739	60.5235	44.5486
AT3G47890	11.2607	9.75006	11.0027	8.04717
AT3G47910	18.8864	20.4199	14.6826	14.8122
AT3G47990	10.375	22.0759	24.8718	22.6938
AT3G48050	18.5023	17.8591	16.3694	16.7191
AT3G48460	6.96396	34.6838	12.2891	33.4704
AT3G49010	321.414	280.032	330.595	301.757
AT3G49140	83.5561	68.7964	78.8698	68.9309
AT3G49430	86.3703	80.708	74.2595	78.0852
AT3G49601	59.0915	62.7348	52.2676	60.5148
AT3G51270	67.6346	64.9952	58.5609	58.0949
AT3G51310	32.3058	36.8529	28.7136	29.8058
AT3G52280	58.4389	51.9057	40.6178	42.2105
AT3G52420	140.659	58.7752	154.406	88.3326
AT3G52770	22.2399	8.14185	27.742	12.1124
AT3G52910	30.8235	28.3233	27.8553	24.0074
AT3G52940	3.61611	31.582	10.2707	29.7655
AT3G53270	22.6162	13.6855	25.5445	13.1474
AT3G54140	7.81598	29.0881	16.3167	27.8761
AT3G54280	9.81668	8.29414	8.02433	6.67401
AT3G54710	11.7389	12.0882	10.3323	10.8709
AT3G54910	8.23435	3.04475	12.6609	3.06319
AT3G54980	5.79058	7.10533	5.76508	6.07695
AT3G54990	19.616	17.2781	17.926	15.0167
AT3G55410	35.739	52.7408	35.0229	43.672
AT3G55470	49.4888	32.7682	41.7112	32.597
AT3G55620	126.53	113.835	97.3801	117.896
AT3G55660	12.0583	13.9208	11.1553	13.0286
AT3G56110	20.802	50.6754	28.4582	54.0487
AT3G56190	107.757	101.327	109.071	101.321
AT3G56220	4.30083	1.5037	4.4585	1.96835
AT3G56408	9.79264	2.24735	9.58314	5.26331
AT3G56450	6.53386	2.82829	10.4806	3.40449
AT3G57230	60.5589	35.0425	54.874	37.0074
AT3G57330	18.3338	34.0169	23.1516	32.4775
AT3G57540	5.73454	3.88423	5.05583	3.84692
AT3G57600	16.5672	14.7258	17.6983	15.8003
AT3G57720	4.86169	4.46455	6.01675	4.52395
AT3G57730	5.17901	4.37678	6.65267	4.17828
AT3G57920	8.3006	3.95882	10.6879	4.94929
AT3G57965	11.9459	11.1234	15.3183	10.7943
AT3G58270	4.58596	4.61734	4.04229	3.64278
AT3G58560	63.9671	49.9372	51.3209	50.832
AT3G59000	5.30725	6.12918	9.78964	5.15743
AT3G59020	29.7496	37.6054	28.8691	31.6913
AT3G59080	10.4243	27.2771	19.1536	26.9134
AT3G59210	12.8926	8.21893	17.3517	9.71644
AT3G59360	13.8362	34.3244	21.2095	30.0988
AT3G59670	19.4999	10.4586	23.886	13.1972
AT3G59880	9.70501	7.13908	8.86872	6.50095
AT3G60250	57.5064	40.2157	62.0872	44.8015
AT3G60580	7.53309	3.6802	7.64687	4.38994
AT3G60630	25.9185	19.2578	31.2413	24.0177
AT3G60830	18.7308	22.185	15.6709	19.7696
AT3G60980	20.9012	21.0898	24.2813	18.5924
AT3G61280	2.41717	3.98815	3.25563	3.97722
AT3G61310	58.0886	39.0555	53.311	46.444
AT3G61740	6.70671	5.8281	5.08594	4.55758
AT3G62070	22.2762	15.4067	22.2781	16.1445
AT3G62980	80.4015	65.5914	96.459	72.5414
AT3G63180	16.6955	16.9595	13.584	14.7932
AT3G63280	5.34017	3.79785	5.39317	4.62025
AT3G63400	45.9232	41.5983	52.8369	41.6716
AT3G66658	2.77968	18.764	6.21357	15.9846
AT4G00150	16.0141	13.4414	15.407	14.672
AT4G00440	21.4131	21.3525	21.5367	18.0002
AT4G00450	13.5193	15.1011	10.8022	12.0802
AT4G00755	45.3756	41.5148	42.1968	40.0099
AT4G00760	7.61519	3.20007	9.3524	2.94023
AT4G00930	5.26535	6.1441	5.73038	5.43813
AT4G01460	31.9549	21.4207	52.6705	25.0004
AT4G02510	102.651	107.679	96.2397	96.9401
AT4G02530	457.747	374.079	378.598	390.65
AT4G02900	3.92589	2.27326	3.63314	2.13887
AT4G02940	46.9521	57.2805	41.4043	54.2533
AT4G03060	22.3611	13.8259	26.2872	14.6686
AT4G03190	28.7495	30.7277	32.8875	30.0906
AT4G04340	21.2141	73.1901	41.4145	72.3931
AT4G04570	18.4826	49.3925	39.3149	46.2761
AT4G04630	24.9616	15.139	29.508	16.6468
AT4G04885	20.3297	14.1564	20.8293	16.0416
AT4G04920	10.6568	10.4663	9.9176	10.1342
AT4G05390	57.3515	56.1593	48.2946	54.9432
AT4G05410	19.5015	21.7988	14.0738	17.6179
AT4G07410	30.5832	25.9123	37.1508	22.6144
AT4G08160	4.40924	5.82498	3.21188	4.36389
AT4G08230	40.7566	50.9099	45.6811	47.313
AT4G08460	93.1796	60.1045	112.715	71.7089
AT4G08590	3.74539	3.15636	3.97637	2.83777
AT4G08685	55.1056	97.8464	79.7579	116.594
AT4G08870	79.9212	74.5377	70.7695	75.4678
AT4G08900	27.0612	27.1328	25.5715	26.2923
AT4G09010	326.374	284.712	285.792	282.338
AT4G09340	32.3645	23.8259	27.7215	23.8121
AT4G10050	17.9668	16.3735	11.5777	16.1993
AT4G10390	2.87463	2.07389	3.84955	2.13307
AT4G10570	8.55683	8.15968	8.33807	7.61442
AT4G10750	69.566	66.1934	48.7737	66.1317
AT4G10970	95.5161	64.8315	72.4544	71.4067
AT4G11070	5.44082	5.37225	6.92435	4.91741
AT4G13070	8.50886	6.08412	9.583	5.86148
AT4G13330	3.23463	4.14124	3.99375	2.46296
AT4G13495	142.273	82.1242	229.849	95.2488
AT4G14340	22.3669	24.1715	24.504	22.2938
AT4G14680	38.0087	44.2294	34.7336	42.0896
AT4G14850	5.23074	3.24101	4.93038	4.2463
AT4G14900	67.9374	69.7516	58.099	64.9371
AT4G14930	33.4829	24.0158	33.3228	27.1369
AT4G15240	3.05617	10.857	8.20113	9.63834
AT4G15410	33.8107	39.9644	29.835	36.343
AT4G15430	1.9232	7.41458	3.1736	6.74957
AT4G15540	20.3756	22.3099	32.5172	20.6803
AT4G15780	99.9155	73.8447	138.126	79.325
AT4G15850	8.01914	7.36662	8.7333	7.06789
AT4G16580	33.6893	26.3413	31.0069	28.776
AT4G16660	17.0577	45.8749	25.7982	40.8728
AT4G16970	5.59822	5.85891	3.75581	4.68988
AT4G16990	105.779	104.134	97.1723	88.9387
AT4G17260	26.475	28.1073	20.1107	27.9328
AT4G17330	33.0397	38.6527	22.7513	30.5156
AT4G17550	3.92766	14.2465	7.09529	13.5091
AT4G17840	91.8286	65.0539	85.3606	68.6647
AT4G17950	34.6889	34.7955	34.1696	33.1454
AT4G17970	7.22279	16.7001	14.4597	16.5222
AT4G18060	60.7906	53.252	48.3074	54.9916
AT4G18250	1.23501	4.47648	3.78921	4.97526
AT4G18460	29.5908	21.3234	29.128	21.3054
AT4G19020	13.4253	11.2638	10.2651	9.18034
AT4G19090	3.02766	1.37096	2.80912	1.26918
AT4G19440	4.62264	3.2536	7.3703	3.19039
AT4G19550	16.1759	10.5944	28.0415	13.7883
AT4G19600	28.7103	23.058	33.7374	24.3457
AT4G19700	29.3167	24.3216	33.6185	27.3682
AT4G19900	4.47326	10.5514	6.50725	9.38819
AT4G20140	2.66196	1.77652	3.22898	1.86998
AT4G20400	26.992	32.1487	23.2985	25.5938
AT4G20430	4.46509	12.538	9.07169	11.0097
AT4G20440	93.0968	84.2349	76.8208	82.6908
AT4G20820	2.22377	8.57925	5.30755	8.12594
AT4G21326	2.7322	1.34185	4.91783	1.3153
AT4G21400	3.51501	1.79932	4.6904	1.35621
AT4G21700	1.81204	3.11364	2.81699	2.73762
AT4G21710	23.2959	25.3326	19.9529	23.012
AT4G21990	101.733	106.331	101.61	103.976
AT4G22200	5.61363	16.5745	9.42158	14.2782
AT4G22220	207.623	160.911	175.616	188.274
AT4G22745	65.8687	42.5364	63.4534	49.6087
AT4G23010	13.2507	35.8971	21.2097	33.4818
AT4G23840	8.45324	8.16901	10.6181	8.04732
AT4G23990	2.26214	8.36881	4.09853	8.26286
AT4G24480	8.05269	6.33641	7.85184	5.46182
AT4G24590	35.2295	22.103	34.1727	22.7147
AT4G24710	4.56621	2.97164	4.25587	3.01337
AT4G24830	78.4125	96.9387	61.3327	86.033
AT4G25210	77.9687	76.918	66.5212	72.3482
AT4G26110	73.9615	73.124	86.0871	72.0048
AT4G26120	2.4917	2.82485	2.61453	2.32886
AT4G26660	11.7461	15.1532	11.1585	12.9382
AT4G26940	9.50173	23.2749	15.3342	27.7951
AT4G27340	20.3322	17.2464	17.332	14.0396
AT4G28010	3.78531	4.48725	4.22794	3.45314
AT4G28760	34.9825	31.6359	36.1655	30.2467
AT4G29430	54.7663	26.9136	47.9495	36.2432
AT4G29490	36.0192	38.5048	25.7953	30.4601
AT4G29900	11.9234	23.332	16.4469	17.8596
AT4G30000	7.71685	8.96978	6.85571	7.62137
AT4G30060	2.67	7.06374	5.95285	6.98845
AT4G30080	21.8693	19.8116	23.2248	19.3513
AT4G30190	35.1136	81.5026	55.3364	75.5273
AT4G30440	66.8344	165.556	110.59	169.443
AT4G30750	63.9014	40.3409	70.2908	49.6895
AT4G30760	99.6293	59.8471	134.069	83.8685
AT4G30840	21.7465	16.9352	17.6233	15.7528
AT4G31770	13.5264	14.1742	11.906	11.76
AT4G31780	85.2422	77.7424	86.7927	77.7877
AT4G31800	50.2241	45.2948	57.2732	48.1058
AT4G32390	10.278	55.401	24.8655	57.004
AT4G32660	29.0518	18.5195	31.4498	17.6828
AT4G32820	7.04674	8.7477	5.27807	6.52593
AT4G33010	276.29	338.796	213.628	309.226
AT4G33060	30.2523	27.0247	30.5964	24.0003
AT4G33430	10.7605	41.3891	19.7048	39.71
AT4G33680	125.749	150.871	96.1412	144.017
AT4G34090	83.9577	78.4299	66.6329	75.9879
AT4G34370	19.2179	20.3002	25.438	18.0686
AT4G34490	75.7763	74.6753	66.3545	71.6895
AT4G34588	63.3039	34.758	65.2732	48.4432
AT4G34920	75.029	63.3629	75.6036	72.7381
AT4G35080	48.7496	39.138	55.3512	43.5299
AT4G35130	2.43978	1.81288	2.37456	1.79459
AT4G35230	38.503	64.9528	52.9063	64.2845
AT4G35290	2.33165	4.4407	5.18997	4.90766
AT4G35790	49.2195	42.7073	46.7695	44.3559
AT4G35800	16.2147	24.025	12.621	18.7979
AT4G35880	7.15989	25.44	10.841	21.51
AT4G36770	2.56635	3.05603	2.35642	1.76046
AT4G36780	61.652	51.8912	74.993	56.2695
AT4G36920	33.5012	31.9533	32.514	29.5502
AT4G37080	44.3804	39.5031	40.6402	38.834
AT4G37150	6.50375	5.47021	6.5385	4.16561
AT4G37410	2.27931	27.4547	8.92055	26.2928
AT4G37540	157.571	122.676	191.249	140.5
AT4G37680	5.71966	10.3557	11.0744	11.2766
AT4G38320	6.65804	6.31912	11.1172	7.93811
AT4G38480	10.4383	5.72331	12.2319	7.26666
AT4G38960	16.5276	9.74499	16.3882	10.4572
AT4G39690	26.0298	33.1707	24.8396	29.5126
AT4G39840	4.66894	38.1782	10.394	36.5117
AT5G01090	8.11683	39.4344	16.8065	40.0799
AT5G01160	38.9984	30.2946	43.0126	32.7922
AT5G01370	16.8633	18.7626	15.4484	16.1365
AT5G01510	7.46918	6.80813	9.93629	5.38684
AT5G01810	89.3169	54.0371	95.1931	61.9382
AT5G01950	8.24721	8.94965	13.5558	9.01087
AT5G02010	15.3994	13.1555	15.3037	11.3879
AT5G02470	24.8206	15.9028	21.5585	17.9286
AT5G02860	17.5512	21.4565	13.0943	16.4928
AT5G03340	21.865	28.7185	18.5573	23.4026
AT5G03390	11.8952	9.07488	11.7733	9.58803
AT5G03440	47.1137	22.9225	38.885	26.8218
AT5G04200	16.8983	14.0397	11.6879	15.2502
AT5G04240	12.8588	13.1909	12.8665	11.3904
AT5G04360	28.3999	36.1563	19.8795	26.5079
AT5G04600	144.766	109.411	143.322	121.247
AT5G04860	5.41796	4.51268	4.83841	4.57679
AT5G05100	69.3735	51.2576	77.9965	52.6811
AT5G05520	33.6871	33.3914	34.2678	32.9301
AT5G05800	27.3371	21.7415	36.5364	23.7426
AT5G05840	2.77865	2.1409	3.1067	2.51208
AT5G06100	11.0905	5.46235	26.5731	7.80934
AT5G06120	12.0043	11.4575	13.1018	9.25025
AT5G06310	3.67657	2.43746	3.16817	1.35769
AT5G06340	104.206	67.0617	138.921	89.4853
AT5G06350	8.95237	8.74788	8.0882	8.14811
AT5G06420	6.54964	5.4441	5.68426	6.08384
AT5G06580	22.05	27.7497	18.195	24.8781
AT5G07140	5.99566	5.05293	5.63169	5.24358
AT5G07460	65.7329	46.0467	58.0233	54.0831
AT5G07700	4.62924	3.41158	6.38051	3.65825
AT5G07970	15.8761	15.5231	15.0479	13.3105
AT5G08120	41.6217	35.3958	36.2205	33.9579
AT5G08550	13.7111	13.483	12.2405	12.4011
AT5G08560	48.2615	41.6063	45.665	42.3856
AT5G08620	21.1011	16.2266	25.451	18.52
AT5G08770	23.8509	12.0804	26.0904	16.8933
AT5G09460	70.2848	48.5303	76.3504	56.3424
AT5G09670	38.9611	25.588	43.0462	29.4592
AT5G10180	35.8005	48.1845	54.5572	45.7177
AT5G10200	10.225	11.474	9.98664	9.66995
AT5G10320	8.97602	5.75171	10.6141	6.68907
AT5G10460	84.6377	66.5801	67.4753	66.9955
AT5G10750	53.565	46.3601	47.5016	44.403
AT5G10820	4.39206	8.23494	6.1254	6.90726
AT5G11160	28.4064	19.6244	25.6122	18.7982
AT5G12430	18.0835	18.3754	14.6035	15.6933
AT5G12840	46.9413	33.6584	44.0384	38.0797
AT5G12850	32.4333	37.0102	31.7134	32.5936
AT5G13180	129.654	109.684	120.813	107.439
AT5G13630	183.784	208.891	179.701	197.348
AT5G13820	3.74761	3.62726	4.93494	3.02958
AT5G13890	4.42822	25.5415	7.9068	23.5876
AT5G14720	54.3049	43.9309	50.4345	41.9841
AT5G14750	3.0753	2.44371	4.97604	2.4262
AT5G14770	5.16011	3.3074	5.41539	3.05764
AT5G16880	65.1333	59.3892	83.4891	64.6534
AT5G17580	4.71465	2.2746	7.83808	3.28489
AT5G17770	50.3511	92.1348	78.6916	100.168
AT5G18230	56.7776	64.6526	41.0568	55.3116
AT5G18255	11.1748	5.22595	36.2324	11.7281
AT5G18830	19.4679	16.0013	19.8045	16.1073
AT5G19590	82.5275	184.658	108.6	216.108
AT5G20110	32.1648	21.4528	34.1727	26.9905
AT5G20200	24.604	27.9451	24.3906	26.0824
AT5G20580	6.81064	17.3211	10.8289	16.3124
AT5G20960	6.452	8.87355	5.71808	7.52864
AT5G21170	112.586	109.581	109.315	121.243
AT5G22080	98.7289	74.9021	90.2365	72.8459
AT5G22640	120.204	118.618	110.484	110.135
AT5G23090	45.6985	27.9267	37.0168	32.0539
AT5G23110	3.41502	4.35905	2.76468	3.15186
AT5G23250	51.5287	42.4151	44.0105	45.4173
AT5G23480	2.93286	2.44434	4.16924	2.19663
AT5G23530	27.6842	26.1683	19.9245	22.3387
AT5G23630	8.98359	25.74	14.4549	22.0445
AT5G23870	10.3352	25.1011	17.885	20.3031
AT5G24350	6.71505	8.67633	5.31907	6.17038
AT5G24630	11.2743	7.69848	8.23748	7.27573
AT5G24735	104.602	46.7065	167.41	73.0059
AT5G24770	13.2626	78.7173	24.5403	82.354
AT5G24890	82.9806	53.5396	117.041	73.1384
AT5G25220	77.6859	74.508	70.2221	71.4136
AT5G25752	80.4379	76.8354	63.4902	73.0246
AT5G25780	27.1126	30.4155	26.2835	27.3143
AT5G26830	52.8027	66.3843	43.2922	55.7062
AT5G27395	31.0913	28.6825	28.0647	27.4661
AT5G27440	8.46536	4.04258	7.7993	4.05185
AT5G27660	3.24449	2.41636	6.93039	2.77862
AT5G27750	6.29599	4.29346	6.35871	4.4112
AT5G28350	7.46192	8.26366	5.93638	6.23742
AT5G33300	7.04097	6.67854	7.04186	6.07551
AT5G35630	616.431	753.082	470.177	673.402
AT5G35670	11.9328	8.46662	9.41401	9.62344
AT5G36930	7.19851	7.4337	8.41628	7.02543
AT5G37020	29.2478	24.8892	28.1912	20.495
AT5G39610	8.91763	9.0621	8.72878	10.3997
AT5G39710	7.65339	7.9781	9.89526	7.59367
AT5G39740	279.151	241.083	259.912	262.247
AT5G40340	32.2781	34.8477	29.9047	31.2727
AT5G40530	24.5233	15.4385	23.8184	17.1758
AT5G40630	2.79806	1.69548	2.95596	1.04354
AT5G41770	48.0516	53.8023	37.577	45.2788
AT5G42240	8.70855	44.682	23.3384	40.7373
AT5G42870	22.6285	19.6817	16.2057	17.3302
AT5G43060	7.67864	54.5043	18.9297	53.4535
AT5G43130	42.4302	37.3863	34.125	33.9508
AT5G43270	22.6533	12.5185	36.13	15.0569
AT5G43280	53.3275	46.9315	39.678	46.2082
AT5G43460	59.3307	74.3082	156.32	86.2721
AT5G43730	2.48344	1.3106	2.81267	1.30944
AT5G43740	7.81821	8.64767	12.5434	7.74812
AT5G43780	53.7571	55.2431	43.7626	54.6385
AT5G44170	29.7345	25.5102	33.464	27.6411
AT5G44660	27.0349	9.84035	50.0602	13.699
AT5G44780	4.41753	5.53433	4.05489	4.84017
AT5G44800	13.978	15.4392	11.5306	12.3222
AT5G45060	15.9423	13.7884	18.1341	13.242
AT5G45330	9.00529	9.6518	7.75729	8.42253
AT5G45460	3.59092	2.51161	5.14027	1.81353
AT5G45470	4.03253	20.204	8.20101	17.907
AT5G45480	8.89755	15.0776	9.18795	13.2177
AT5G45840	1.40536	2.95899	3.36546	3.79881
AT5G46030	157.116	84.4142	141.713	105.421
AT5G46080	3.45406	4.0067	5.35986	3.7823
AT5G46170	22.5916	19.155	26.3009	20.5567
AT5G46280	15.939	19.4493	11.4593	15.4406
AT5G46470	12.9205	9.46067	14.4711	8.64772
AT5G47840	176.657	133.389	193.351	145.91
AT5G48380	15.3973	38.3648	26.1732	38.1759
AT5G48545	85.5008	45.4081	75.4434	56.2217
AT5G48560	2.30643	2.26596	2.82284	1.90934
AT5G48600	10.4858	13.5087	6.78525	8.46616
AT5G48657	8.57227	7.97395	5.74378	8.70545
AT5G48830	41.6696	27.3019	46.2115	33.0892
AT5G49215	4.98727	14.766	10.9238	14.1996
AT5G49330	23.9482	18.4525	21.8362	16.7859
AT5G49470	10.6452	9.46114	10.5126	8.47816
AT5G49710	37.7669	14.8874	41.7119	21.9043
AT5G51220	25.1827	20.1753	20.6264	23.101
AT5G51450	3.83983	9.84696	6.52449	9.30988
AT5G51850	3.70053	4.20388	3.6627	3.52884
AT5G52010	49.4666	35.9415	42.7221	36.0006
AT5G52060	74.5635	62.0256	78.4704	62.0813
AT5G52280	21.997	22.7452	20.3293	21.9836
AT5G52450	8.45451	22.058	12.4255	18.3581
AT5G52550	35.1382	26.0833	37.119	28.4552
AT5G52600	4.22729	2.75814	2.66814	2.41297
AT5G52810	44.2253	41.7916	37.6675	35.2423
AT5G53060	13.7577	15.6824	10.7293	11.8091
AT5G53130	18.8682	29.8394	31.7557	27.7569
AT5G53220	10.5397	7.23668	10.2933	7.33832
AT5G54180	19.8076	24.9489	19.9105	23.001
AT5G54760	257.713	149.253	242.896	188.986
AT5G55280	149.202	128.707	114.738	128.715
AT5G55660	55.4378	68.0512	39.6928	57.7157
AT5G55930	6.4093	9.67125	13.155	10.5652
AT5G56650	8.12972	25.1484	20.9699	26.2639
AT5G56660	3.78105	15.838	9.85711	16.064
AT5G56860	60.8805	61.8998	60.0942	58.1927
AT5G57035	14.5374	17.0038	14.6162	14.716
AT5G57050	9.32399	9.88158	12.849	7.94052
AT5G57350	22.3721	49.7671	32.7932	42.8565
AT5G57580	56.5506	54.9428	52.222	52.7633
AT5G57590	8.28526	8.15821	6.51144	6.60574
AT5G57700	27.2469	23.3604	23.643	22.501
AT5G58210	19.2295	10.1435	16.7278	13.4675
AT5G58320	10.656	9.09241	10.502	6.91552
AT5G58390	11.3731	54.5034	19.1771	51.1467
AT5G58980	2.50669	2.28828	5.51677	1.82689
AT5G60020	1.33068	8.28632	2.45837	7.00203
AT5G60040	4.07516	5.44624	3.38127	3.75393
AT5G60120	30.8819	20.7671	27.0569	20.1233
AT5G60370	14.4699	10.2387	14.986	9.94518
AT5G60490	4.16017	15.3296	5.79771	15.7076
AT5G60650	2.60743	5.25903	3.08522	4.60215
AT5G60710	44.9301	46.6026	44.4479	42.6229
AT5G60890	33.7366	19.1516	50.0809	25.945
AT5G60910	2.86185	1.8975	3.1869	2.10675
AT5G61360	8.682	4.10123	19.5144	7.10081
AT5G61430	3.45842	2.68399	4.86157	3.40722
AT5G61480	7.21887	19.5648	9.93609	18.0858
AT5G61510	58.7585	55.644	51.422	57.6889
AT5G61760	29.5445	26.5791	27.5591	27.585
AT5G62190	73.8944	63.2524	87.1335	65.0498
AT5G62500	20.8731	20.7838	15.5821	15.9825
AT5G62620	3.90702	11.1194	7.9382	9.2503
AT5G62670	14.6522	41.3368	21.798	34.7556
AT5G62700	162.467	163.586	137.22	158.428
AT5G63020	26.6215	26.1029	25.4692	23.5925
AT5G63090	8.88743	3.75724	15.6529	5.2479
AT5G63260	33.0902	26.2612	30.3183	26.7122
AT5G63490	21.0492	22.4687	16.9473	17.1548
AT5G64020	8.52461	11.953	15.6566	14.7174
AT5G64470	4.17654	15.3331	15.6192	15.9831
AT5G64552	24.9251	17.6579	22.3049	16.94
AT5G64640	3.66793	13.3138	6.16792	10.0105
AT5G64816	56.6367	28.4457	63.2628	45.9073
AT5G64990	4.27234	2.06798	2.09005	3.13486
AT5G65060	27.9072	13.6411	31.0913	15.4624
AT5G65560	5.58579	3.96154	5.96474	3.95163
AT5G65630	83.7144	52.9963	103.158	65.0628
AT5G65930	18.6622	17.9588	15.6498	14.627
AT5G66460	4.98915	5.39981	7.22639	6.55025
AT5G66760	67.162	78.8281	53.0413	72.564
AT5G67130	20.5831	41.8296	37.1164	44.5561
AT5G67180	14.6543	11.2616	17.6591	12.6174
AT5G67240	20.3826	15.6901	22.5845	13.8179
