# Supplementary material for: Biogenesis of phased siRNAs on membrane-bound polysomes in Arabidopsis
Source: eLife. 2016 Dec 12;5:e22750. doi: 10.7554/eLife.22750 (PMC5207768; doi:10.7554/eLife.22750)
Supplement: Supplementary file 4. — DOI: http://dx.doi.org/10.7554/eLife.22750.018 [file elife-22750-supp4.xlsx]

## Sheet: phasi_loci
Supplementary File 4. Changes in the abundance of phasiRNAs from known phasiRNA-generating loci caused by ago1-27 and ago1-36 mutations
Note: ratio of the abundance of phasiRNAs in ago relative to that in wild type is shown.
Gene ID	ago1-27 vs. wild type		ago1-36 vs. wild type		Gene annotation
	log2FC	p-Value	log2FC	p-Value
AT1G62590	-1.08682	2.28e-07	-4.93227	2.27e-34	PPR
AT1G62914	-1.88659	2.68e-21	-5.19924	2.75e-71	PPR
AT1G62910	-1.36298	4.52e-16	-4.92384	1.53e-36	PPR
AT1G63080	-0.49352	0.000145	-4.92148	2.14e-92	PPR
AT1G63330	-0.3167	0.607729	-3.12691	0.003788	PPR
AT1G63400	-0.47691	0.039517	-4.77705	2.72e-44	PPR
AT1G12775	-1.97279	3.35e-25	-5.03117	1.04e-21	PPR
AT5G16640	-3.22504	1.64e-31	-5.42437	1.64e-13	PPR
AT1G62670	-1.67865	1.51e-09	-7.84171	3.05e-15	PPR
AT1G62930	-1.77733	4.27e-14	-4.67641	1.1e-23	PPR
AT1G63130	-0.73083	5.94e-07	-3.47381	3.1e-100	PPR
AT1G63150	-0.84262	1.18e-10	-4.97847	1.7e-102	PPR
AT2G27400	-0.43275	0.000696	-1.24643	9.58e-16	TAS1A
AT1G50055	-0.22022	0.023208	-4.44807	4e-149	TAS1B
AT2G39675	0.827423	1.28e-19	-4.53752	1.5e-230	TAS1C
AT2G39681	-0.41057	0.000636	-3.4349	1e-142	TAS2
AT3G25795	-2.78005	1.98e-46	-5.02613	1.62e-47	TAS4
AT3G26810	-0.83476	5.47e-05	-3.12268	1.11e-12	AFB2
AT1G12820	-2.07698	5.2e-19	-3.73383	2.36e-20	AFB3
AT1G48410	-1.48136	8.23e-10	-3.11461	1.98e-06	AGO1
AT3G23690	-3.27403	3.02e-27	-3.07434	1.18e-06	bHLH
AT5G38850	-2.50957	4.97e-150	-6.33158	8.4e-201	TIR-NBS-LRR
AT5G43740	-2.19104	1.13e-36	-4.39596	1.48e-38	CC-NBS-LRR
